# Supplementary material for: Chemical synthesis of a library of natural product-like derivatives based on pinnaic acid and initial evaluation of their anti-cancer activity
Source: Royal Society of Chemistry journal article supplement (doi:10.1039/d2ob01626e), 2022-01-01

**Chemical synthesis of a library of natural product-like derivatives based on pinnaic acid and initial evaluation of their anti-cancer activity.**

Alex Fudger, Okan M. Cakir, Yousaf Khan, Alex Sinclair, Adam Le Gresley\*

***Supplementary Information***

**Undeca-1,10-dien-6-one (4)**

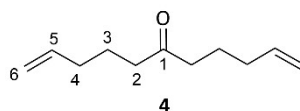

To a solution of undeca-1,10-dien-6-ol (20.9 g, 124 mmol) in anhydrous DCM (200 mL) was added pyridinium chlorochromate (36.2 g, 168 mmol) and silica gel (50 g). The resulting dark brown solution was left to stir at r.t for 24 hours followed by the addition of a further portion of silica gel (25.0 g) and left to stir at r.t for a further 30 minutes. The mixture was concentrated, diluted with Et<sub>2</sub>O (100 mL) and filtered through a pad of celite and silica gel which was washed with Et<sub>2</sub>O successively until the filtrate ran clear. The filtrate was concentrated to give **4** as a yellow oil 16.4 g, 79 %. **IR**  $\nu_{\max}$  (neat)/cm<sup>-1</sup> 2932, 1712, 1640, 1440, 1370; **NMR**  $\delta_{\text{H}}$  (400 MHz, CDCl<sub>3</sub>) 5.77-5.67 (2H, m, 5-H), 5.00-4.91 (4H, m, 6-H), 2.36 (4H, t, *J* 7.40, 2-H), 2.04-1.98 (4H, m, 4-H), 1.62 (4H, p, *J* 7.40, 3-H);  $\delta_{\text{C}}$  (75 MHz, CDCl<sub>3</sub>) 210.8 (1-C), 138.0 (5-C), 115.1 (6-C), 41.9 (2-C), 33.1 (4-C), 22.8 (3-C); **MS** *m/z* (EI) 166 (M<sup>+</sup> 1), 125 (10), 97 (64), 84 (48), 69 (100).

**Diethyl (2E,11E)-7-oxotrideca-2,11-dienedioate (5a)**

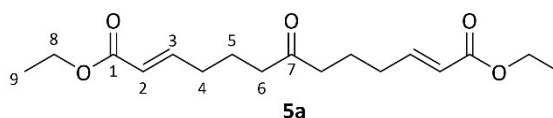

A solution of **4** (5.0 g, 30 mmol) in anhydrous DCM (150 mL) and ethyl acrylate (21 g, 20 mL, 181 mmol) were added to Hoveyda Grubbs II catalyst (0.47 g, 2.5 mol %) and the resulting mixture left to stir at r.t for 24 hours. A further portion of Hoveyda Grubbs II catalyst (0.47 g, 2.5 mol %) was added and the mixture continued to stir until TLC analysis confirmed complete consumption of the starting material (2 days). The reaction was stopped and the solvent evaporated to give **5a** as a viscous brown oil. The crude product was purified via flash chromatography eluting with hexane/EtOAc 4:1 to give diethyl (2E,11E)-7-oxotrideca-2,11-

dienedioate as a brown oil (4.3 g, 83 %). **IR**  $\nu_{\max}$  (neat)/ $\text{cm}^{-1}$  2937, 1712, 1652, 1265, 1179; **NMR**  $\delta_{\text{H}}$  (400 MHz,  $\text{CDCl}_3$ ) 6.83 (2H, dtd,  $J$  15.6, 6.96, 5-H), 5.73 (2H, dt,  $J$  15.6, 1.56, 6-H), 4.09 (4H, q,  $J$  7.14, 8- $\text{H}_2$ ), 2.36 (4H, t,  $J$  7.30, 2- $\text{H}_2$ ), 2.16-2.11 (4H, m, 4- $\text{H}_2$ ), 1.67 (4H, p,  $J$  7.33, 3- $\text{H}_2$ ), 1.21 (6H, t,  $J$  7.14, 9- $\text{H}_3$ );  $\delta_{\text{C}}$  (75 MHz,  $\text{CDCl}_3$ ); 209.3 (1-C), 166.3 (7-C), 147.9 (5-C), 121.9 (6-C), 60.1 (8-C), 41.6 (2-C), 31.3 (4-C), 21.8 (3-C), 14.2 (9-C); **MS**  $m/z$  (EI) 310 ( $\text{M}^+$ ), 123 (51), 95 (100), 81 (82).

**Dimethyl (2E,11E)-7-oxotrideca-2,11-dienedioate (5b)**

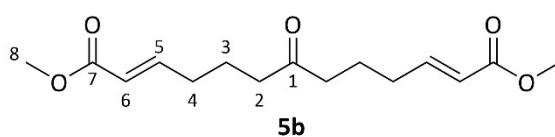

**5b** was obtained by following the synthesis for **5a** resulting in a yellow oil 2.7 g, 72%. **IR**  $\nu_{\max}$  (neat)/ $\text{cm}^{-1}$  2951, 1713, 1658, 1436, 1315, 1201; **NMR**  $\delta_{\text{H}}$  (400 MHz,  $\text{CDCl}_3$ ) 6.83 (2H, dt,  $J$  15.6, 6.97, 5-H), 5.74 (2H, dt,  $J$  15.6, 1.57, 6-H), 3.64 (6H, s, 8- $\text{H}_3$ ), 2.34 (4H, t,  $J$  7.30, 2- $\text{H}_2$ ), 2.13 (4H, qd,  $J$  14.5, 7.25, 4- $\text{H}_2$ ), 1.67 (4H, p,  $J$  14.6, 7.30, 3- $\text{H}_2$ );  $\delta_{\text{C}}$  (75 MHz,  $\text{CDCl}_3$ ) 209.3 (1-C), 166.8 (7-C), 148.3 (5-C), 121.5 (6-C), 51.4 (8-C), 41.6 (2-C), 31.3 (4-C), 21.8 (3-C); **MS**  $m/z$  (EI) 282 ( $\text{M}^+$  1), 155 (25).

**Ethyl (2E)-7-oxododeca-2,11-dienoate (5d)**

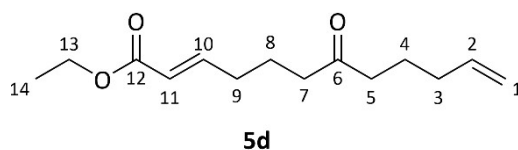

**5d** was obtained as a by-product from the synthesis of **5a** resulting in a brown oil (0.63 g, 22 %). **IR**  $\nu_{\max}$  (neat)/ $\text{cm}^{-1}$  2936, 1712, 1654, 1267, 1179; **NMR**  $\delta_{\text{H}}$  (400 MHz,  $\text{CDCl}_3$ ) 6.84 (1H, dddd,  $J$  15.6, 6.96, 10-H), 5.77-5.63 (2H, m, 2-H, 11-H), 4.96-4.87 (2H, m, 1- $\text{H}_2$ ), 4.10 (2H, q,  $J$  7.14, 13- $\text{H}_2$ ), 2.37-2.31 (4H, m, 5- $\text{H}_2$ , 7- $\text{H}_2$ ), 2.16-2.10 (2H, m, 9- $\text{H}_2$ ), 2.00-1.94 (2H, m, 3- $\text{H}_2$ ), 1.70-1.56 (4H, m, 4- $\text{H}_2$ , 8- $\text{H}_2$ ), 1.21 (3H, t,  $J$  7.14, 14- $\text{H}_3$ );  $\delta_{\text{C}}$  (75 MHz,  $\text{CDCl}_3$ ) 210.1 (6-C), 166.5 (12-C), 148.1 (10-C), 137.9 (2-C), 122.0 (11-C), 115.2 (1-C), 60.2 (13-C), 41.9 (5-C), 41.7 (7-C),

33.1 (3-C), 31.4 (9-C), 22.7 (8-C), 21.9 (4-C), 14.2 (14-C); **MS**  $m/z$  (EI) 238 ( $M^+$ ), 95 (100), 81 (71).

**Methyl (2E)-7-oxododeca-2,11-dienoate (5e)**

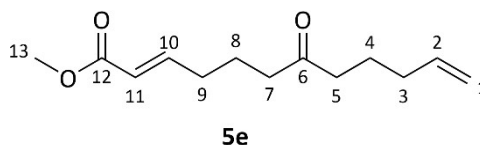

**5e** was obtained as a by-product from the synthesis of **5b**, resulting in a yellow oil 1.1g, 17 %. **IR**  $\nu_{\max}$  (neat)/ $\text{cm}^{-1}$  2949, 1717, 1657, 1270, 1197; **NMR**  $\delta_{\text{H}}$  (400 MHz,  $\text{CDCl}_3$ ) 6.84 (1H, dddd,  $J$  15.6, 6.96, 10-H), 5.75 (1H, dt,  $J$  15.6, 1.58, 11-H), 5.71-5.63 (1H, m, 2-H), 4.95-4.87 (2H, m, 1-H), 3.64 (3H, s, 13- $\text{H}_3$ ), 2.39-2.31 (4H, m, 5- $\text{H}_2$ , 7- $\text{H}_2$ ), 2.17-2.11 (2H, m, 9- $\text{H}_2$ ), 2.00-1.94 (2H, m, 3- $\text{H}_2$ ), 1.70-1.52 (4H, m, 8- $\text{H}_2$ , 4- $\text{H}_2$ );  $\delta_{\text{C}}$  (75 MHz,  $\text{CDCl}_3$ ) 210.0 (6-C), 166.8 (12-C), 148.4 (10-C), 137.8 (2-C), 121.4 (11-C), 115.1 (11-C), 51.3 (13-C), 41.8 (7-C), 41.6 (5-C), 33.0 (3-C), 31.3 (9-C), 22.6 (8-C), 21.8 (4-C); **MS**  $m/z$  (EI) 224 ( $M^+$  1), 81 (76), 69 (100), 55 (95)

**Ethyl (3a*S*,4*S*,7*S*,10a*S*)-7-(2-ethoxy-2-oxoethyl)octahydro-1*H*-yclopenta[3,4][1,2]oxazolo[2,3-*a*]pyridine-4-carboxylate (5c)**

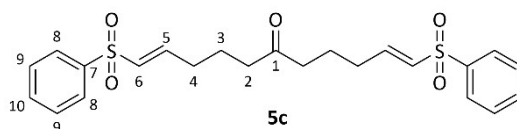

To a solution of Hoveyda Grubbs II catalyst (0.094 g, 5 mol %) in anhydrous DCM (20 mL) was added a solution of **4** (0.50 g, 3.0 mmol) in anhydrous DCM (15 mL), followed by phenyl vinyl sulfone (3.0 g, 18 mmol) and the resulting mixture left to stir @ 50 °C. At 24 hours a second portion of Hoveyda Grubbs II catalyst (0.094 g, 5 mol %) was added to the reaction mixture which was then left to stir for a further 7 days. The reaction was stopped and the solvent



evaporated *in vacuo* to give a brown oil. The crude product was purified via flash chromatography eluting with hexane/EtOAc 1:1 to give **5c** as a brown oil, 1.2 g, 88 %. **IR**  $\nu_{\max}$  (thin film)/ $\text{cm}^{-1}$ ) 2941, 1709, 1625, 1305, 1143; **NMR**  $\delta_{\text{H}}$  (400 MHz,  $\text{CDCl}_3$ ) 7.87-7.84 (4H, m, 8-H<sub>2</sub>), 7.62-7.58 (2H, m, 10-H), 7.55-7.50 (4H, m, 9-H<sub>2</sub>), 6.91 (2H, dt, *J* 15.1, 6.79, 5-H), 6.31 (2H, dt, *J* 15.1, 1.55, 6-H), 2.38 (4H, t, *J* 7.17, 2-H<sub>2</sub>), 2.25-2.19 (4H, m, 4-H<sub>2</sub>), 1.71 (4H, p, *J* 14.9, 3-H<sub>2</sub>);  $\delta_{\text{C}}$  (75 MHz,  $\text{CDCl}_3$ ) 208.7 (1-C), 145.9 (5-C), 140.5 (7-C), 133.4 (10-C), 131.1 (6-C), 129.3 (9-C), 127.6 (8-C), 41.5 (2-C), 30.6 (4-C), 21.3 (3-C); **MS** *m/z* (EI) 446 ( $\text{M}^+$ ), 144 (100).

2-[(3*aS*,4*S*,7*S*,10*aS*)-4-(hydroxymethyl)octahydro-1*H*-cyclopenta[3,4][1,2]oxazolo[2,3-*a*]pyridin-7-yl]ethan-1-ol (**6a**)

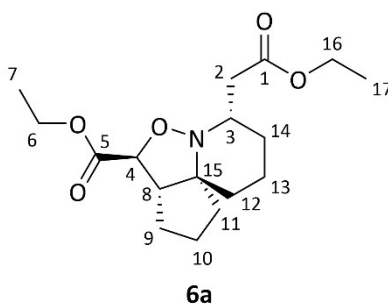

To a solution of  $\text{NH}_2\text{OH}\cdot\text{HCl}$  (0.36 g, 5.8 mmol) and  $\text{NaOAc}$  (1.0 g, 12 mmol) in anhydrous MeOH (50 mL) and anhydrous MeCN (10 mL) was added a solution of **5a** (0.80 g, 0.26 mmol) in anhydrous MeCN (5 mL) and the resulting mixture left to stir at r.t. Upon complete consumption of the starting material **5a** the reaction was stopped, and the solvent evaporated. The resulting orange solid was diluted with DCM (50 mL), filtered under suction and washed continuously with DCM until the solid became white in colour. The filtrate was concentrated, and the oil obtained dissolved in MeCN (50 mL). This solution was stirred at r.t and upon complete consumption of the intermediate nitron the reaction was stopped, concentrated *in vacuo*, refluxed in hexane for 20 minutes, filtered hot and concentrated to give **6a** as a yellow oil, 1.4 g, 87 %. **IR**  $\nu_{\max}$  (thin film)/ $\text{cm}^{-1}$  2939, 1731, 1445, 1262, 1184; **NMR**  $\delta_{\text{H}}$  (400 MHz,  $\text{CDCl}_3$ ) 4.25-4.08 (5H, m, 4-H, 6-H<sub>2</sub>, 16-H<sub>2</sub>), 3.16 (1H, dd, *J* 18.8, 12.3, 2<sub>B</sub>-H), 3.05-3.02 (1H, m, 8-H), 2.90-2.85 (1H, m, 3-H), 2.29 (1H, dd, *J* 9.96, 5.77, 2<sub>A</sub>-H), 2.05-1.35 (12H, m,

9-H<sub>2</sub>, 10-H<sub>2</sub>, 11-H<sub>2</sub>, 12-H<sub>2</sub>, 13-H<sub>2</sub>, 14-H<sub>2</sub>), 1.28-1.22 (6H, m, 7-H<sub>3</sub>, 17-H<sub>3</sub>);  $\delta_c$  (75 MHz, CDCl<sub>3</sub>) 173.0 (1-C), 172.2 (5-C), 83.4 (4-C), 77.5 (15-C), 61.4 (16-C), 60.5 (3-C), 60.1 (6-C), 51.0 (8-C), 39.2 (14-C), 39.1 (2-C), 33.0, 29.9, 29.2, 21.1, 20.6 (9-C to 14-C), 14.3 (17-C), 14.0 (7-C); **MS** *m/z* (EI) 325 (M<sup>+</sup>, 13), 252 (29), 238 (100), 210 (86).

**Methyl [(4*S*,7*S*,7*aS*,10*aS*)-7-hydroxy-6-oxodecahydrocyclopenta[*i*]indolizin-4-yl]acetate (6b)**

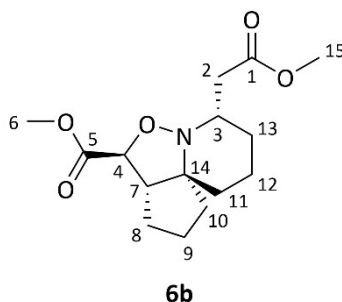

**6b** was obtained by reacting **5b** as described in the synthesis for **6a**, resulting in a yellow oil 1.9 g, 68 %. **IR**  $\nu_{\max}$  (neat)/cm<sup>-1</sup> 2948, 1730, 1436, 1262, 1163; **NMR**  $\delta_H$  (400 MHz, CDCl<sub>3</sub>) 4.12 (1H, d, *J* 6.42, 4-H), 3.72 (3H, s, 6-H<sub>3</sub>), 3.63 (3H, s, 15-H<sub>3</sub>), 3.13 (1H, dd, *J* 18.6, 12.3, 3.20, 2<sub>A</sub>-H), 3.02-2.99 (1H, m, 7-H), 2.88-2.82 (1H, m, 3-H), 2.28 (1H, dd, *J* 5.86, 2<sub>B</sub>-H), 1.95-1.21 (12H, m, 8-H<sub>2</sub>, 9-H<sub>2</sub>, 10-H<sub>2</sub>, 11-H<sub>2</sub>, 12-H<sub>2</sub>, 13-H<sub>2</sub>);  $\delta_c$  (75 MHz, CDCl<sub>3</sub>), 171.5 (1-C), 170.7 (5-C), 81.4 (4-C), 75.7 (14-C), 58.6 (3-C), 50.5 (6-C), 49.5 (15-C), 49.2 (7-C), 37.3 (13-C), 37.0 (2-C), 31.0, 28.1, 27.3, 19.2, 18.7 (8-C to 12-C); **MS** *m/z* (EI) 297 (M<sup>+</sup> 16), 266 (5), 238 (25); **HRMS**: Found 373.2208 C<sub>22</sub>H<sub>29</sub>O<sub>3</sub>N, [M+H]<sup>+</sup> Requires 373.2203.

**(3*aS*,7*S*,10*aS*)-4-(benzenesulfonyl)-7-[(benzenesulfonyl)methyl]octahydro-1H-cyclopenta[3,4][1,2]oxazolo[2,3-*a*]pyridine (6c)**

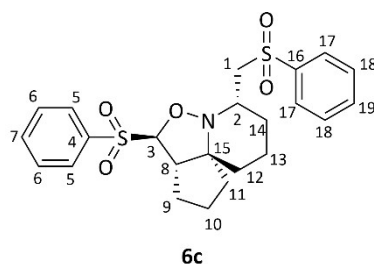

To a solution of  $\text{NH}_2\text{OH}\cdot\text{HCl}$  (0.037 g, 0.54 mmol) and  $\text{NaOAc}$  (0.092 g, 1.1 mmol) in anhydrous MeCN (9 mL) and anhydrous MeOH (7 mL) was added a solution of **5c** (0.20 g, 0.45 mmol) in anhydrous MeCN (1 mL) and the resulting mixture left to stir at r.t. overnight. Upon complete consumption of the starting material the solvent was evaporated and the resulting brown solid diluted with DCM (50 mL), filtered under suction and washed continuously with DCM until the solid became white in colour. The filtrate was concentrated, dissolved in MeCN (20 mL) and stirred at 50 °C for 3 hours. The crude mixture was concentrated and purified via flash chromatography eluting with hexane/EtOAc 1:2 to give **6c** as a yellow oil, 0.077 g, 37 %. **IR**  $\nu_{\text{max}}$  (thin film)/ $\text{cm}^{-1}$ ) 2927, 1629, 1305, 1146, 1085; **NMR**  $\delta_{\text{H}}$  (400 MHz,  $\text{CDCl}_3$ ) 7.95-7.87 (4H, m, 5- $\text{H}_2$ , 17- $\text{H}_2$ ), 7.68-7.59 (2H, m, 7-H, 19-H), 7.56-7.52 (4H, m, 6- $\text{H}_2$ , 18- $\text{H}_2$ ), 4.47 (1H, d,  $J$  7.41, 3-H), 3.85-3.80 (1H, m, 2-H), 3.53 (1H, dd,  $J$  14.2, 2.61, 1<sub>B</sub>-H), 3.32 (1H, t,  $J$  6.62, 8-H), 3.20 (1H, dd,  $J$  14.2, 9.41, 1<sub>A</sub>-H), 2.35-2.30 (1H, m, 14<sub>B</sub>-H), 1.97-1.39 (11H, m, 9- $\text{H}_2$ , 10- $\text{H}_2$ , 11- $\text{H}_2$ , 12- $\text{H}_2$ , 13- $\text{H}_2$ , 14<sub>A</sub>-H);  $\delta_{\text{C}}$  (75 MHz,  $\text{CDCl}_3$ ) 141.0 (4-C), 137.6 (16-C), 134.2 (7-C), 133.6 (19-C), 129.3 (6-C), 129.2 (18-C), 129.0 (5-C), 127.8 (17-C), 99.7 (3-C), 77.3 (15-C), 60.4 (1-C), 60.3 (2-C), 48.6 (8-C), 38.5, 32.0, 29.7, 28.0, 20.3, 19.4 (9-C to 14-C); **MS**  $m/z$  (FT) 462 ( $[\text{M}+\text{H}]^+$  100), 320 (100), **HRMS** Found 462.1396.  $\text{C}_{23}\text{H}_{27}\text{O}_5\text{S}_2\text{N}$   $[\text{M}+\text{H}]^+$ , requires 462.1403.

*Ethyl [(3aS,7S,10aS)-octahydro-1H-cyclopenta[3,4][1,2]oxazolo[2,3-a]pyridin-7-yl]acetate*  
**(6d)**

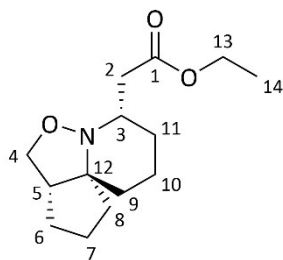

**6d**

To a solution of  $\text{NH}_2\text{OH}\cdot\text{HCl}$  (0.070 g, 1.0 mmol) and  $\text{NaOAc}$  (0.17 g, 2.1 mmol) in absolute EtOH (25 mL) was added a solution of **5d** in absolute EtOH (10 mL) and the resulting solution was refluxed for 4 hours. The reaction was stopped and the solvent evaporated to give **6d** as a yellow oil, 0.20 g, 94 %. **IR**  $\nu_{\text{max}}$  (thin film)/ $\text{cm}^{-1}$ ) 2936, 1730, 1184, 1120; **NMR**  $\delta_{\text{H}}$  (400 MHz,  $\text{CDCl}_3$ ) 4.22 (1H, t,  $J$  8.83,  $4_{\text{A-H}}$ ), 4.05 (2H, q,  $J$  7.13,  $13\text{-H}_2$ ), 3.34 (1H, dd,  $J$  4.39,  $4_{\text{B-H}}$ ), 2.96-2.89 (1H, m, 3-H), 2.72 (1H, dd,  $J$  15.3, 5.88,  $2_{\text{A-H}}$ ), 2.64-2.60 (1H, m, 5-H), 2.16 (1H, dd,  $J$  15.3, 4.78,  $2_{\text{B-H}}$ ), 1.93-1.24 (12H, m, 6- $\text{H}_2$ , 7- $\text{H}_2$ , 8- $\text{H}_2$ , 9- $\text{H}_2$ , 10- $\text{H}_2$ , 11- $\text{H}_2$ ), 1.19 (3H, t,  $J$  7.13,  $14\text{-H}_3$ );  $\delta_{\text{C}}$  (75 MHz,  $\text{CDCl}_3$ ) 172.8 (1-C), 77.2 (12-C), 71.8 (4-C), 60.3 (13-C), 57.4 (3-C), 47.1 (5-C), 41.6 (6-C), 40.6 (2-C), 33.9, 31.5, 30.4, 22.7, 21.3 (7-C to 11-C), 14.2 (14-C); **MS**  $m/z$  (EI) 253 ( $\text{M}^+$ , 9), 224 (10), 208 (11), 166 (100).

*Methyl [(3a*S*,7*S*,10a*S*)-octahydro-1*H*-cyclopenta[3,4][1,2]oxazolo[2,3-*a*]pyridin-7-yl]acetate*  
**(6e)**

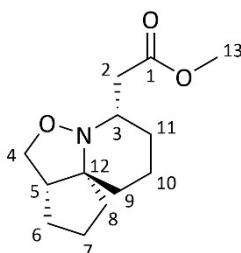

**6e**

**6e** was obtained by reacting **5e** in the synthesis described for **6d** resulting in a yellow oil 0.37 g, 37 %. **IR**  $\nu_{\text{max}}$  (thin film)/ $\text{cm}^{-1}$ ) 2944, 1733, 1435, 1249, 1159; **NMR**  $\delta_{\text{H}}$  (400 MHz,  $\text{CDCl}_3$ ) 4.21 (1H, t,  $J$  8.34,  $4_{\text{A-H}}$ ), 3.59 (3H, s,  $13\text{-H}_3$ ), 3.33 (1H, dd,  $J$  12.9, 8.39, 4.08,  $4_{\text{B-H}}$ ), 2.96-2.90 (1H, m, 3-H). 2.72 (1H, dd,  $J$  15.2, 5.74,  $2_{\text{B-H}}$ ). 2.64-2.60 (1H, m, 5-H), 2.18 (1H, dd,  $J$  15.2, 6.55,  $2_{\text{A-H}}$ ), 1.92-1.19 (12H, m, 6- $\text{H}_2$ , 7- $\text{H}_2$ , 8- $\text{H}_2$ , 9- $\text{H}_2$ , 10- $\text{H}_2$ , 11- $\text{H}_2$ );  $\delta_{\text{C}}$  (75 MHz,  $\text{CDCl}_3$ ) 173.1 (1-C),

77.1 (12-C), 71.7 (4-C), 57.4 (3-C), 51.5 (13-C), 47.0 (5-C), 41.5, 40.3, 33.8, 31.4, 30.4, 22.6, 21.3 (2-C and 6C to 11-C); **MS**,  $m/z$  (EI), 239 ( $M^+ 10$ ), 166 (100).

2-[(3*aS*,7*S*,10*aS*)-octahydro-1*H*-cyclopenta[3,4][1,2]oxazolo[2,3-*a*]pyridin-7-yl]ethan-1-ol (**7**)

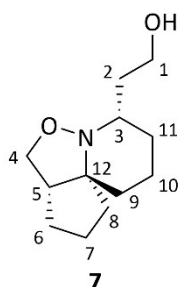

To a solution of **6d** (0.051 g, 0.20 mmol) in anhydrous DCM (5 mL) pre-cooled to 0 °C was added DIBAL-H (0.23 mL, 0.22 mmol) in one portion and the resulting mixture left to stir at 0 °C for 2.5 hours. The reaction was quenched with MeOH (5 mL), diluted with dH<sub>2</sub>O (5 mL) and left to stir for 10 minutes. The solution was added to HCl (5 mL, 10 % sol'n) and the pH raised to 10 with the addition of NaOH (1M). The mixture was diluted with EtOAc (15 mL), extracted with EtOAc (3 x 15 mL), organic fractions combined, dried over MgSO<sub>4</sub>, filtered and concentrated to give **7** as a brown oil 0.025 g, 59 %. **IR**  $\nu_{\max}$  (thin film)/cm<sup>-1</sup> 3360-OH, 2932, 2863, 1444, 1054; **NMR**  $\delta_{\text{H}}$  (400 MHz, CDCl<sub>3</sub>) 4.25 (1H, t, *J* 8.80, 4<sub>A</sub>-H), 3.92-3.86 (1H, m, 1<sub>A</sub>-H), 3.67-3.62 (1H, m, 1<sub>B</sub>-H), 3.43 (1H, dd, *J* 8.62, 4.37, 4<sub>B</sub>-H), 2.82-2.77 (1H, m, 3-H), 2.67-2.62 (1H, m, 5-H), 2.10-2.02 (1H, m, 2<sub>A</sub>-H). 1.97-1.83 (2H, m, 6<sub>B</sub>-H, 11-H), 1.77-1.30 (12H, m, 2<sub>B</sub>-H, 6<sub>A</sub>-H, 7-H<sub>2</sub>, 8-H<sub>2</sub>, 9-H<sub>2</sub>, 10-H<sub>2</sub>, 11-H<sub>2</sub>);  $\delta_{\text{C}}$  (75 MHz, CDCl<sub>3</sub>), 76.7 (12-C), 71.5 (4-C), 60.4 (1-C), 58.9 (3-C), 47.8 (5-C), 41.8 (6-C), 35.6 (2-C), 33.8 (11-C), 31.5, 28.9, 22.9, 21.1 (7-C to 10-C); **MS** *m/z* (EI) 211 (M<sup>+</sup>, 8), 166 (100); **HRMS** Found 212.1642, C<sub>12</sub>H<sub>22</sub>NO<sub>2</sub>, [M+H]<sup>+</sup>, Requires 212.1645.

Methyl [(3*a*S,4*S*,7*S*,10*a*S)-4-(hydroxymethyl)octahydro-1*H*-cyclopenta[3,4][1,2]oxazolo[2,3-*a*]pyridin-7-yl]acetate (**8**)

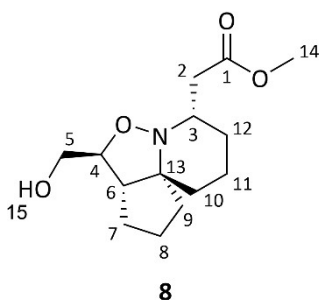

A solution of **6a** (0.53 g, 1.9 mmol) in anhydrous MeOH (40 mL) was added to Pd/C (0.53 g, 100 % wt) and left to stir under an atmosphere of H<sub>2</sub> at r.t for 18 hours. The catalyst was filtered off and the solvent evaporated under reduced pressure. The crude was purified via flash chromatography eluting with DCM/MeOH 9:1 to give **8** as a colourless oil, 0.085 g, 20 %. **IR**  $\nu_{\max}$  (thin film)/cm<sup>-1</sup> 3436-OH, 2937, 1732, 1436, 1195, 1114; **NMR**  $\delta_{\text{H}}$  (400 MHz, CDCl<sub>3</sub>), 4.60 (1H, s (br), 15-H), 4.51 (1H, d, *J* 9.80, 5<sub>A</sub>-H), 4.39 (1H, d, *J* 9.90, 5<sub>B</sub>-H), 3.66 (3H, s, 14-H<sub>3</sub>), 3.54-3.48 (1H, m, 4-H), 3.32-3.28 (1H, m, 3-H), 2.48 (1H, dd, *J* 14.3, 9.86, 2-H), 2.34 (1H, dd, *J* 14.3, 8.85, 2-H), 2.14-2.07 (1H, m, 12<sub>A</sub>-H), 1.85-1.38 (12H, m, 6-H, 7-H<sub>2</sub>, 8-H<sub>2</sub>, 9-H<sub>2</sub>, 10-H<sub>2</sub>, 11-H<sub>2</sub>, 12<sub>B</sub>-H);  $\delta_{\text{C}}$  (75 MHz, CDCl<sub>3</sub>) 172.9 (1-C), 78.5 (4-C), 77.2 (5-C), 77.1 (13-C), 52.7 (3-C), 51.7 (13-C), 40.7 (6-C), 37.7 (2-C), 36.1, 30.8, 28.2, 23.7, 19.9, 17.6 (7-C to 12-C); **MS** *m/z* (EI) 252 (24), 224 (19), 210 (69), 196 (31); **HRMS** Found 270.1698, C<sub>14</sub>H<sub>24</sub>NO<sub>4</sub>, [M+H]<sup>+</sup>, Requires 270.1700.

*Methyl {(1S,5S,7S)-1-[(1S)-1,2-dihydroxyethyl]-6-azaspiro[4.5]decan-7-yl}acetate (9)*

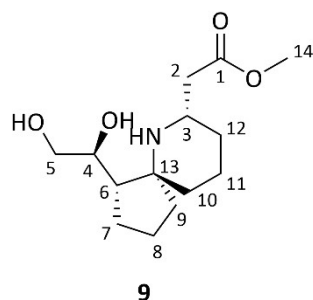

A solution of **8** (0.76 g, 2.7 mmol) in anhydrous MeOH (40 mL) followed by Pd/C (0.76 g, 100 % wt) was added to a pressure reactor and stirred at r.t for 18 hours under an atmosphere of H<sub>2</sub> at 5 bar pressure. The catalyst was filtered off and the solvent evaporated under reduced pressure. The crude mixture was purified via flash chromatography eluting with DCM/MeOH 7:3 to give **9** as a white residue 0.13 g, 17 %. **IR**  $\nu_{\max}$  (thin film)/cm<sup>-1</sup> 3311, 2931, 1728, 1195, 1173, 1116, 1070; **NMR**  $\delta_{\text{H}}$  (400 MHz, CDCl<sub>3</sub>), 3.71-3.67 (2H, m, 4-H, 5<sub>B</sub>-H), 3.65 (3H, s, 14-H<sub>3</sub>), 3.46-3.42 (1H, m, 5<sub>A</sub>-H), 3.32-3.26 (1H, m, 3-H<sub>3</sub>), 2.46-2.42 (2H, m, 2-H<sub>2</sub>), 2.13-2.09 (1H, m, 6-H), 1.87-1.29 (12H, m, 7-H<sub>2</sub>, 8-H<sub>2</sub>, 9-H<sub>2</sub>, 10-H<sub>2</sub>, 11-H<sub>2</sub>, 12-H<sub>2</sub>);  $\delta_{\text{C}}$  (75 MHz, CDCl<sub>3</sub>) 172.1 (1-C), 77.3 (13-C), 74.0 (4-C), 65.3 (5-C), 51.8 (14-C), 50.3 (3-C), 41.0 (6-C), 40.3 (2-C), 38.6, 36.0, 30.9, 26.6, 20.0, 19.6 (7-C to 12-C); **MS** (EI), 271 (M<sup>+</sup> 3), 254 (34), 240 (67), 224 (13), 198 (40); **HRMS** Found 272.1858 C<sub>4</sub>H<sub>25</sub>NO<sub>4</sub>, [M+H]<sup>+</sup>, Requires 272.1856.



*Methyl [(4S,7S,7aS,10aS)-7-hydroxy-6-oxodecahydrocyclopenta[i]indolizin-4-yl]acetate (10)*

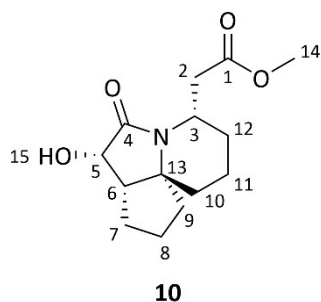

A solution of **6b** (0.11 g, 0.36 mmol) in anhydrous MeOH (8 mL) was added to Pd/C (0.11 g, 100 % wt) and the solution was left to stir at r.t under an atmosphere of H<sub>2</sub> for 18 hours. The catalyst was filtered off and the solvent evaporated under reduced pressure to give **10** as a colourless residue 0.071 g, 73 %. **IR**  $\nu_{\max}$  (thin film)/cm<sup>-1</sup> 3307-OH, 2945, 1733, 1663; **NMR**  $\delta_{\text{H}}$  (400 MHz, CDCl<sub>3</sub>), 4.74-4.68 (1H, m, 3-H), 4.61 (1H, S-br, 15-H), 4.32 (1H, d, *J* 9.83, 5-H), 3.65 (3H, s, 14-H<sub>3</sub>), 2.61 (2H, ddd, *J* 15.1, 2-H<sub>2</sub>), 2.39-2.33 (1H, m, 6-H), 2.01-1.95 (1H, m, 12-H), 1.82-1.28 (11H, m, 7-H<sub>2</sub>, 8-H<sub>2</sub>, 9-H<sub>2</sub>, 10-H<sub>2</sub>, 11-H<sub>2</sub>, 12-H<sub>1</sub>);  $\delta_{\text{C}}$  (75 MHz, CDCl<sub>3</sub>) 174.2 (1-C), 171.2 (4-C), 69.4 (13-C), 69.1 (5-C), 51.8 (14-C), 48.3 (6-C), 45.7 (3-C), 38.8, 37.3, 36.8, 27.8, 25.9, 23.8, 17.3 (2-C and 7-C to 12-C), **MS** (EI) 267 (M<sup>+</sup> 36).

Ethyl [(3*aS*,4*S*,7*S*,10*aS*)-4-(hydroxymethyl)octahydro-1*H*-cyclopenta[3,4][1,2]oxazolo[2,3-*a*]pyridin-7-yl]acetate (**11**)

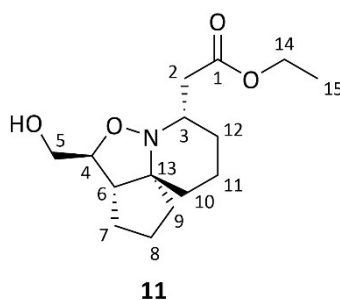

To solution of **6a** (1.1 g, 3.7 mmol) in absolute EtOH (30 mL) pre-cooled to 0 °C was added NaBH<sub>4</sub> (0.43 g, 11 mmol) in one portion. The reaction mixture was warmed to r.t and left to stir for 48 hours. The reaction was quenched with acetone (30 mL) and left to stir at r.t for 1 hour. The solvent was evaporated, and the resulting white solid dissolved in dH<sub>2</sub>O (30 mL). The crude was extracted with EtOAc (3 x 40 mL), dried over MgSO<sub>4</sub>, filtered and concentrated to give a yellow oil. The crude was purified via flash chromatography eluting with hexane/EtOAc 1:1 to give **11** as a colourless oil 0.60 g, 63 %. **IR**  $\nu_{\max}$  (thin film)/cm<sup>-1</sup> 3435- OH, 2934, 1730, 1299, 1170, 1130; **NMR**  $\delta_{\text{H}}$  (400 MHz, CDCl<sub>3</sub>) 4.16-4.03 (2H, m, 14-H<sub>2</sub>), 3.73-3.64 (2H, m, 4-H, 5<sub>A</sub>-H), 3.57-3.51 (1H, m, 5<sub>B</sub>-H), 3.21-3.15 (1H, m, 3-H), 2.66-2.60 (2H, m, 2<sub>B</sub>-H, 6-H), 2.22 (1H, dd, *J* 14.9, 3.90, 2<sub>A</sub>-H), 2.03-1.95 (1H, m, 12<sub>B</sub>-H), 1.66-1.23 (11H, m, 7-H<sub>2</sub>, 8-H<sub>2</sub>, 9-H<sub>2</sub>, 10-H<sub>2</sub>, 11-H<sub>2</sub>, 12<sub>A</sub>-H), 1.21 (3H, t, *J* 7.15, 15-H<sub>3</sub>);  $\delta_{\text{C}}$  (75 MHz, CDCl<sub>3</sub>) 174.9 (1-C), 88.0 (4-C), 76.7 (13-C), 62.1 (5-C), 61.8 (3-C), 61.0 (14-C), 46.1 (6-C), 42.0 (2-C), 38.0 (12-C), 31.9, 31.1, 26.6, 20.3, 20.2 (7-C to 11-C), 14.0 (15-C); **MS** *m/z* (EI) 283 (M<sup>+</sup>, 14), 210 (40), 196 (100).

*Ethyl* {(1*S*,5*S*,7*S*)-1-[(1*S*)-1,2-dihydroxyethyl]-6-azaspiro[4.5]decan-7-yl}acetate (**12**)

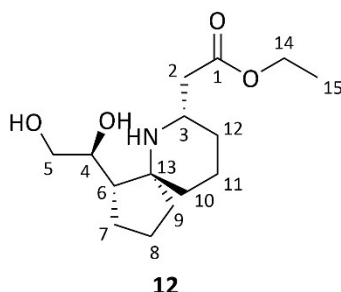

A solution of **11** (0.62 g, 2.2 mmol) in anhydrous MeOH (40 mL) was added to Pd/C (0.25 g, 40 % wt) and the reaction mixture left to stir under an atmosphere of H<sub>2</sub> at r.t. Upon complete consumption of the starting material the reaction was stopped, and the mixture filtered to remove the catalyst. The solvent was evaporated to give **12** as a viscous opaque oil, 0.61 g, 99 %. **IR**  $\nu_{\text{max}}$  (thin film)/cm<sup>-1</sup> 3304, 2934, 1731, 1253, 1185; **NMR**  $\delta_{\text{H}}$  (400 MHz, CDCl<sub>3</sub>) 4.15-4.09 (2H, m, 14-H<sub>2</sub>), 3.90-3.86 (1H, m, 4-H), 3.78-3.72 (2H, m, 3-H, 5-H), 3.48 (1H, dd, *J* 11.4, 5.30 5-H), 2.92-2.85 (1H, m, 2<sub>B</sub>-H) 2.68 (1H, dd, *J* 16.0, 8.60, 2<sub>A</sub>-H), 2.24-2.20 (1H, m, 6-H), 2.14-2.08 (1H, m, 12<sub>B</sub>-H), 1.90-1.45 (11H, m, 7-H<sub>2</sub>, 8-H<sub>2</sub>, 9-H<sub>2</sub>, 10-H<sub>2</sub>, 11-H<sub>2</sub>, 12<sub>A</sub>-H), 1.23 (3H, t, *J* 7.15, 15-H);  $\delta_{\text{C}}$  (75 MHz, CDCl<sub>3</sub>), 170.5 (1-C), 72.7 (4-C), 66.8 (13-C), 65.5 (5-C), 60.9 (14-C), 51.5 (3-C), 42.2 (6-C), 38.3 (2-C), 36.5 (12-C), 34.3, 28.5, 26.1, 19.5, 19.0 (7-C to 11-C), 14.2 (15-C); **MS** *m/z* (EI) 285 (M<sup>+</sup> 6), 268 (38), 254 (84).

Ethyl [(4*S*,7*S*,7*aS*,10*aS*)-7-hydroxy-6-oxodecahydrocyclopenta[*i*]indolizin-4-yl]acetate (**13**)

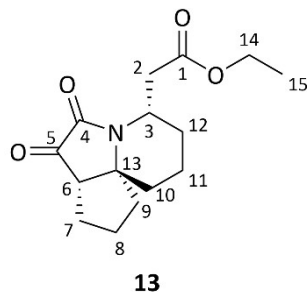

To a stirring solution of DMSO (0.16 g, 0.41 mL, 5.7 mmol) in anhydrous DCM (2 mL), pre-cooled to  $-84\text{ }^{\circ}\text{C}$  was added oxalyl chloride (0.22 g, 0.50 mL, 5.8 mmol) in one portion. After stirring at  $-84\text{ }^{\circ}\text{C}$  for one hour **12** (0.20 g, 0.70 mmol) was added dropwise over 30 minutes and the mixture left to stir at  $-15\text{ }^{\circ}\text{C}$  for one hour. The reaction temperature was lowered to  $-84\text{ }^{\circ}\text{C}$  followed by the addition of  $\text{Et}_3\text{N}$  (0.43 g, 0.60 mL, 4.2 mmol) dropwise over 30 minutes. Upon complete addition the reaction temperature was raised to r.t and the mixture was left to stir for a further 45 minutes. The reaction was quenched with  $\text{dH}_2\text{O}$  (8 mL) and left to stir for 1 hour, followed by dilution with DCM (15 mL). The crude product was extracted with DCM (2 x 25 mL), washed with brine (15 mL), dried over  $\text{MgSO}_4$ , filtered and concentrated to give **13** as an orange oil. The crude product was purified via flash chromatography eluting with hexane/EtOAc 4:1 to give a yellow oil, 0.027 g, 27 %. **IR**  $\nu_{\text{max}}$  (thin film)/ $\text{cm}^{-1}$ ) 2934, 2870, 1758, 1728, 1703, 1448, 1174; **NMR**  $\delta_{\text{H}}$  (400 MHz,  $\text{CDCl}_3$ ) 5.02-4.96 (1H, m, 3-H), 4.17-4.05 (2H, m, 14- $\text{H}_2$ ), 2.75-2.61 (2H, m, 2- $\text{H}_2$ ), 2.50 (1H, dd,  $J$  9.54, 4.90, 6-H), 2.04-1.57 (12H, m, 7- $\text{H}_2$ , 8- $\text{H}_2$ , 9- $\text{H}_2$ , 10- $\text{H}_2$ , 11- $\text{H}_2$ , 12- $\text{H}_2$ ), 1.23 (3H, t,  $J$  7.14, 15- $\text{H}_3$ );  $\delta_{\text{C}}$  (75 MHz,  $\text{CDCl}_3$ ) 202.0 (5-C), 170.2 (1-C), 158.8 (4-C), 66.3 (13-C), 61.1 (14-C), 55.0 (6-C), 46.4 (3-C), 37.9 (2-C), 37.6, 37.3, 28.1, 27.6, 26.3, 16.7 (7C to 12-C), 14.2 (15-C); **MS**  $m/z$  (EI) 279 ( $\text{M}^+$  82).

Ethyl [(3*aS*,4*S*,7*S*,10*aS*)-4-[[[4-methylbenzene-1-sulfonyl]oxy]methyl]octahydro-1*H*-cyclopenta[3,4][1,2]oxazolo[2,3-*a*]pyridin-7-yl]acetate (**14**)

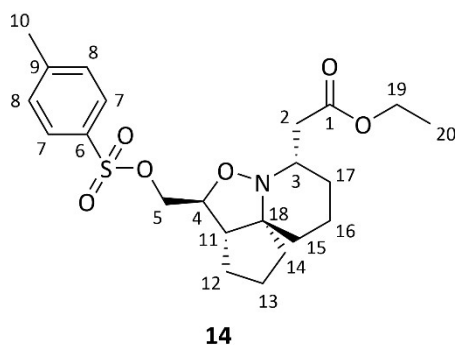

To a solution of **11** (0.10 g, 0.39 mmol) in anhydrous DCM (6 mL) was added Et<sub>3</sub>N (0.051 g, 0.07 mL, 0.51 mmol) and the resulting mixture was left to stir at r.t for 30 minutes. The temperature was lowered to 0 °C, followed by the addition of TsCl (0.071 g, 0.37 mmol) and the mixture left to stir at the same temperature for 5 minutes, then warmed to r.t and left to stir for 2 weeks. The reaction was stopped and quenched with brine (10 mL) at 0 °C, extracted with DCM (2 x 30 mL), organics combined, dried over MgSO<sub>4</sub>, filtered and concentrated to give a yellow residue. The crude was purified via flash chromatography eluting with hexane / EtOAc 1:1 to give **14** as a colourless oil, 0.60 g, 41 %. **IR**  $\nu_{\text{max}}$  (thin film)/cm<sup>-1</sup> 2938, 1728, 1364, 1189, 1175, 1096; **NMR**  $\delta_{\text{H}}$  (400 MHz, CDCl<sub>3</sub>), 7.81-7.78 (2H, m, 7-H<sub>2</sub>), 7.35-7.32 (2H, m, 8-H<sub>2</sub>), 4.16 (2H, d, *J* 6.08, 5-H<sub>2</sub>), 4.08 (2H, q, *J* 7.14, 19-H<sub>2</sub>), 3.81-3.76 (1H, m, 4-H), 2.95-2.88 (1H, m, 3-H), 2.75 (1H, dd, *J* 15.1, 2<sub>A</sub>-H), 2.46-2.41 (4H, m, 10-H<sub>2</sub>, 11-H<sub>2</sub>), 2.20 (1H, dd, *J* 15.1, 8.30, 2<sub>B</sub>-H), 1.96-1.45 (12H, m, 12-H<sub>2</sub>, 13-H<sub>2</sub>, 14-H<sub>2</sub>, 15-H<sub>2</sub>, 16-H<sub>2</sub>, 17-H<sub>2</sub>), 1.23 (3H, t, *J* 7.14, 20-H<sub>3</sub>);  $\delta_{\text{C}}$  (75 MHz, CDCl<sub>3</sub>) 172.2 (1-C), 144.9 (6-C), 133.0 (9-C), 129.9 (8-C), 128.0 (7-C), 82.5 (4-C), 76.7 (18-C), 71.6 (5-C), 61.4 (3-C), 60.3 (19-C), 51.2 (11-C), 40.1 (2-C), 38.3, 31.6, 29.2, 27.7, 21.7, 21.3, 19.6 (10-C and 12-C to 14-C), 14.2 (20-C); **MS** *m/z* (EI) 237 (M<sup>+</sup> 12), 208 (14), 194 (100), **HRMS** Found 438.1938, C<sub>22</sub>H<sub>32</sub>NO<sub>6</sub>S, [M+H]<sup>+</sup> Requires 438.1945.

2-[(3*a*S,4*S*,7*S*,10*a*S)-4-(hydroxymethyl)octahydro-1*H*-cyclopenta[3,4][1,2]oxazolo[2,3-*a*]pyridin-7-yl]ethan-1-ol (**15**)

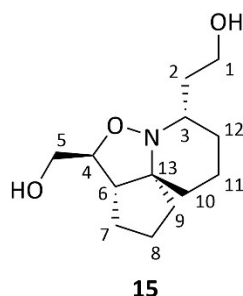

To a solution of **6a** (0.90 g, 2.8 mmol) in anhydrous DCM (25 mL) pre-cooled to 0 °C was added a solution of Red-Al in PhMe (60 % wt, 1.6 mL, 8.3 mmol) dropwise. Upon complete addition, the cooling bath was removed and the mixture left to stir for 10 minutes. The mixture was quenched with Rochelle's salt (10 % sol'n, 40 mL) and left to stir overnight. The organic phase was extracted with DCM (7 x 50 mL), combined, dried over MgSO<sub>4</sub>, filtered and concentrated to give a yellow oil. The crude mixture was purified via flash chromatography, eluting with DCM/MeOH 8:2 to give **15** as an opaque oil, 0.40 g, 55 %. **IR**  $\nu_{\text{max}}$  (thin film)/cm<sup>-1</sup>, 3330-OH, 2929, 2868, 1445, 1124, 1056; **NMR**  $\delta_{\text{H}}$  (400 MHz, CDCl<sub>3</sub>), 3.95-3.90 (1H, m, 1<sub>A</sub>-H), 3.82-3.79 (1H, dd, *J* 9.51, 3.81, 5<sub>B</sub>-H), 3.74-3.70 (1H, m, 4-H), 3.66-3.57 (2H, m, 1<sub>B</sub>-H, 5<sub>A</sub>-H), 3.05-2.99 (1H, m, 3-H), 2.53-2.50 (1H, m, 6-H), 2.04-1.97 (1H, m, 12<sub>A</sub>-H), 1.94-1.34 (13H, m, 2-H<sub>2</sub>, 7H<sub>2</sub>, 8-H<sub>2</sub>, 9-H<sub>2</sub>, 10-H<sub>2</sub>, 11-H<sub>2</sub>, 12<sub>B</sub>-H);  $\delta_{\text{C}}$  (75 MHz, CDCl<sub>3</sub>) 86.1 (4-C), 76.6 (13-C), 62.9, (5-C) 60.9 (3-C), 60.3 (1-C), 49.6 (6-C), 38.3 (12-C), 37.0 (2-C), 31.2, 28.5, 27.5, 21.8, 19.4 (7-C to 11-C), **HRMS** Found 264.1567 C<sub>13</sub>H<sub>23</sub>NO<sub>3</sub>Na, [M + Na]<sup>+</sup>, Requires 264.1570.

#### Synthesis for compounds **17a-l**

To a solution of **15** (1 eq) in anhydrous DCM (4 mL) cooled to 0 °C was added Et<sub>3</sub>N (2 eq) followed by a solution of acid chloride (see each compound below for equivalents of acid chloride) in anhydrous DCM (2 mL) dropwise. Once the addition was complete the cooling

bath was removed, and the mixture left to stir at r.t. Upon complete consumption of the starting material the reaction was quenched with dH<sub>2</sub>O (20 mL) and washed with dH<sub>2</sub>O (3 x 20 mL). The crude was extracted with DCM (3 x 20 mL), the organic fractions combined, dried over MgSO<sub>4</sub>, filtered and concentrated. The crude mixture was purified via flash chromatography eluting with hexane/EtOAc 1:1.

*{{(3a*S*,4*S*,7*S*,10a*S*)-7-[2-(benzoyloxy)ethyl]octahydro-1*H*-cyclopenta[3,4][1,2]oxazolo[2,3-*a*]pyridin-4-yl}methyl benzoate (17a)*

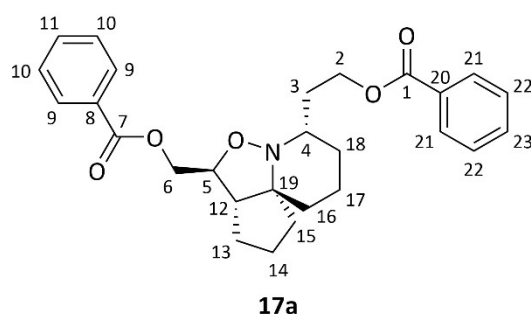

**15** (1 eq) was treated with benzoyl chloride (1.1 eq) to give **17a** as an opaque oil, 0.18 g, 54 %. **IR**  $\nu_{\max}$  (thin film)/cm<sup>-1</sup>, 2938, 2866, 1714, 1601, 1450, 1176, 1111; **NMR**  $\delta_{\text{H}}$  (400 MHz, CDCl<sub>3</sub>) 8.05-7.99 (4H, m, 9-H, 21-H), 7.55-7.47 (2H, m, 1-H, 23-H), 7.43-7.36 (4H, m, 8-H, 22-H), 4.55-4.37 (4H, m, 6-H<sub>2</sub>, 2-H<sub>2</sub>), 4.00-3.95 (1H, m, 5-H), 2.97-2.90 (1H, m, 4-H), 2.52-2.48 (1H, m, 12-H), 2.31-2.23 (1H, m, 18<sub>A</sub>-H), 1.97-1.33 (13H, m, 13-H<sub>2</sub>, 14-H<sub>2</sub>, 15-H<sub>2</sub>, 16-H<sub>2</sub>, 17-H<sub>2</sub>, 18<sub>B</sub>-H, );  $\delta_{\text{C}}$  (75 MHz, CDCl<sub>3</sub>) 196.6 (1-C), 166.6 (7-C), 133.1 (11-C), 132.7 (23-C), 130.5 (8-C), 129.9 (20-C), 129.7 (9-C), 129.5 (21-C), 128.4 (10-C), 128.3 (22-C), 82.6 (5-C), 76.3 (19-C), 66.9 (6-C), 62.8 (2-C), 60.8 (4-C), 52.6 (12-C), 38.6, 34.4, 31.5, 28.1, 22.3, 19.5 (13-C to 18-C); **MS** *m/z* (FT) 472 ([M + Na]<sup>+</sup> 13), 450 (100), 328 (100); **HRMS** Found 450.2269 C<sub>27</sub>H<sub>31</sub>NO<sub>5</sub>, [M+H]<sup>+</sup>, Requires 450.2275.

[(3*aS*,4*S*,7*S*,10*aS*)-7-{2-[(4-methoxybenzoyl)oxy]ethyl}octahydro-1*H*-cyclopenta[3,4][1,2]oxazolo[2,3-*a*]pyridin-4-yl)methyl 4-methoxybenzoate (**17b**)

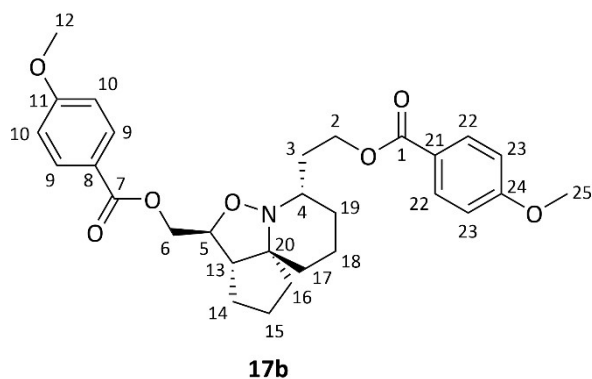

**15** (1 eq) was treated with 4-methoxybenzoyl chloride (1.1 eq) to give **17b** as a colourless oil 0.013 g, 6.0%. **IR**  $\nu_{\max}$  (thin film)/ $\text{cm}^{-1}$ , 2924, 2850, 1711, 1606, 1511, 1460, 1257, 1167; **NMR**  $\delta_{\text{H}}$  (400 MHz,  $\text{CDCl}_3$ ) 8.01-7.95 (4H, m, 9-H, 13-H), 6.93-6.96 (4H, m, 10-H, 23-H), 4.51 (1H, dd,  $J$  4.80, 6<sub>A</sub>-H), 4.47-4.35 (3H, m, 2-H, 6<sub>B</sub>-H), 4.00-3.95 (1H, m, 5-H), 3.85 (3H, s, 12-H<sub>3</sub>), 3.83 (3H, s, 25-H<sub>3</sub>). 2.95-2.89 (1H, m, 4-H), 2.53-2.49 (1H, 13-H), 2.32-2.24 (1H, m, 19<sub>A</sub>-H), 2.05-1.29 (13H, m, 3-H<sub>2</sub>, 14-H<sub>2</sub>, 15-H<sub>2</sub>, 16-H<sub>2</sub>, 17-H<sub>2</sub>, 18-H<sub>2</sub>, 19<sub>B</sub>-H);  $\delta_{\text{C}}$  (75 MHz,  $\text{CDCl}_3$ ) 166.4 (7-C), 166.0 (1-C), 163.5 (24-C), 163.2 (11-C), 131.7 (22-C), 131.5 (9-C), 122.9 (21-C), 122.3 (8-C), 113.7 (23-C), 113.6 (10-C), 82.8 (5-C), 76.3 (20-C), 66.7 (6-C), 62.5 (2-C), 60.9 (4-C), 55.4 (25-C), 55.3 (12-C), 52.3 (13-C), 38.6, 34.0, 31.5, 28.2, 28.0, 22.1, 19.6 (3-C and 17-C to 22-C); **LCMS**  $m/z$  (EI) 510 ( $[\text{M}+\text{H}]^+$  100), 358 (17); **HRMS** Found 510.2474  $\text{C}_{29}\text{H}_{36}\text{NO}_7$ ,  $[\text{M} + \text{H}]^+$ , Requires 510.2486.



[(3*aS*,4*S*,7*S*,10*aS*)-7-{2-[(4-fluorobenzoyl)oxy]ethyl}octahydro-1*H*-cyclopenta[3,4][1,2]oxazolo[2,3-*a*]pyridin-4-yl]methyl 4-fluorobenzoate (**17c**)

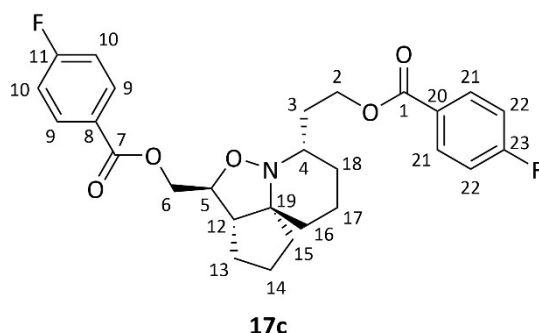

**15** (1 eq) was treated with 4-fluorobenzoyl chloride (1.1 eq) to give **17c** as a white residue, 0.022 g, 9.4 %. **IR**  $\nu_{\text{max}}$  (thin film)/ $\text{cm}^{-1}$ , 2937, 2867, 1716, 1602, 1507, 1270, 1238, 1152; **NMR**  $\delta_{\text{H}}$  (400 MHz,  $\text{CDCl}_3$ ) 8.07-8.00 (4H, m, 9-H, 21-H), 7.14-7.04 (4H, m, 10-H, 22-H), 4.54 (1H, dd,  $J$  11.6, 4.58,  $6_{\text{A}}$ -H), 4.47-4.43 (2H, m, 2- $\text{H}_2$ ), 4.36 (1H, dd,  $J$  11.5, 6.90,  $6_{\text{B}}$ -H), 3.99-3.98 (1H, m, 5-H), 2.93-2.92 (1H, m, 4-H), 2.50-2.47 (1H, m, 12-H), 2.26-2.23 (1H, m,  $18_{\text{B}}$ -H), 2.01-1.28 (13H, m, 3- $\text{H}_2$ , 13- $\text{H}_2$ , 14- $\text{H}_2$ , 15- $\text{H}_2$ , 16- $\text{H}_2$ , 17- $\text{H}_2$ ,  $18_{\text{A}}$ -H);  $\delta_{\text{C}}$  (75 MHz,  $\text{CDCl}_3$ ) 165.7 (1-C), 165.3 (7-C), 164.6 (23-C), 164.4 (11-C), 132.2 (9-C), 132.1 (21-C), 126.7 (20-C), 126.1 (8-C), 115.7 (22-C), 115.4 (10-C), 82.6 (5-C), 76.3 (19-C), 67.1 (6-C), 63.0 (2-C), 60.8 (4-C), 52.6 (12-C), 34.1, 31.9, 31.4, 29.4, 28.1, 22.7, 19.4 (3-C and 13-C to 18-C); **MS**  $m/z$  (EI) 486 ( $\text{M}^+$  100), 346 (17), 318 (58), **HRMS** Requires 486.2073  $\text{C}_{27}\text{H}_{30}\text{F}_2\text{NO}_5$ ,  $[\text{M} + \text{H}]^+$ , Found 486.2087.

[(3a*S*,4*S*,7*S*,10a*S*)-7-{2-[(cyclohexanecarbonyl)oxy]ethyl}octahydro-1*H*-cyclopenta[3,4][1,2]oxazolo[2,3-*a*]pyridin-4-yl]methyl cyclohexanecarboxylate (**17d**)

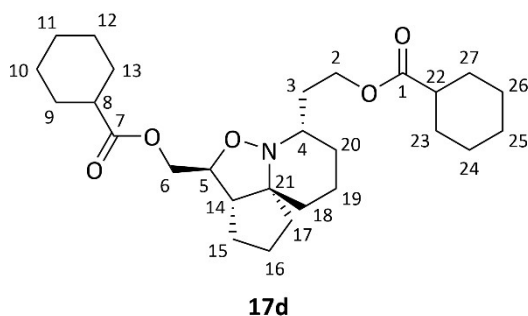

**15** (1 eq) was treated with cyclohexane carbonyl chloride (1.1 eq) to give **17d** as a colourless oil, 0.11 g, 50 %. No further purification was required. **IR**  $\nu_{\text{max}}$  (thin film)/ $\text{cm}^{-1}$ , 2929, 2854, 1728, 1450, 1225, 1168; **NMR**  $\delta_{\text{H}}$  (400 MHz,  $\text{CDCl}_3$ ) 4.26-4.21 (1H, dd,  $J$  4.97, 6<sub>B</sub>-H), 4.17-4.11 (3H, m, 2-H, 6<sub>A</sub>-H), 3.83-3.78 (1H, m, 5-H), 2.79-2.73 (1H, m, 4-H), 2.40-2.37 (1H, m, 14-H), 2.35-2.22 (2H, m, 8-H, 22-H), 2.11-2.04 (1H, m, 20<sub>A</sub>-H), 1.98-1.19 (33H, m, 3-H<sub>2</sub>, 9-H<sub>2</sub>, 10-H<sub>2</sub>, 11-H<sub>2</sub>, 12-H<sub>2</sub>, 13-H<sub>2</sub>, 15-H<sub>2</sub>, 16-H<sub>2</sub>, 17-H<sub>2</sub>, 18-H<sub>2</sub>, 19-H<sub>2</sub>, 20<sub>B</sub>-H, 23-H<sub>2</sub>, 24-H<sub>2</sub>, 25-H<sub>2</sub>, 26-H<sub>2</sub>, 27-H<sub>2</sub>);  $\delta_{\text{C}}$  (75 MHz,  $\text{CDCl}_3$ ) 176.1 (1-C), 175.8 (7-C), 82.7 (5-C), 76.3 (21-C), 66.4 (6-C), 61.9 (2-C), 60.8 (4-C), 52.3 (14-C), 43.2 (22-C), 43.1 (8-C), 38.5, 34.5, 33.9, 31.5, 29.1, 29.0, 29.0, 28.2, 28.1, 27.7, 25.8, 25.7, 25.5, 25.4, 25.4, 22.1, 19.6 (3-C, 9-C to 13-C, 15-C to 20-C and 23-C to 27-C); **LCMS**  $m/z$  (EI) 462 [ $\text{M} + \text{H}$ ]<sup>+</sup> 100), 334 (100); **HRMS** Found 462.3209  $\text{C}_{27}\text{H}_{44}\text{NO}_5$ , [ $\text{M} + \text{H}$ ]<sup>+</sup>, Requires 462.3214.

[(3*aS*,4*S*,7*S*,10*aS*)-7-(2-chloroethyl)octahydro-1*H*-cyclopenta[3,4][1,2]oxazolo[2,3-*a*]pyridin-4-yl]methyl 4-nitrobenzene-1-sulfonate (**17e**)

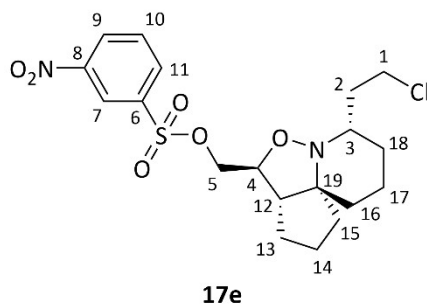

**15** (1 eq) was treated with 3-nitrobenzene sulfonyl chloride (3.3 eq) to give **17e** as a brown oil, 0.025 g, 12 %. IR  $\nu_{\text{max}}$  (thin film)/ $\text{cm}^{-1}$ ) 2936, 2872, 1607, 1532, 1447, 1372, 1351, 1189, 733; NMR  $\delta_{\text{H}}$  (400 MHz,  $\text{CDCl}_3$ ) 8.77-8.74 (1H, m, 7-H), 8.53-8.50 (1H, m, 9-H), 8.27-8.25 (1H, m, 11-H), 7.81 (1H, t,  $J$  8.05, 10-H), 4.34 (1H, ddd,  $J$  4.64, 5<sub>A</sub>-H), 4.25 (1H, ddd,  $J$  6.28, 5<sub>B</sub>-H), 3.86-3.82 (1H, m, 4-H), 3.66-3.48 (2H, m, 1-H<sub>2</sub>), 2.72-2.65 (1H, m, 3-H), 2.43-2.40 (1H, m, 12-H), 2.15-2.06 (1H, m, 18<sub>A</sub>-H), 1.93-1.32 (13H, m, 2-H<sub>2</sub>, 13-H<sub>2</sub>, 14-H<sub>2</sub>, 15-H<sub>2</sub>, 16-H<sub>2</sub>, 17-H<sub>2</sub>, 18<sub>B</sub>-H);  $\delta_{\text{C}}$  (75 MHz,  $\text{CDCl}_3$ ) 148.3 (8-C), 138.2 (6-C), 133.4 (11-C), 130.8 (10-C), 128.4 (9-C), 123.2 (7-C), 81.9 (4-C), 76.5 (19-C), 72.5 (5-C), 60.7 (3-C), 51.9 (12-C), 42.5 (1-C), 38.3 (2-C), 38.0 (18-C), 31.2, 29.7, 27.8, 22.0, 19.3 (13-C to 17-C); MS  $m/z$  (EI) 445 ( $[\text{M} + \text{H}]^+$  100), 242 (18), HRMS Found 445.1195  $\text{C}_{19}\text{H}_{25}\text{ClN}_2\text{O}_6\text{S}$ ,  $[\text{M} + \text{H}]^+$ , Requires 445.1200.

[(3*aS*,4*S*,7*S*,10*aS*)-7-(2-chloroethyl)octahydro-1*H*-cyclopenta[3,4][1,2]oxazolo[2,3-*a*]pyridin-4-yl]methyl 4-nitrobenzene-1-sulfonate (**17f**)

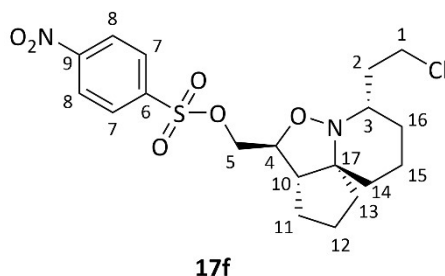

**15** (1 eq) was treated with 4-nitrobenzene sulfonyl chloride (2.2 eq) to give **17f** as a white residue, 0.046 g, 26 %. **IR**  $\nu_{\max}$  (thin film)/ $\text{cm}^{-1}$ ) 2938, 2871, 1604, 1532, 1446, 1403, 1370, 1185, 640; **NMR**  $\delta_{\text{H}}$  (400 MHz,  $\text{CDCl}_3$ ) 8.42-8.39 (2H, m, 8-H), 8.14-8.11 (2H, m, 7-H), 4.28 (2H, ddd,  $J$  6.34, 5- $\text{H}_2$ ), 3.85-3.81 (1H, m, 4-H), 3.64-3.49 (2H, m, 1- $\text{H}_2$ ), 2.72-2.65 (1H, m, 3-H), 2.41-2.38 (1H, m, 10-H), 2.15-2.06 (1H, m, 2-H), 1.92-1.19 (13H, m, 2-H, 11- $\text{H}_2$ , 12- $\text{H}_2$ , 13- $\text{H}_2$ , 14- $\text{H}_2$ , 15- $\text{H}_2$ , 16- $\text{H}_2$ );  $\delta_{\text{C}}$  (75 MHz,  $\text{CDCl}_3$ ) 150.8 (9-C), 141.7 (6-C), 129.3 (7-C), 124.5 (8-C), 81.9 (4-C), 76.5 (17-C), 72.6 (5-C), 60.7 (3-C), 51.8 (10-C), 42.5 (1-C), 38.3, 38.0, 31.2, 27.8, 27.7, 21.9, 19.3 (2-C and 11-C to 16-C); **HRMS** (TOF MS) 445 ( $[\text{M} + \text{H}]^+$  100).

2-[(3*aS*,4*S*,7*S*,10*aS*)-4-(hydroxymethyl)octahydro-1*H*-cyclopenta[3,4][1,2]oxazolo[2,3-*a*]pyridin-7-yl]ethyl thiophene-2-sulfonate (**17ga**)

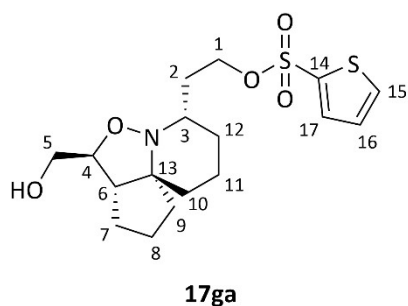

**15** (1 eq) was treated with 2-thiophenesulfonyl chloride (2.2 eq) to give **17ga** as a colourless oil, 0.048 g, 22 %. **IR**  $\nu_{\text{max}}$  (thin film)/ $\text{cm}^{-1}$ ) 3383-OH, 2936, 2871, 1403, 1445, 1368, 1227, 1177; **NMR**  $\delta_{\text{H}}$  (400 MHz,  $\text{CDCl}_3$ ) 7.74-7.73 (1H, m, 15-H), 7.71-7.70 (1H, m, 17-H), 7.15-7.14 (1H, m, 16-H), 4.24-4.23 (2H, m, 1-H<sub>2</sub>), 3.84-3.75 (2H, m, 4-H, 5<sub>B</sub>-H), 3.66-3.62 (1H, m, 5<sub>A</sub>-H), 2.94-2.90 (1H, m, 3-H), 2.42-2.38 (1H, m, 6-H), 1.97-1.45 (2-H<sub>2</sub>, 7-H<sub>2</sub>, 8-H<sub>2</sub>, 9-H<sub>2</sub>, 10-H<sub>2</sub>, 11-H<sub>2</sub>, 12-H<sub>2</sub>);  $\delta_{\text{C}}$  (75 MHz,  $\text{CDCl}_3$ ) 135.6 (14-C), 134.5 (15-C), 133.1 (17-C), 128.2 (16-C), 80.8 (4-C), 76.3 (13-C), 71.1 (1-C), 60.9 (3-C), 60.4 (5-C), 52.6 (6-C), 37.9, 35.5, 34.7, 30.9, 27.3, 23.7, 18.9 (2-C and 7-C to 12-C); **MS** (EI) 388 ( $[\text{M} + \text{H}]^+$  100), 370 (60), **HRMS** Found 388.1240,  $\text{C}_{17}\text{H}_{26}\text{NO}_5\text{S}_2$   $[\text{M} + \text{H}]^+$ , Requires 388.1247.

[7-(2-chloroethyl)octahydro-1H-cyclopenta[3,4][1,2]oxazolo[2,3-a]pyridin-4-yl]methyl thiophene-2-sulfonate (**17gb**)

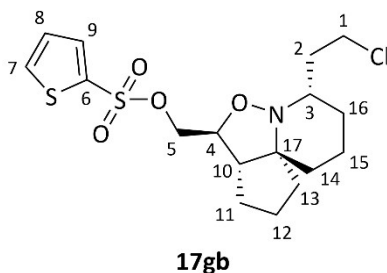

**15** (1 eq) was treated with 2-thiophenesulfonyl chloride (2.2 eq) to give **17gb** as a colourless oil, 0.051 g, 24 %. **IR**  $\nu_{\text{max}}$  (thin film)/ $\text{cm}^{-1}$ ) 2938, 2870, 1445, 1368, 1228, 1177, 727; **NMR**  $\delta_{\text{H}}$  (400 MHz,  $\text{CDCl}_3$ ) 7.73 (1H, dd,  $J$  3.79, 1.36, 7-H), 7.72 (1H, dd,  $J$  5.02, 1.35, 9-H), 7.16, (1H, dd,  $J$  5.01, 3.80, 8-H), 4.28-4.21 (2H, m, 5- $\text{H}_2$ ), 3.84-3.80 (1H, M, 4-H), 3.65-3.65-3.52 (2H, m, 1- $\text{H}_2$ ), 2.71-2.65 (1H, m, 3-H), 2.44-2.41 (1H, m, 10-H), 2.19-2.11 (1H, m, 16<sub>A</sub>-H), 1.95-1.36 (13H, m, 2- $\text{H}_2$ , 11- $\text{H}_2$ , 12- $\text{H}_2$ , 13- $\text{H}_2$ , 14- $\text{H}_2$ , 15- $\text{H}_2$ , 16<sub>B</sub>-H);  $\delta_{\text{C}}$  (75 MHz,  $\text{CDCl}_3$ ) 135.4 (6-C), 134.5 (9-C), 133.9 (7-C), 127.6 (8-C), 82.0 (4-C), 76.6 (17-C), 72.0 (5-C), 61.1 (3-C), 51.5 (10-C), 42.5 (1-C), 38.3, 38.2, 31.4, 28.3, 27.8, 21.7, 19.5 (2-C and 11-C to 16-C); **MS** (EI) 428 ( $[\text{M} + \text{Na}]^+$  100), 406 ( $[\text{M} + \text{H}]^+$  85), 370 (43); **HRMS** Found 406.0904  $\text{C}_{17}\text{H}_{25}\text{ClNO}_4\text{S}_2$ ,  $[\text{M} + \text{H}]^+$ , Requires 406.0908.

[(3*aS*,4*S*,7*S*,10*aS*)-7-{2-[(2*H*-1,3-benzodioxole-5-carbonyl)oxy]ethyl}octahydro-1*H*-cyclopenta[3,4][1,2]oxazolo[2,3-*a*]pyridin-4-yl]methyl 2*H*-1,3-benzodioxole-5-carboxylate  
**(17h)**

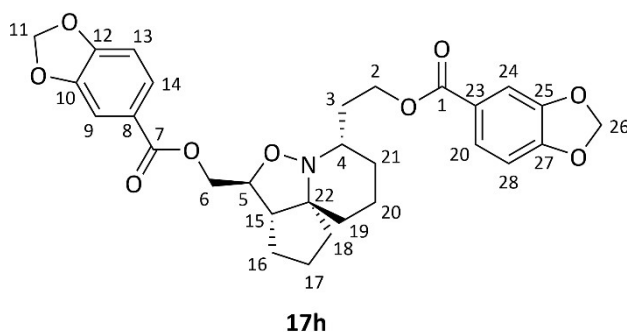

**15** (1 eq) was treated with piperonyl chloride (1.8 eq) to give **17h** as an opaque oil, 0.071 g, 29%. **IR**  $\nu_{\max}$  (thin film)/ $\text{cm}^{-1}$ ) 2929, 2250, 1709, 1505, 1442, 1277; **NMR**  $\delta_{\text{H}}$  (400 MHz,  $\text{CDCl}_3$ ) 7.63 (1H, dd,  $J$  14.8, 1.64, 14-H), 7.60 (1H, dd,  $J$  14.8, 1.62, 29-H), 7.43 (1H, d,  $J$  15.74, 1.74, 13-H), 7.41 (1H, dd,  $J$  15.74, 1.74, 28-H), 6.81-6.77 (2H, m, 9-H, 24-H), 6.01 (2H, s, 11-H), 5.99 (2H, s, 26-H), 4.48 (1H, dd,  $J$  11.6, 4.63, 6<sub>B</sub>-H), 4.41-4.38 (2H, m, 2-H<sub>2</sub>), 4.32 (1H, dd,  $J$  11.6, 6.67, 6<sub>A</sub>-H), 3.97-3.92 (1H, m, 5-H), 2.92-2.88 (1H, m, 4-H), 2.49-2.46 (1H, m, 15-H), 2.25-2.20 (1H, m, 3-H), 2.01-1.50 (13H, m, 3-H, 16-H<sub>2</sub>, 17-H<sub>2</sub>, 18-H<sub>2</sub>, 19-H<sub>2</sub>, 20-H<sub>2</sub>, 21-H<sub>2</sub>);  $\delta_{\text{C}}$  (75 MHz,  $\text{CDCl}_3$ ) 165.9 (1-C), 165.6 (7-C), 151.7 (12-C), 151.4 (27-C), 147.7 (10-C), 147.6 (25-C), 125.5 (14-C), 125.2 (29-C), 124.5 (8-C), 123.9 (23-C), 109.5 (13-C), 109.4 (28-C), 108.0 (9-C), 107.9 (24-C), 101.8 (11-C), 101.7 (26-C), 82.7 (5-C), 76.3 (22-C), 66.8 (6-C), 62.7 (2-C), 60.8 (4-C), 52.4 (15-C), 38.6, 34.1, 31.5, 29.8, 28.1, 22.2, 19.5 (3-C and 16-C to 21-C); **MS**  $m/z$  (FT) 538 ( $[\text{M}+\text{H}]^+$  100), 372 (13), **HRMS** Found 538.2065,  $\text{C}_{29}\text{H}_{31}\text{O}_9\text{N}$  ( $\text{M}+\text{H}^+$ ), requires 538.2072.

[(3*aS*,4*S*,7*S*,10*aS*)-7-{2-[(4-methylbenzoyl)oxy]ethyl}octahydro-1*H*-cyclopenta[3,4][1,2]oxazolo[2,3-*a*]pyridin-4-yl]methyl 4-methylbenzoate (**17i**)

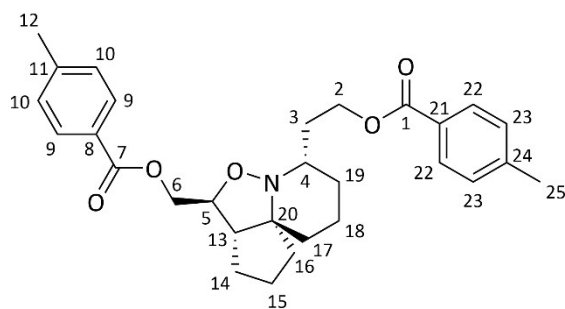

**17i**

**15** (1 eq) was treated with *p*-toluoyl chloride (4 eq) to give **17i** as a brown oil, 0.076 g, 38 %. **IR**  $\nu_{\max}$  (thin film)/ $\text{cm}^{-1}$ ) 2937, 1713, 1611, 1447, 1271, 1209, 1177; **NMR**  $\delta_{\text{H}}$  (400 MHz,  $\text{CDCl}_3$ ) 7.91 (4H, dd,  $J$  15.1, 8.21, 9-H, 22-H), 7.20 (4H, dd,  $J$  13.5, 8.21, 10-H, 23-H), 4.52 (1H, dd,  $J$  11.6, 4.79, 6<sub>B</sub>-H), 4.48-4.36 (3H, m, 2-H<sub>2</sub>, 6<sub>A</sub>-H), 4.01-3.96 (1H, m, 5-H), 2.94-2.90 (1H, m, 4-H), 2.53-2.50 (1H, m, 13-H), 2.39 (3H, s, 12-H<sub>3</sub>), 2.37 (3H, s, 25-H<sub>3</sub>), 2.32-2.24 (1H, m, 3<sub>B</sub>-H), 2.03-1.33 (13H, m, 3<sub>A</sub>-H, 14-H<sub>2</sub>, 15-H<sub>2</sub>, 16-H<sub>2</sub>, 17-H<sub>2</sub>, 18-H<sub>2</sub>, 19-H<sub>2</sub>);  $\delta_{\text{C}}$  (75 MHz,  $\text{CDCl}_3$ ) 166.7 (1-C), 166.2 (7-C), 143.8 (11-C), 143.3 (24-C), 129.7 (22-C), 129.5 (9-C), 129.1 (23-C), 129.0 (10-C), 127.7 (21-C), 127.1 (8-C), 82.7 (5-C), 76.3 (20-C), 66.7 (6-C), 62.6 (2-C), 60.9 (4-C), 52.3 (13-C), 38.5, 33.9, 31.5, 28.2, 28.0, 22.1, 21.7, 21.6, 19.5 (3-C, 12-C, 14-C to 19-C and 25-C); **MS** (EI) 500 ( $[\text{M}+\text{Na}]^+$  14), 478 (100), 342 (12), **HRMS** Requires 478.2581  $\text{C}_{29}\text{H}_{36}\text{NO}_5$ ,  $[\text{M}+\text{H}]^+$ , Found 478.2588.



[(3*aS*,4*S*,7*S*,10*aS*)-7-{2-[(pyridine-4-carbonyl)oxy]ethyl}octahydro-1*H*-cyclopenta[3,4][1,2]oxazolo[2,3-*a*]pyridin-4-yl]methyl pyridine-4-carboxylate (**17j**)

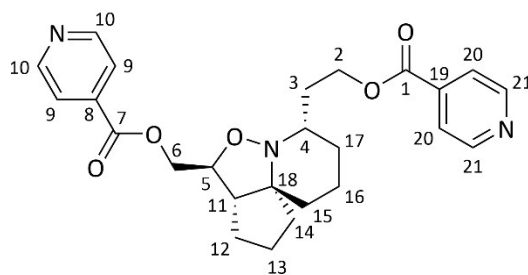

**17j**

**15** (1 eq) was treated with isonicotinoyl chloride (3 eq) to give **17j** as a yellow oil, 0.067 g, 36 %. No further purification was required. **IR**  $\nu_{\max}$  (thin film)/ $\text{cm}^{-1}$ ) 2931, 2361, 1727, 1597, 1446, 1124; **NMR**  $\delta_{\text{H}}$  (400 MHz,  $\text{CDCl}_3$ ) 8.76-8.71 (4H, m, 10-H, 21-H), 7.81-7.76 (4H, m, 9-H, 20-H), 4.54-4.46 (3H, m, 2- $\text{H}_2$ , 6 $_{\text{A}}$ -H), 4.37 (1H, dd,  $J$  11.6, 7.11, 6 $_{\text{B}}$ -H), 3.97-3.92 (1H, m, 5-H), 2.91-2.88 (1H, m, 4-H), 2.45-2.42 (1H, m, 11-H), 2.21-2.13 (1H, m, 3 $_{\text{B}}$ -H), 1.97-1.32 (13H, m, 3 $_{\text{A}}$ -H, 12- $\text{H}_2$ , 13- $\text{H}_2$ , 14- $\text{H}_2$ , 15- $\text{H}_2$ , 16- $\text{H}_2$ , 17- $\text{H}_2$ );  $\delta_{\text{C}}$  (75 MHz,  $\text{CDCl}_3$ ) 165.1 (1-C), 164.8 (7-C), 150.7 (21-C), 150.6 (10-C), 137.5 (19-C), 137.0 (8-C), 122.9 (9-C), 122.8 (20-C), 82.1 (5-C), 76.2 (18-C), 67.6 (6-C), 63.7 (2-C), 60.4 (3-C), 52.7 (11-C), 38.6, 34.2, 31.1, 28.1, 27.9, 22.4, 19.3 (3-C and 12-C to 17-C); **MS** (EI) 474 ( $[\text{M}+\text{Na}]^+$  12), 452 (100), 329 (15); **HRMS** Found 452.2172  $\text{C}_{25}\text{H}_{30}\text{N}_3\text{O}_5$ ,  $[\text{M}+\text{H}]^+$ , Requires 452.2180.

[(3*a*S,4*S*,7*S*,10*a*S)-7-(2-hydroxyethyl)octahydro-1*H*-cyclopenta[3,4][1,2]oxazolo[2,3-*a*]pyridin-4-yl]methyl naphthalene-1-carboxylate (**17ka**)

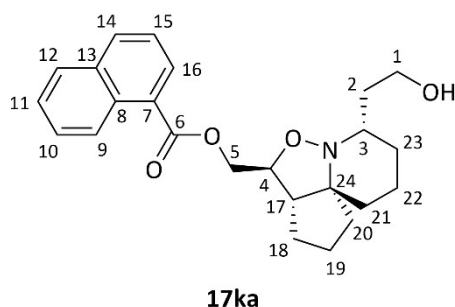

**15** (1 eq) was treated with 1-naphthoyl chloride (1.5 eq) to give **17ka** as a white residue, 0.023 g, 7.0 %. **IR**  $\nu_{\max}$  (thin film)/ $\text{cm}^{-1}$  3397-OH, 2936, 2867, 1714, 1593, 1510, 1445, 1245, 1196, 1134; **NMR**  $\delta_{\text{H}}$  (400 MHz,  $\text{CDCl}_3$ ) 8.93 (1H, d,  $J$  8.66, 9-H), 8.23 (1H, dd,  $J$  7.28, 1.19, 16-H), 8.04-8.02 (1H, m, 14-H), 7.90-7.88 (1H, m, 12-H), 7.65-7.60 (1H, m, 10-H), 7.56-7.49 (2H, m, 11-H, 15-H), 4.62-4.51 (2H, m, 5- $\text{H}_2$ ), 4.03-3.99 (1H, m, 4-H), 3.96-3.90 (1H, m, 1<sub>B</sub>-H), 3.75-3.70 (1H, m, 1<sub>A</sub>-H), 3.18-3.13 (1H, m, 3-H), 2.52-2.48 (1H, m, 17-H), 2.09-1.49 (14H, m, 2- $\text{H}_2$ , 18- $\text{H}_2$ , 19- $\text{H}_2$ , 20- $\text{H}_2$ , 21- $\text{H}_2$ , 22- $\text{H}_2$ , 23- $\text{H}_2$ );  $\delta_{\text{C}}$  (75 MHz,  $\text{CDCl}_3$ ) 167.3 (6-C), 133.8 (13-C), 133.6 (14-C), 131.4 (7-C), 130.5 (16-C), 128.6 (12-C), 127.9 (10-C), 126.7 (8-C), 126.3 (11-C), 125.8 (9-C), 124.5 (15-C), 81.9 (4-C), 76.0 (24-C), 66.2 (5-C), 61.3 (3-C), 60.5 (1-C), 54.0 (17-C), 38.7, 35.5, 30.7, 28.4, 26.2, 23.1, 18.8 (2-C and 18-C to 23-C); **MS** 418 ( $[\text{M}+\text{Na}]^+$  100), 396 (14); **HRMS** Found 396.2161  $\text{C}_{24}\text{H}_{30}\text{NO}_4$ ,  $[\text{M}+\text{H}]^+$ , Requires 396.2169.

[(3*aS*,4*S*,7*S*,10*aS*)-7-{2-[(naphthalene-1-carbonyl)oxy]ethyl}octahydro-1*H*-cyclopenta[3,4][1,2]oxazolo[2,3-*a*]pyridin-4-yl]methyl naphthalene-1-carboxylate (**17kb**)

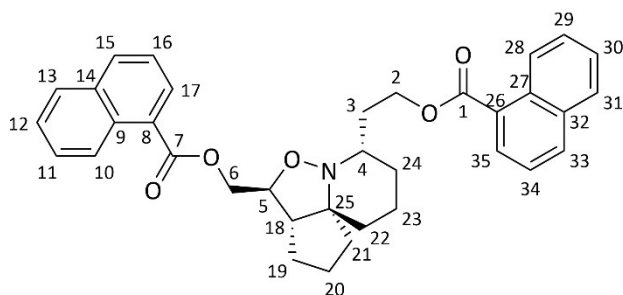

**17kb**

**15** (1 eq) was treated with 1-naphthoyl chloride (1.5 eq) to give **17kb** as a white residue, 0.14 g, 32 %. **IR**  $\nu_{\max}$  (thin film)/ $\text{cm}^{-1}$ ) 2924, 2855, 1711, 1593, 1510, 1455, 1241, 1195, 1133; **NMR**  $\delta_{\text{H}}$  (400 MHz,  $\text{CDCl}_3$ ) 8.91 (2H, t,  $J$  9.30, 10-H, 28-H), 8.22 (1H, dd,  $J$  7.28, 17-H), 8.15 (1H, dd,  $J$  7.26, 33-H), 8.00 (1H, d,  $J$  8.20, 15-H), 7.94 (1H, d,  $J$  8.20, 35-H), 7.87-7.82 (2H, m, 13-H, 31-H), 7.61-7.41 (6H, m, 11-H, 12-H, 16-H, 29-H, 30-H, 34-H), 4.62 (1H, m, 6<sub>B</sub>-H), 4.58 (2H, t,  $J$  6.81, 2-H<sub>2</sub>), 4.50 (1H, dd,  $J$  6.85, 6<sub>A</sub>-H), 4.09-4.04 (1H, m, 5-H), 3.05-3.00 (1H, m, 4-H), 2.57-2.53 (1H, m, 18-H), 2.40-2.33 (1H, m, 3<sub>B</sub>-H), 2.08-1.38 (13H, m, 3<sub>A</sub>-H, 19-H<sub>2</sub>, 20-H<sub>2</sub>, 21-H<sub>2</sub>, 22-H<sub>2</sub>, 23-H<sub>2</sub>, 24-H<sub>2</sub>);  $\delta_{\text{C}}$  (75 MHz,  $\text{CDCl}_3$ ) 167.6 (1-C), 167.2 (7-C), 133.8 (14-C), 133.7 (32-C), 133.5 (15-C), 133.1 (35-C), 131.4 (8-C), 131.3 (26-C), 130.5 (17-C), 130.1 (33-C), 128.5 (13-C), 128.4 (31-C), 127.8 (11-C), 127.6 (29-C), 127.4 (9-C), 126.7 (27-C), 126.2 (12-C), 126.1 (30-C), 125.8 (10-C), 125.7 (28-C), 124.5 (16-C, 34-C), 82.5 (5-C), 76.3 (25-C), 67.0 (6-C), 62.9 (2-C), 60.7 (4-C), 52.7 (18-C), 38.6 (3-C), 34.2, 31.3, 28.2, 22.4, 28.0, 19.4 (19-C to 24-C); **MS** (EI) 572 ( $[\text{M}+\text{Na}]^+$  10), 550 (100), 378 (22); **HRMS** Found 550.2587  $\text{C}_{35}\text{H}_{36}\text{NO}_5$ ,  $[\text{M}+\text{H}]^+$ , Requires 550.2588.

[(3*aS*,4*S*,7*S*,10*aS*)-7-{2-[(isoquinoline-3-carbonyl)oxy]ethyl}octahydro-1*H*-cyclopenta[3,4][1,2]oxazolo[2,3-*a*]pyridin-4-yl]methyl isoquinoline-3-carboxylate (**18la**)

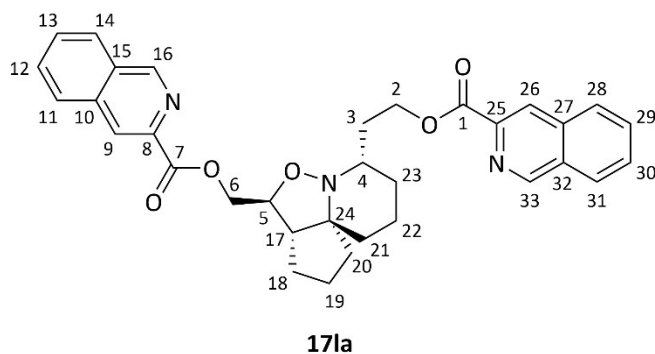

**15** (1 eq) was treated with quinaldoyl chloride (1.3 eq) to give **17la** as a yellow oil. The crude mixture was purified via flash chromatography, eluting with DCM/MeOH 9:1 to give a yellow oil, 0.13 g, 39 %. **IR**  $\nu_{\text{max}}$  (thin film)/ $\text{cm}^{-1}$ ) 2937, 2236, 1721, 1593, 1564, 1504, 1462, 1243, 1136, 1106; **NMR**  $\delta_{\text{H}}$  (400 MHz,  $\text{CDCl}_3$ ) 8.26-8.19 (4H, m, 9-H, 16-H, 26-H, 33-H), 8.12-8.08 (2H, m, 11-H, 28-H), 7.90-7.56 (6H, m, 13-H, 13-H, 14-H, 29-H, 30-H, 31-H), 4.70 (1H, dd,  $J$  7.47, 4.25, 6-H), 4.66-4.57 (3H, m, 2- $\text{H}_2$ , 6-H), 4.10-4.05 (1H, m, 5-H), 3.15-3.08 (1H, m, 4-H), 2.64-2.60 (1H, m, 17-H), 2.41-2.33 (1H, m, 3-H), 2.01-1.37 (13H, m, 3-H, 18- $\text{H}_2$ , 19- $\text{H}_2$ , 20- $\text{H}_2$ , 21- $\text{H}_2$ , 22- $\text{H}_2$ , 23- $\text{H}_2$ );  $\delta_{\text{C}}$  (75 MHz,  $\text{CDCl}_3$ ) 165.3 (7-C), 164.9 (1-C), 148.2 (8-C), 147.6 (25-C), 147.6 (15-C), 147.5 (32-C), 137.2, 137.1, 130.7, 130.2, 130.1, 129.3 (10-C), 129.2 (17-C), 128.6, 128.4, 127.5, 127.4, 121.1, 121.0, 82.7 (5-C), 76.4 (24-C), 67.4 (6-C), 64.1 (2-C), 60.7 (4-C), 51.9 (17-C), 38.5, 34.0, 31.6, 28.5, 27.9, 22.1, 19.6 (3-C and 18-C to 23-C); **MS** (EI) 552 ( $[\text{M}+\text{H}]^+$  100), 379 (85), 365 (17), 351 (36); **HRMS** Found 552.2481  $\text{C}_{33}\text{H}_{34}\text{N}_3\text{O}_5$ ,  $[\text{M}+\text{H}]^+$ , Requires 552.2493.

[7-(2-hydroxyethyl)octahydro-1H-cyclopenta[3,4][1,2]oxazolo[2,3-a]pyridin-4-yl]methyl isoquinoline-3-carboxylate and 2-[4-(hydroxymethyl)octahydro-1H-cyclopenta[3,4][1,2]oxazolo[2,3-a]pyridin-7-yl]ethyl isoquinoline-3-carboxylate (**17lb**) and (**17lc**)

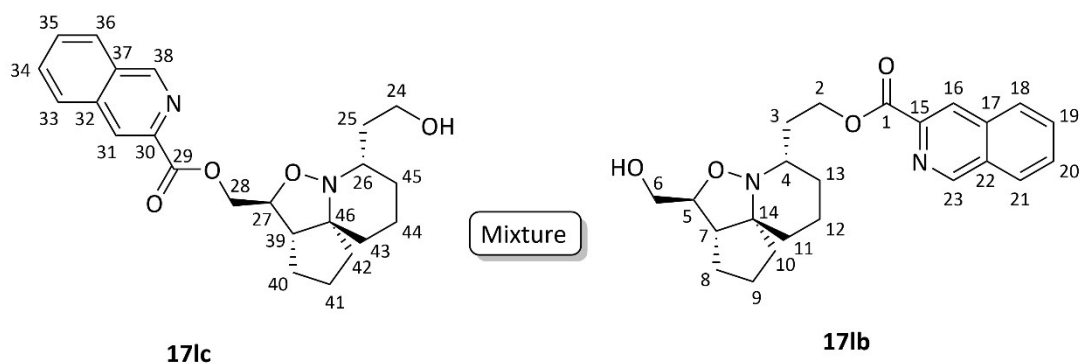

**15** was treated with quinaldoyl chloride (1.3 eq) to give a mixture of **17lb** and **17lc** as an opaque residue, 0.027 g, 11 %. IR  $\nu_{\max}$  (thin film)/ $\text{cm}^{-1}$ ) 3374, 2934, 2867, 1720, 1657, 1593, 1564, 1505, 1463, 1293, 1243, 1139, 1107; NMR  $\delta_{\text{H}}$  (400 MHz,  $\text{CDCl}_3$ ) 8.39-3.19 (6H, m, 16-H, 18-H, 23-H, 31-H, 33-H, 38-H), 7.90-7.64 (6H, m, 19-H, 30-H, 21-H, 34-H, 35-H, 36-H), 5.34 (1H, Br s, O-H), 4.79-4.74 (1H, m, 28-H), 4.65 (2H, d,  $J$  5.05, 2-H<sub>2</sub>), 4.59-4.53 (1H, m, 28-H), 4.09-4.05 (1H, m, 27-H), 3.99-3.90 (2H, m, 6-H, 24-H), 3.84-3.81 (1H, m, 5-H), 3.77-3.68 (2-H, m, 6-H, 24-H), 3.41-3.34 (1H, m, 4-H), 3.24-3.20 (1H, m, 26-H), 2.85-2.82 (1H, m, 39-H), 2.57-2.53 (1H, m, 7-H), 2.35-2.27 (1H, m, 3-H), 2.11-1.41 (27H, m, 3-H, 8-H<sub>2</sub>, 9-H<sub>2</sub>, 10-H<sub>2</sub>, 11-H<sub>2</sub>, 12-H<sub>2</sub>, 13-H<sub>2</sub>, 25-H<sub>2</sub>, 40-H<sub>2</sub>, 41-H<sub>2</sub>, 42-H<sub>2</sub>, 43-H<sub>2</sub>, 44-H<sub>2</sub>, 45-H<sub>2</sub>);  $\delta_{\text{C}}$  (75 MHz,  $\text{CDCl}_3$ ) 165.5 (29-C), 165.1 (1-C), 148.1 (30-C), 147.6 (15-C), 147.5 (37-C), 147.1 (22-C), 137.8, 137.4, 130.6, 130.4, 129.8, 129.5 (32-C), 129.4 (17-C), 128.7, 127.6, 121.2, 121.1, 87.5 (5-C), 82.3 (27-C), 77.0 (14-C), 76.2 (46-C), 66.8 (2-C), 64.1 (28-C), 61.4 (6-C), 61.3 (26-C), 60.4 (24-C), 59.9 (4-C), 52.5 (7-C), 46.2 (39-C), 38.6, 38.3, 36.0, 35.6, 32.1, 31.2, 30.5, 28.1, 27.2, 27.1, 22.5, 20.7, 20.0, 19.2 (3-C, 8-C to 13-C, 25-C and 40-C to 45-C); MS (EI) 419 ( $[\text{M}+\text{Na}]^+$  100), 397 (13), 224 (10), HRMS Found 397.2119  $\text{C}_{23}\text{H}_{29}\text{N}_2\text{O}_4$ ,  $[\text{M}+\text{H}]^+$ , Requires 397.2122.

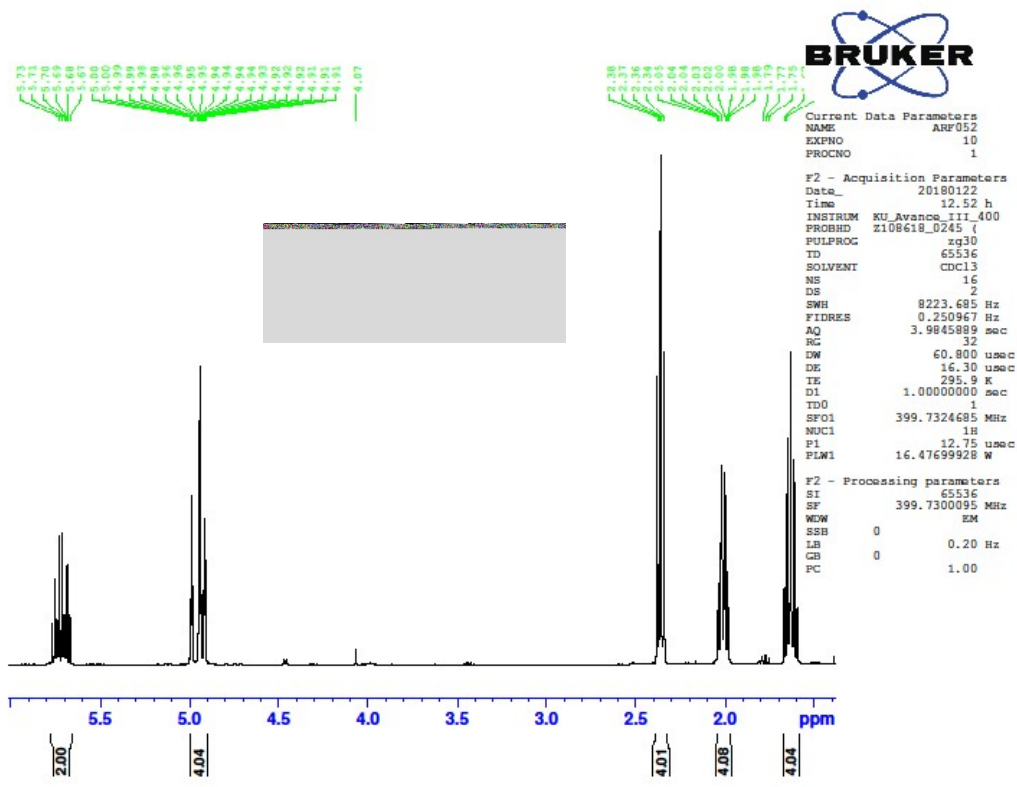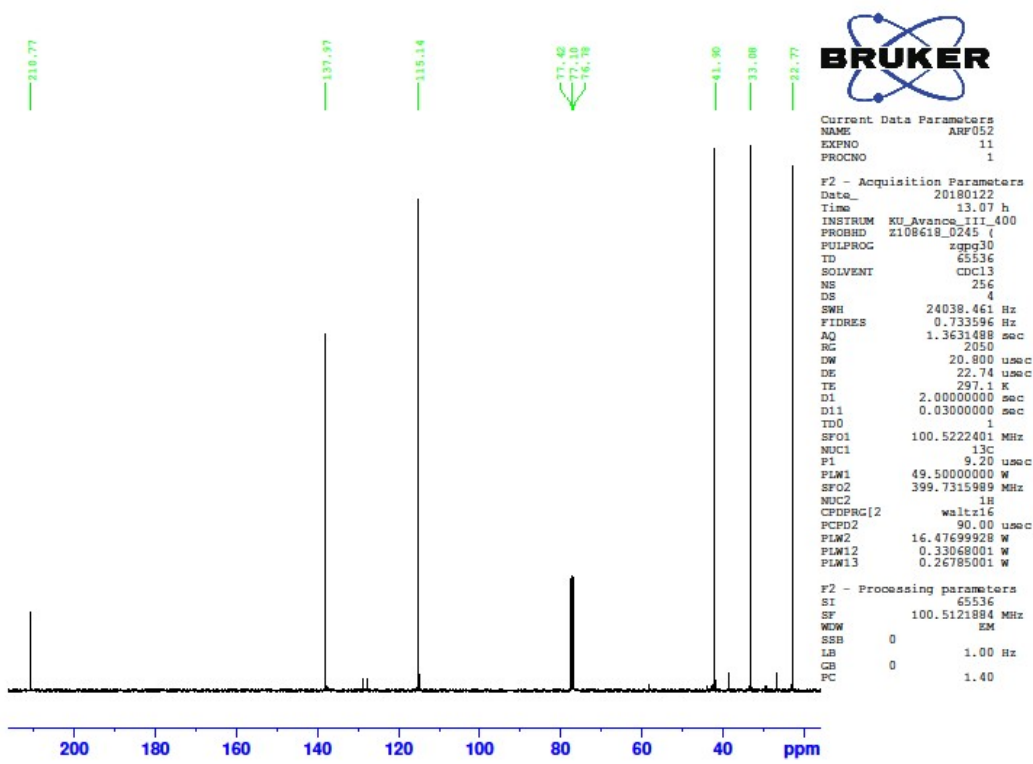



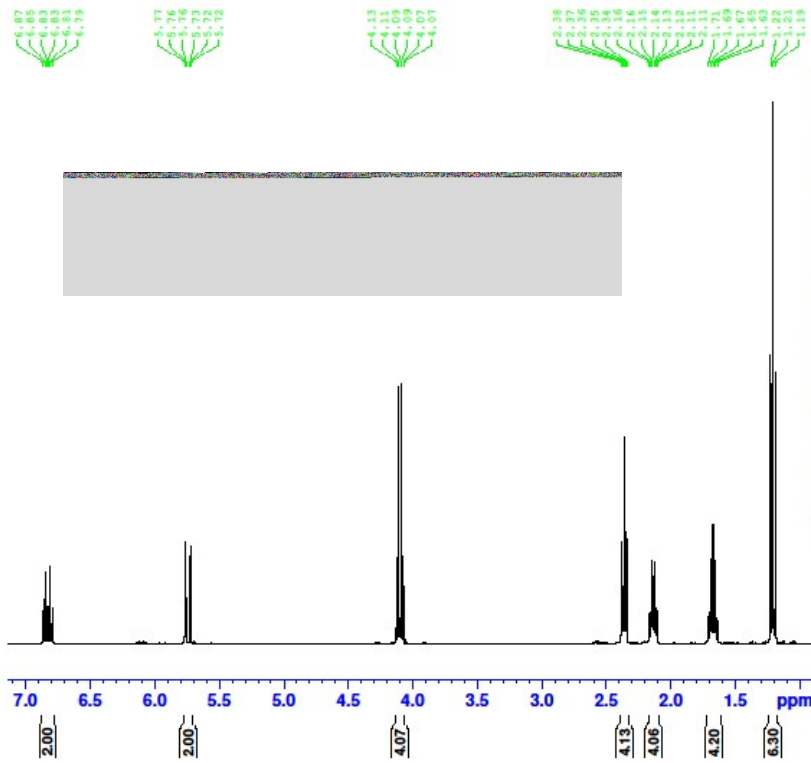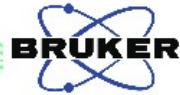

Current Data Parameters  
 NAME ARF053\_2  
 EXPNO 10  
 PROCNO 1

F2 - Acquisition Parameters  
 Date\_ 20180125  
 Time 13.51 h  
 INSTRUM KU\_Avance\_III\_400  
 PROBHD Z108618\_0245 ( )  
 PULPROG zg30  
 TD 65536  
 SOLVENT cdcl3  
 NS 16  
 DS 2  
 SWH 8223.685 Hz  
 FIDRES 0.250967 Hz  
 AQ 3.9845889 sec  
 RG 18  
 DW 60.800 usec  
 DE 16.30 usec  
 TE 296.1 K  
 D1 1.00000000 sec  
 TD0 1  
 SFO1 399.7324685 MHz  
 NUC1 1H  
 P1 12.75 usec  
 PLW1 16.47699928 W

F2 - Processing parameters  
 SI 65536  
 SF 399.7298924 MHz  
 WDW EM  
 SSB 0  
 LB 0.20 Hz  
 GB 0  
 PC 1.00

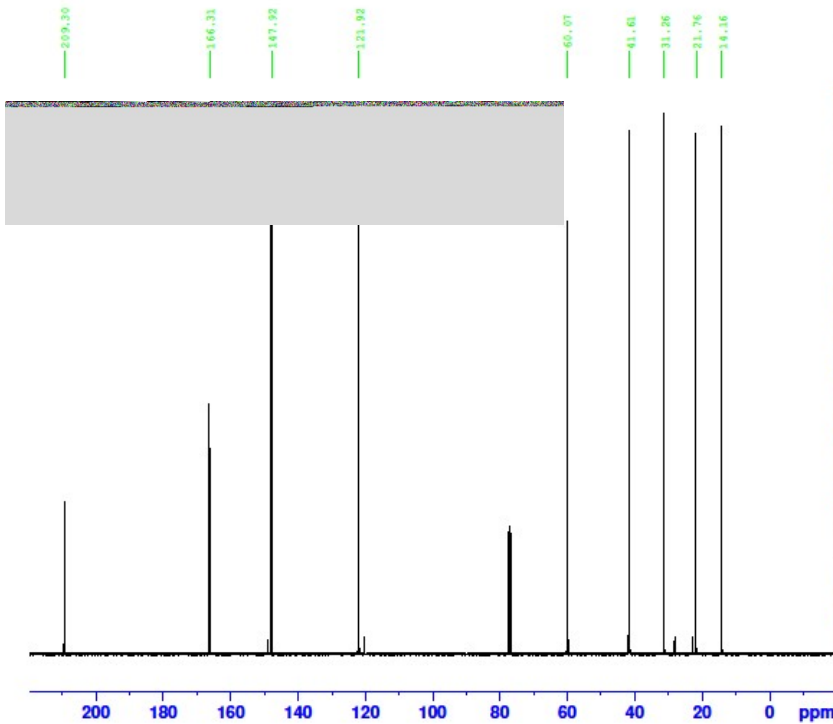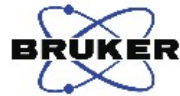

Current Data Parameters  
 NAME ARF053\_2  
 EXPNO 11  
 PROCNO 1

F2 - Acquisition Parameters  
 Date\_ 20180125  
 Time 14.06 h  
 INSTRUM KU\_Avance\_III\_400  
 PROBHD Z108618\_0245 ( )  
 PULPROG zgpg30  
 TD 65536  
 SOLVENT cdcl3  
 NS 256  
 DS 4  
 SWH 24038.461 Hz  
 FIDRES 0.733596 Hz  
 AQ 1.3631488 sec  
 RG 2050  
 DW 20.800 usec  
 DE 22.74 usec  
 TE 297.1 K  
 D1 2.00000000 sec  
 D11 0.03000000 sec  
 TD0 1  
 SFO1 100.5222401 MHz  
 NUC1 13C  
 P1 9.20 usec  
 PLW1 49.50000000 W  
 SFO2 399.7315989 MHz  
 NUC2 1H  
 CPDPRG[2] waltz16  
 PCPD2 90.00 usec  
 PLW2 16.47699928 W  
 PLW12 0.33068001 W  
 PLW13 0.26785001 W

F2 - Processing parameters  
 SI 65536  
 SF 100.5121884 MHz  
 WDW EM  
 SSB 0  
 LB 1.00 Hz  
 GB 0  
 PC 1.40





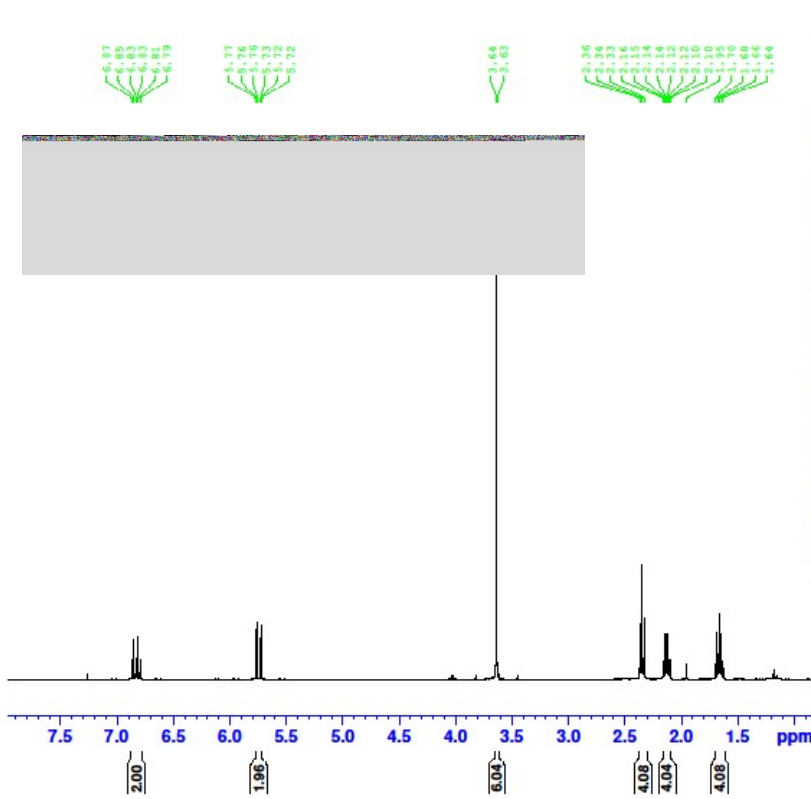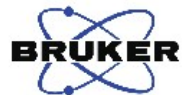

Current Data Parameters  
 NAME ARF152B  
 EXPNO 10  
 PROCNO 1

F2 - Acquisition Parameters  
 Date\_ 20190202  
 Time 15.22 h  
 INSTRUM KU\_Avance III\_400  
 PROBHD Z108618\_0245 ( )  
 PULPROG zg30  
 TD 65536  
 SOLVENT cdcl3  
 NS 16  
 DS 2  
 SWH 8223.685 Hz  
 FIDRES 0.250967 Hz  
 AQ 3.9845889 sec  
 RG 36  
 DW 60.800 usec  
 DE 16.30 usec  
 TE 295.1 K  
 D1 1.00000000 sec  
 TD0 1  
 SFO1 399.7324685 MHz  
 NUC1 1H  
 P1 12.75 usec  
 PLM1 16.47699928 W

F2 - Processing parameters  
 SI 65536  
 SF 399.7300092 MHz  
 WDW EM  
 SSB 0  
 LB 0.20 Hz  
 GB 0  
 PC 1.00

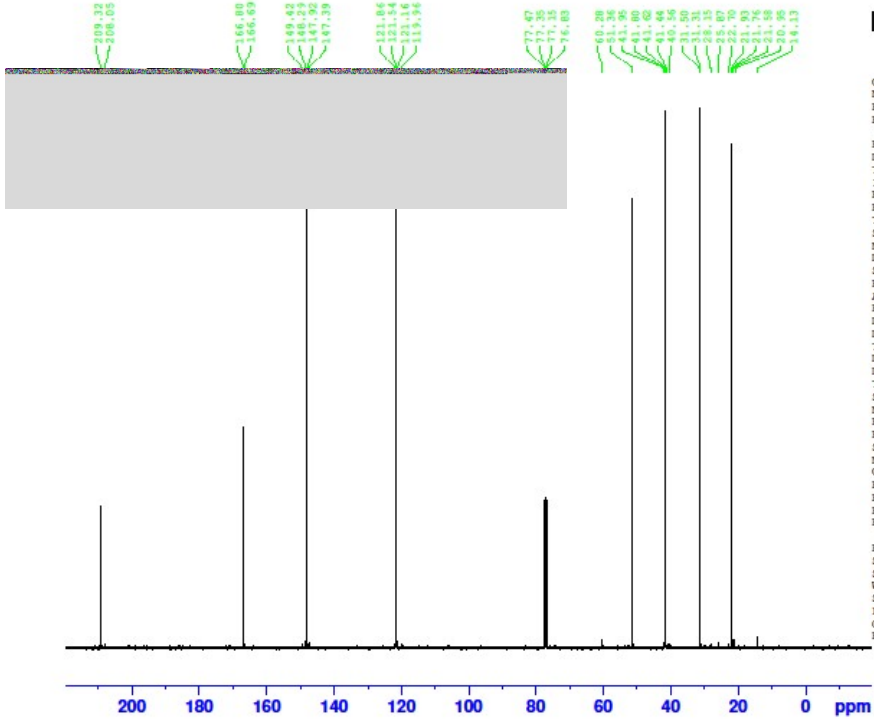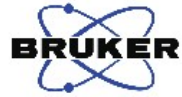

```

Current Data Parameters
NAME      ARF152B
EXPNO    11
PROCNO   1

F2 - Acquisition Parameters
Date_    20190203
Time     5.47 h
INSTRUM  KU_Avance III_400
PROBHD   Z108618_0245 (
PULPROG  zgpg30
TD        65536
SOLVENT  cdcl3
NS        256
DS        4
SWH       24038.461 Hz
FIDRES    0.733596 Hz
AQ        1.3631488 sec
RG        2050
DW        20.800 usec
DE        22.74 usec
TE        295.9 K
D1        2.00000000 sec
D11       0.03000000 sec
TD0       1
SFO1      100.5222401 MHz
NUC1      13C
P1        9.20 usec
PLM1      49.50000000 W
SFO2      399.7315989 MHz
NUC2      1H
CDEPRG[2] waltz16
PCPD2     90.00 usec
PLM2      16.47699928 W
PLM3      0.33068001 W
PLM13     0.26785001 W

F2 - Processing parameters
SI        65536
SF        100.5121884 MHz
WFW       RM
SSB       0
LB        1.00 Hz
GB        0
PC        1.40
  
```

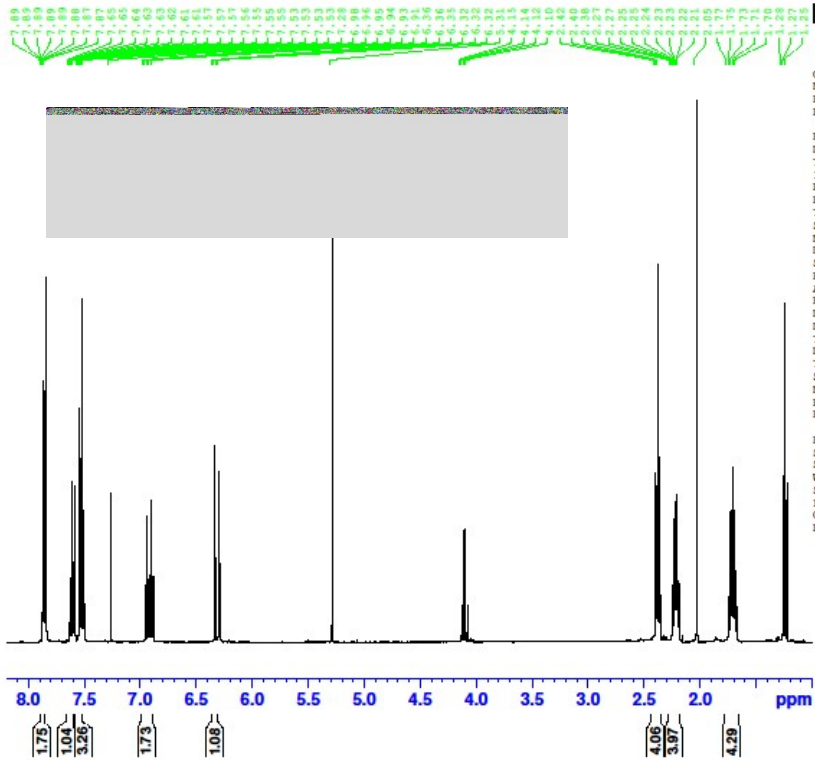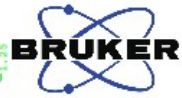

```

Current Data Parameters
NAME      ARF185
EXPNO    10
PROCNO   1

F2 - Acquisition Parameters
Date_    20190417
Time     19.12 h
INSTRUM  KU_Avance III_400
PROBHD   Z108618_0245 (
PULPROG  zg30
TD        65536
SOLVENT  CDCl3
NS        16
DS        2
SWH       8223.685 Hz
FIDRES    0.250967 Hz
AQ        3.9845889 sec
RG        144
DW        60.800 usec
DE        16.30 usec
TE        294.9 K
D1        1.00000000 sec
TD0       1
SFO1      399.7324685 MHz
NUC1      1H
P1        12.75 usec
PLM1      16.47699928 W

F2 - Processing parameters
SI        65536
SF        399.7300097 MHz
WFW       RM
SSB       0
LB        0.20 Hz
GB        0
PC        1.00
  
```

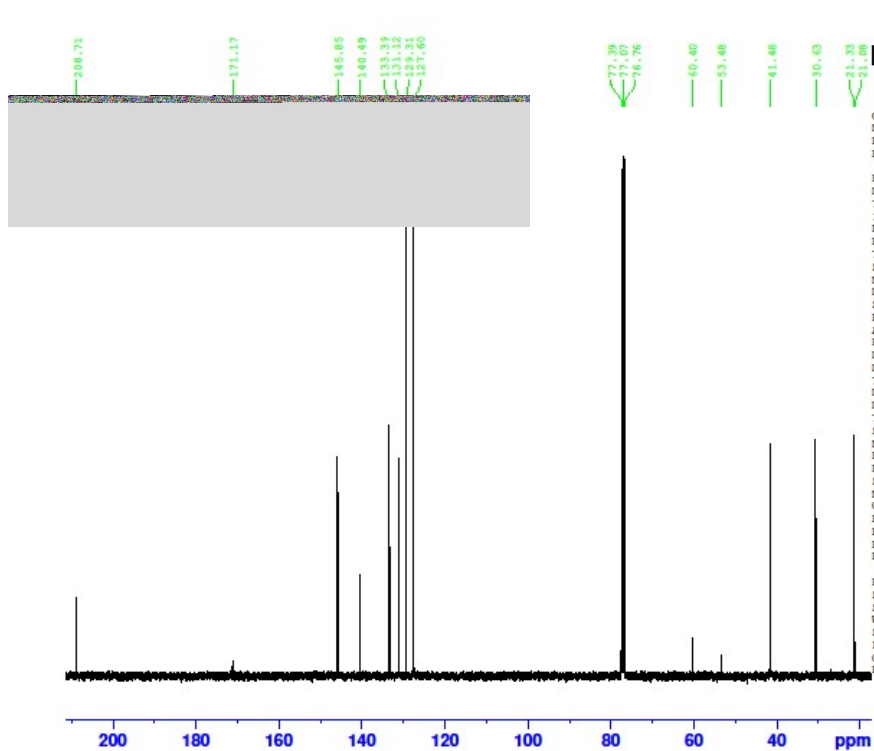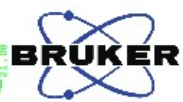

```

Current Data Parameters
NAME      ARF195
EXPNO    11
PROCNO   1

F2 - Acquisition Parameters
Date_    20190417
Time     19.28 h
INSTRUM  KU_Avance III_400
PROBHD   Z108618_0245 (
PULPROG  zgpg30
TD        65536
SOLVENT  cdcl3
NS        256
DS        4
SWH       24038.461 Hz
FIDRES    0.733596 Hz
AQ        1.3631488 sec
RG        2050
DW        20.800 usec
DE        22.74 usec
TE        295.9 K
D1        2.00000000 sec
D11       0.03000000 sec
TD0       1
SFO1      100.5222401 MHz
NUC1      13C
P1        9.20 usec
PLM1      49.50000000 W
SFO2      399.7315989 MHz
NUC2      1H
CDEPRG[2] waltz16
PCPD2     90.00 usec
PLM2      16.47699928 W
PLM12     0.33068001 W
PLM13     0.26785001 W

F2 - Processing parameters
SI        65536
SF        100.5121884 MHz
WEW       RM
SSB       0
LB        1.00 Hz
GB        0
PC        1.40
  
```

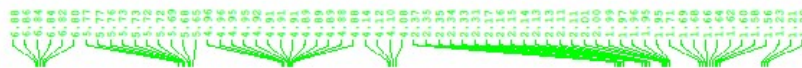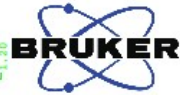

Current Data Parameters  
 NAME ARF089A  
 EXPNO 10  
 PROCNO 1

F2 - Acquisition Parameters  
 Date\_ 20180602  
 Time 16.57 h  
 INSTRUM KU\_Avance\_1H\_400  
 PROBHD Z108618\_0245 ( )  
 PULPROG zg30  
 TD 65536  
 SOLVENT cdcl3  
 NS 16  
 DS 2  
 SWH 8223.685 Hz  
 FIDRES 0.250967 Hz  
 AQ 3.9845889 sec  
 RG 45.2  
 DW 60.800 usec  
 DE 16.30 usec  
 TE 295.9 K  
 D1 1.00000000 sec  
 TD0 1  
 SFO1 399.7324685 MHz  
 NUC1 1H  
 P1 12.75 usec  
 PLW1 16.47699928 W

F2 - Processing parameters  
 SI 65536  
 SF 399.7300207 MHz  
 WDW EM  
 SSB 0  
 LB 0.20 Hz  
 GB 0  
 PC 1.00

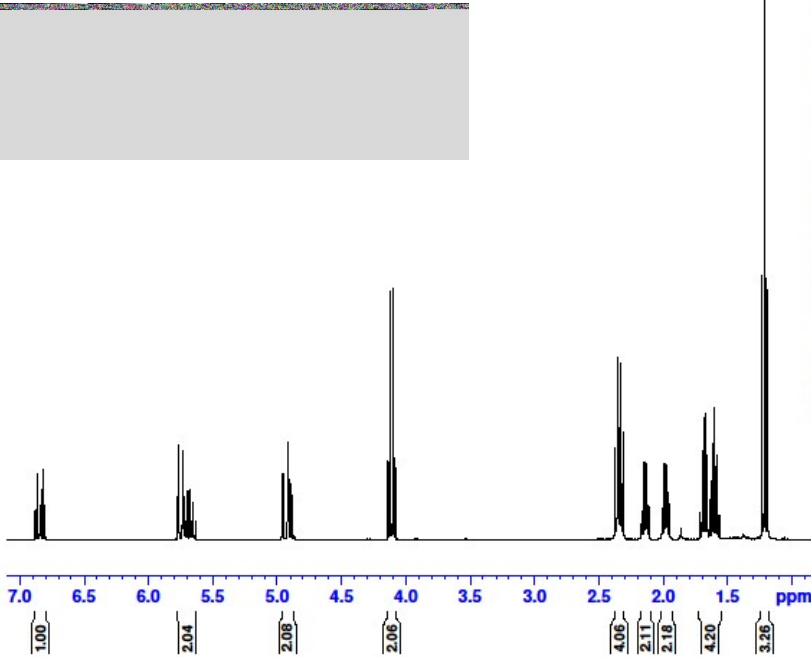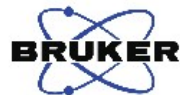

Current Data Parameters  
 NAME ARF089A  
 EXPNO 11  
 PROCNO 1

F2 - Acquisition Parameters  
 Date\_ 20180602  
 Time 17.13 h  
 INSTRUM KU\_Avance\_1H\_400  
 PROBHD Z108618\_0245 ( )  
 PULPROG zgpg30  
 TD 65536  
 SOLVENT cdcl3  
 NS 256  
 DS 4  
 SWH 24038.461 Hz  
 FIDRES 0.733596 Hz  
 AQ 1.3631488 sec  
 RG 2050  
 DW 20.800 usec  
 DE 22.74 usec  
 TE 297.0 K  
 D1 2.00000000 sec  
 D11 0.03000000 sec  
 TD0 1  
 SFO1 100.5222401 MHz  
 NUC1 13C  
 P1 9.20 usec  
 PLW1 49.50000000 W  
 SFO2 399.7315989 MHz  
 NUC2 1H  
 CPDPRG[2] waltz16  
 FCFD2 90.00 usec  
 PLW2 16.47699928 W  
 PLW12 0.33068001 W  
 PLW13 0.26785001 W

F2 - Processing parameters  
 SI 65536  
 SF 100.5121884 MHz  
 WDW EM  
 SSB 0  
 LB 1.00 Hz  
 GB 0  
 PC 1.40

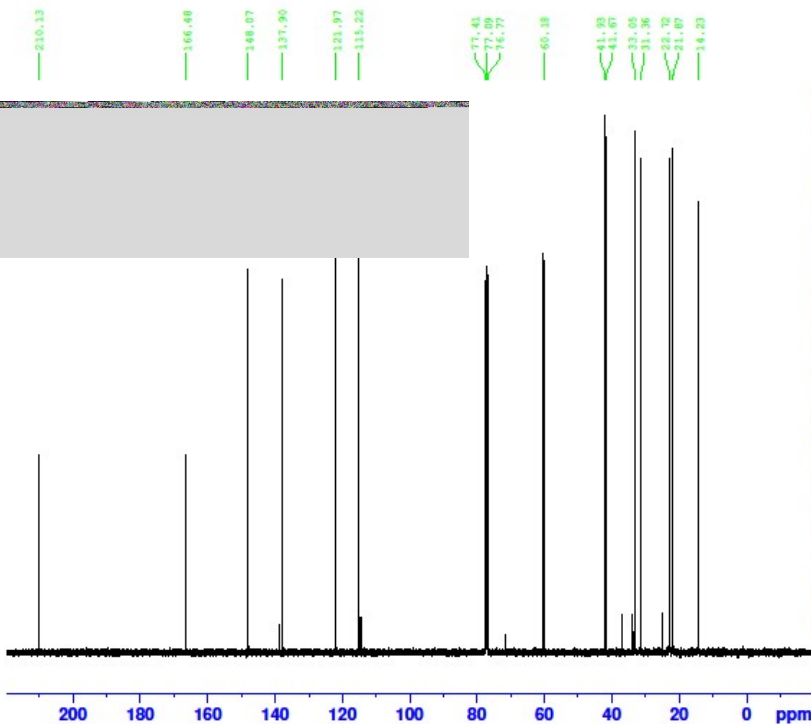



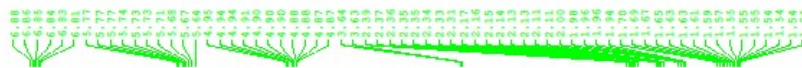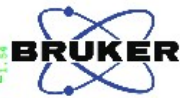

Current Data Parameters  
 NAME ARF157AP  
 EXPNO 10  
 PROCNO 1

F2 - Acquisition Parameters  
 Date\_ 20190228  
 Time 11.09 h  
 INSTRUM KU\_Avance\_iii\_400  
 PROBHD Z108618\_0245 ( )  
 PULPROG zg30  
 TD 65536  
 SOLVENT cdcl3  
 NS 16  
 DS 2  
 SWH 8223.685 Hz  
 FIDRES 0.250967 Hz  
 AQ 3.9845889 sec  
 RG 18  
 DW 60.800 usec  
 DE 16.30 usec  
 TE 294.7 K  
 D1 1.00000000 sec  
 TD0 1  
 SFO1 399.7324685 MHz  
 NUC1 1H  
 P1 12.75 usec  
 PLW1 16.47699928 W

F2 - Processing parameters  
 SI 65536  
 SF 399.7300000 MHz  
 WDW EM  
 SSB 0  
 LB 0.20 Hz  
 GB 0  
 PC 1.00

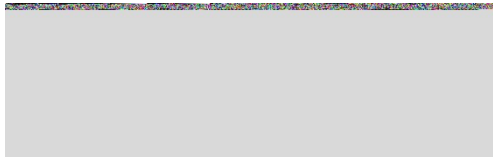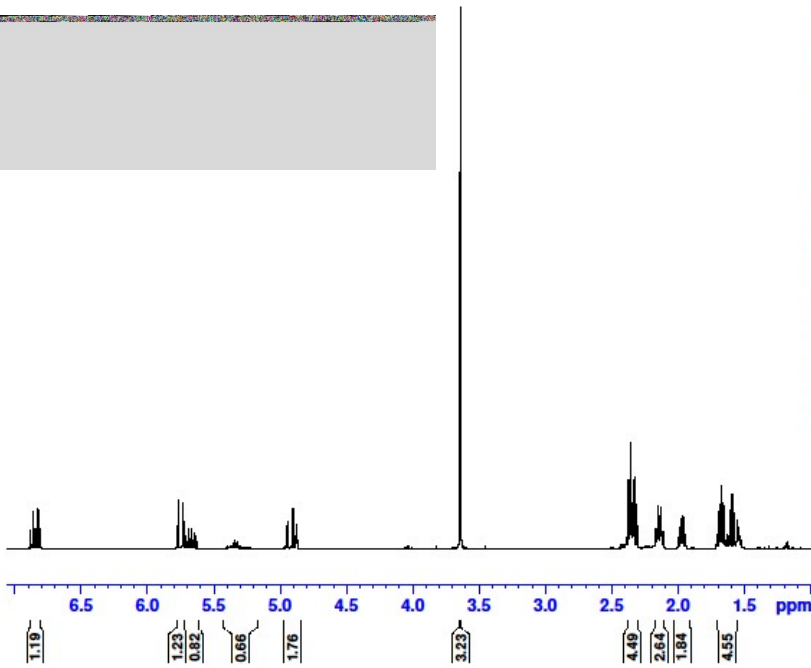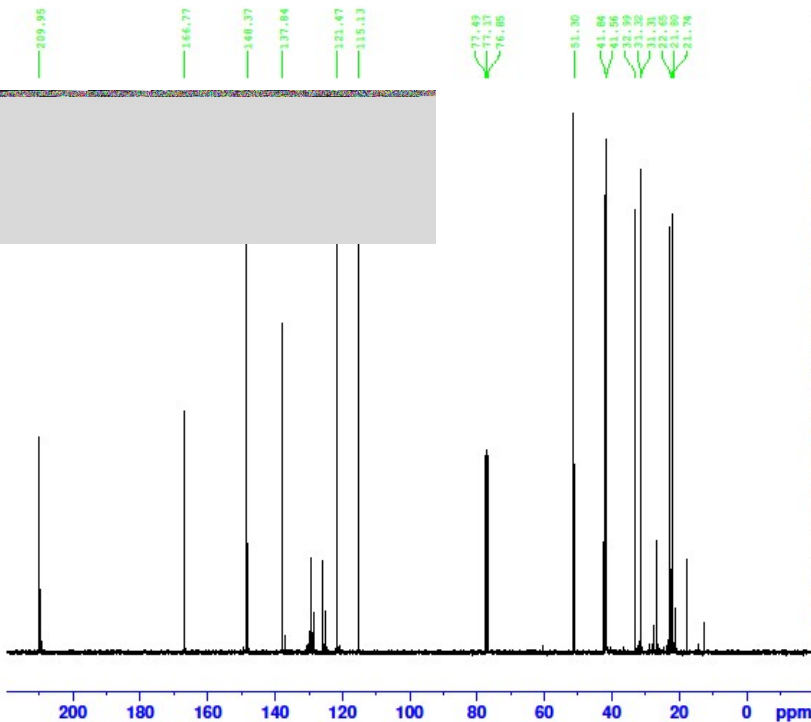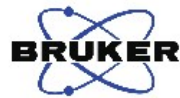

Current Data Parameters  
 NAME ARF157AP  
 EXPNO 11  
 PROCNO 1

F2 - Acquisition Parameters  
 Date\_ 20190228  
 Time 19.38 h  
 INSTRUM KU\_Avance\_iii\_400  
 PROBHD Z108618\_0245 ( )  
 PULPROG zgpg30  
 TD 65536  
 SOLVENT cdcl3  
 NS 256  
 DS 4  
 SWH 24038.461 Hz  
 FIDRES 0.733596 Hz  
 AQ 1.3631488 sec  
 RG 2050  
 DW 20.800 usec  
 DE 22.74 usec  
 TE 296.0 K  
 D1 2.00000000 sec  
 D11 0.03000000 sec  
 TD0 1  
 SFO1 100.5222401 MHz  
 NUC1 13C  
 P1 9.20 usec  
 PLW1 49.50000000 W  
 SFO2 399.7315989 MHz  
 NUC2 1H  
 CPDPRG[2] waltz16  
 FCFD2 90.00 usec  
 PLW2 16.47699928 W  
 PLW12 0.33068001 W  
 PLW13 0.26785001 W

F2 - Processing parameters  
 SI 65536  
 SF 100.5121884 MHz  
 WDW EM  
 SSB 0  
 LB 1.00 Hz  
 GB 0  
 PC 1.40

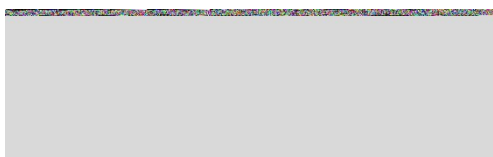





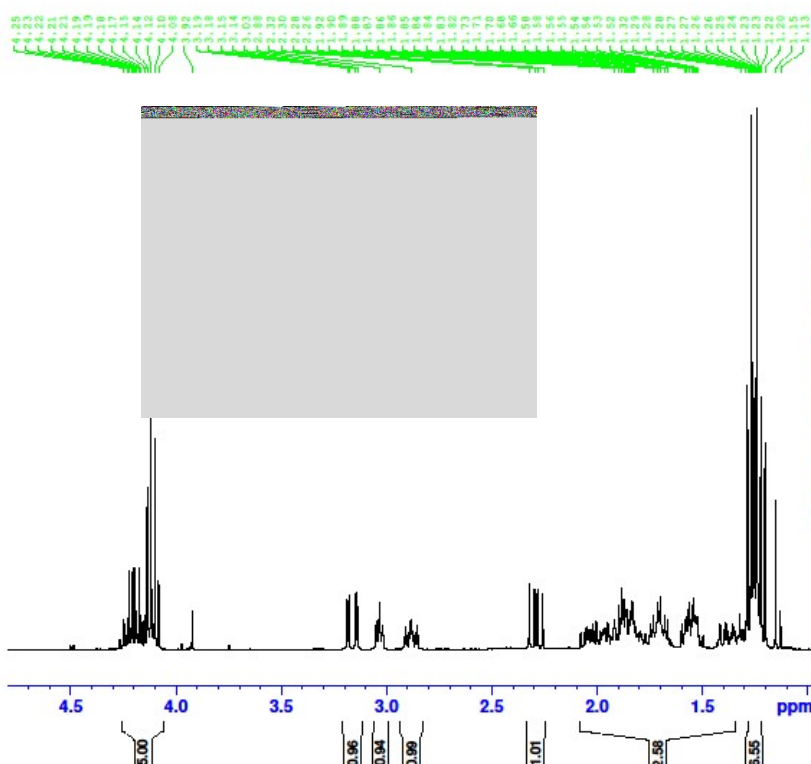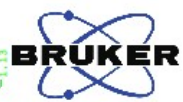

Current Data Parameters  
 NAME ARF056P  
 EXPNO 10  
 PROCNO 1

F2 - Acquisition Parameters  
 Date\_ 20180213  
 Time 9.24 h  
 INSTRUM KU\_Avance\_III\_400  
 PROBHD Z108618\_0245 ( )  
 PULPROG zg30  
 TD 65536  
 SOLVENT cdcl3  
 NS 16  
 DS 2  
 SWH 8223.685 Hz  
 FIDRES 0.250967 Hz  
 AQ 3.9845889 sec  
 RG 144  
 DW 60.800 usec  
 DE 16.30 usec  
 TE 295.9 K  
 D1 1.00000000 sec  
 TD0 1  
 SFO1 399.7324685 MHz  
 NUC1 1H  
 P1 12.75 usec  
 PLW1 16.47699928 W

F2 - Processing parameters  
 SI 65536  
 SF 399.7300098 MHz  
 WDW EM  
 SSB 0  
 LB 0.20 Hz  
 GB 0  
 PC 1.00

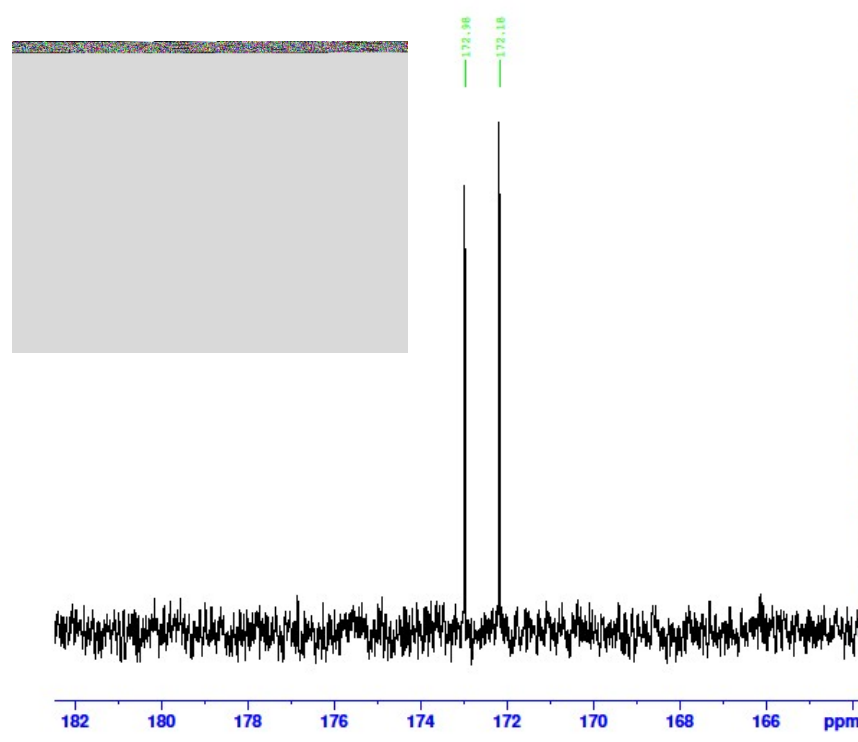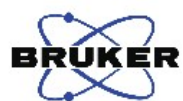

Current Data Parameters  
 NAME ARF056P  
 EXPNO 11  
 PROCNO 1

F2 - Acquisition Parameters  
 Date\_ 20180213  
 Time 9.39 h  
 INSTRUM KU\_Avance\_III\_400  
 PROBHD Z108618\_0245 ( )  
 PULPROG zgpg30  
 TD 65536  
 SOLVENT cdcl3  
 NS 256  
 DS 4  
 SWH 24038.461 Hz  
 FIDRES 0.733596 Hz  
 AQ 1.3631488 sec  
 RG 2050  
 DW 20.800 usec  
 DE 22.74 usec  
 TE 297.1 K  
 D1 2.00000000 sec  
 D11 0.03000000 sec  
 TD0 1  
 SFO1 100.5222401 MHz  
 NUC1 13C  
 P1 9.20 usec  
 PLW1 49.50000000 W  
 SFO2 399.7315989 MHz  
 NUC2 1H  
 CPDPRG2 waltz16  
 FCFD2 90.00 usec  
 PLW2 16.47699928 W  
 PLW12 0.33068001 W  
 PLW13 0.26785001 W

F2 - Processing parameters  
 SI 65536  
 SF 100.5121884 MHz  
 WDW EM  
 SSB 0  
 LB 1.00 Hz  
 GB 0  
 PC 1.40



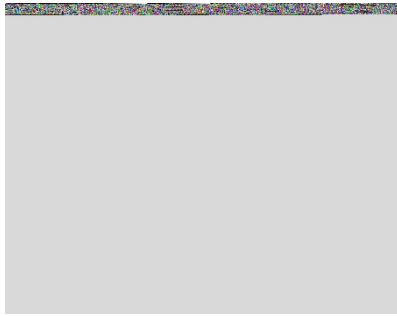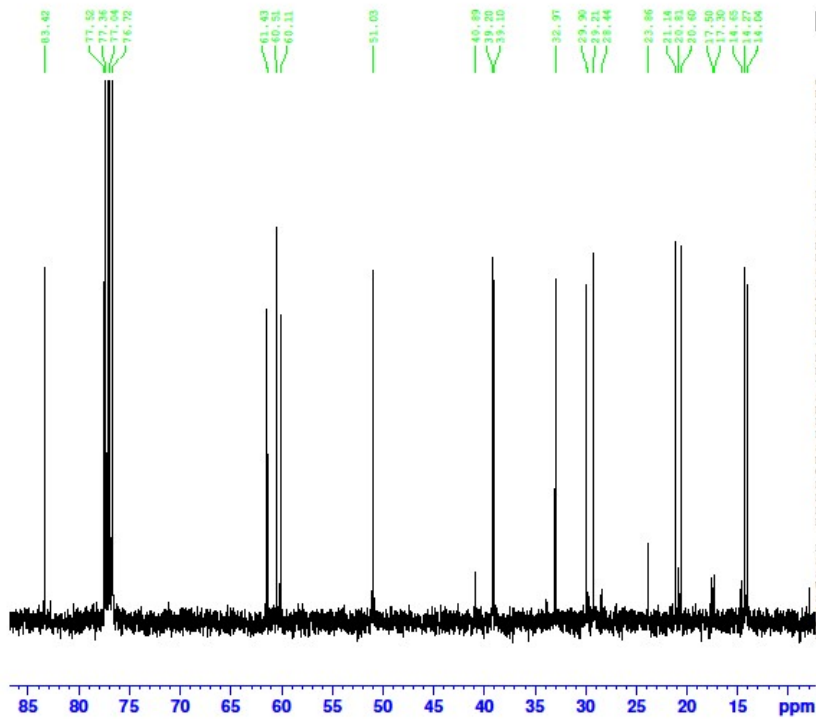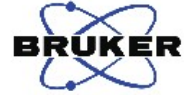

Current Data Parameters  
NAME ARF056P  
EXPNO 11  
PROCNO 1

F2 - Acquisition Parameters  
Date\_ 20180213  
Time 9:39 h  
INSTRUM KU\_Avance III\_400  
PROBHD Z108618\_0245 ( )  
PULPROG zgpg30  
TD 65536  
SOLVENT CDCl3  
NS 256  
DS 4  
SWH 24038.461 Hz  
FIDRES 0.133596 Hz  
AQ 1.3631488 sec  
RG 2050  
DW 20.800 usec  
DE 22.74 usec  
TE 297.1 K  
D1 2.0000000 sec  
D11 0.0300000 sec  
TD0 1  
SFO1 100.5222401 MHz  
NUC1 13C  
P1 9.20 usec  
PLW1 49.5000000 W  
SFO2 399.7315989 MHz  
NUC2 1H  
CPDPRG[2] waltz16  
PCPD2 90.00 usec  
PLW2 16.47699928 W  
PLW12 0.33068001 W  
PLW13 0.26185001 W

F2 - Processing parameters  
SI 65536  
SF 100.5121884 MHz  
WDW EM  
SSB 0  
LB 1.00 Hz  
GB 0  
PC 1.40

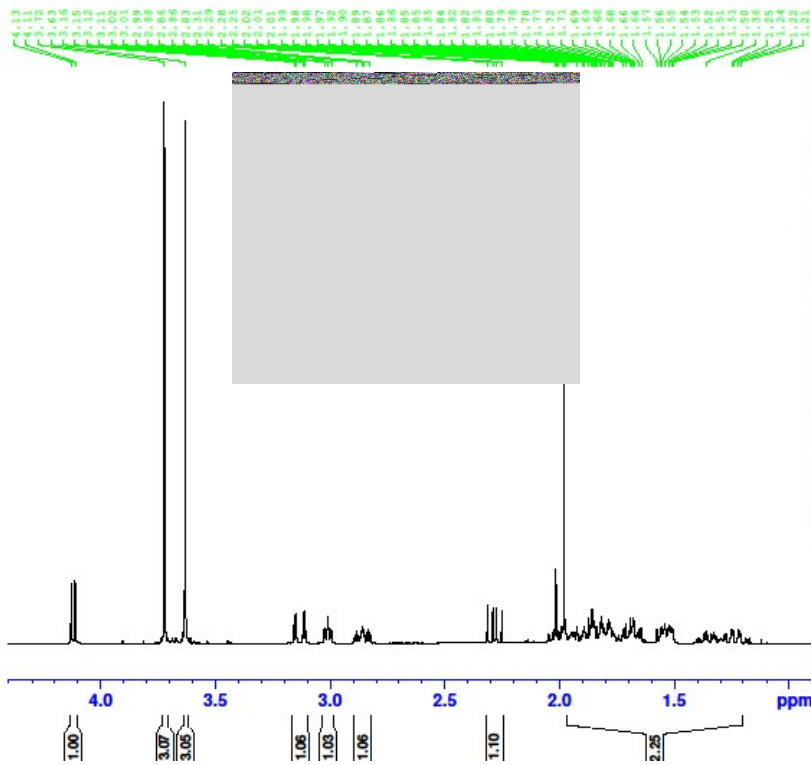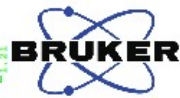

Current Data Parameters  
 NAME ARF156  
 EXPNO 20  
 PROCNO 1

F2 - Acquisition Parameters  
 Date\_ 20190206  
 Time 22.12 h  
 INSTRUM KU\_Avance\_1H1\_400  
 PROBHD Z108618\_0245 ( )  
 PULPROG zg30  
 TD 65536  
 SOLVENT cdcl3  
 NS 16  
 DS 2  
 SWH 8223.685 Hz  
 FIDRES 0.250967 Hz  
 AQ 3.9845889 sec  
 RG 71.8  
 DW 60.800 usec  
 DE 16.30 usec  
 TE 295.0 K  
 D1 1.00000000 sec  
 TD0 1  
 SFO1 399.7324685 MHz  
 NUC1 1H  
 P1 12.75 usec  
 PLW1 16.47699928 W

F2 - Processing parameters  
 SI 65536  
 SF 399.7300100 MHz  
 WDW EM  
 SSB 0  
 LB 0.20 Hz  
 GB 0  
 PC 1.00

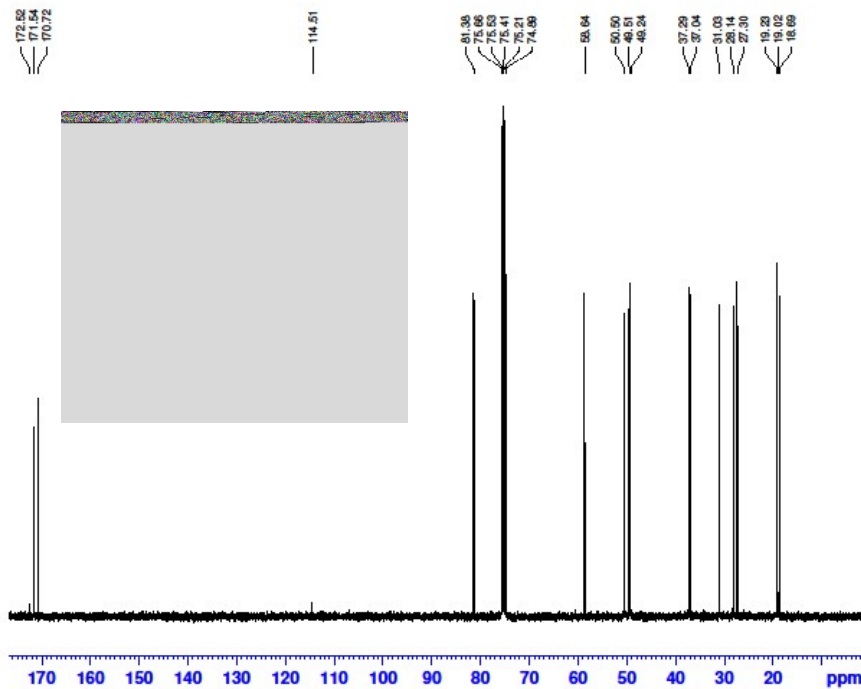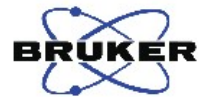

Current Data Parameters  
 NAME ARF156  
 EXPNO 21  
 PROCNO 1

F2 - Acquisition Parameters  
 Date\_ 20190206  
 Time 22.28 h  
 INSTRUM KU\_Avance\_1H1\_400  
 PROBHD Z108618\_0245 ( )  
 PULPROG zgpg30  
 TD 65536  
 SOLVENT cdcl3  
 NS 256  
 DS 4  
 SWH 24038.461 Hz  
 FIDRES 0.732596 Hz  
 AQ 1.3631488 sec  
 RG 2050  
 DW 20.800 usec  
 DE 22.74 usec  
 TE 296.0 K  
 D1 2.00000000 sec  
 D11 0.03000000 sec  
 TD0 1  
 SFO1 100.5222401 MHz  
 NUC1 13C  
 P1 9.20 usec  
 PLW1 49.50000000 W  
 SFO2 399.7315989 MHz  
 NUC2 1H  
 CPDPRG[2] waltz16  
 PCPD2 90.00 usec  
 PLW2 16.47699928 W  
 PLW12 0.33068001 W  
 PLW13 0.26785001 W

F2 - Processing parameters  
 SI 65536  
 SF 100.5123780 MHz  
 WDW EM  
 SSB 0  
 LB 1.00 Hz  
 GB 0  
 PC 1.40



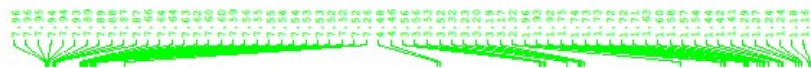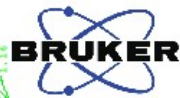

Current Data Parameters  
 NAME ARF198B  
 EXPNO 20  
 PROCNO 1

F2 - Acquisition Parameters  
 Date\_ 20190511  
 Time 12.04 h  
 INSTRUM KU\_Avance\_1H1\_400  
 PROBHD Z108618\_0245 ( )  
 PULPROG zg30  
 TD 65536  
 SOLVENT cdcl3  
 NS 16  
 DS 2  
 SWH 8223.685 Hz  
 FIDRES 0.250967 Hz  
 AQ 3.9845889 sec  
 RG 80.6  
 DW 60.800 usec  
 DE 16.30 usec  
 TE 294.9 K  
 D1 1.00000000 sec  
 TD0 1  
 SFO1 399.7324685 MHz  
 NUC1 1H  
 P1 12.75 usec  
 PLM1 16.47699928 W

F2 - Processing parameters  
 SI 65536  
 SF 399.7300096 MHz  
 WDW EM  
 SSB 0  
 LB 0.20 Hz  
 GB 0  
 PC 1.00

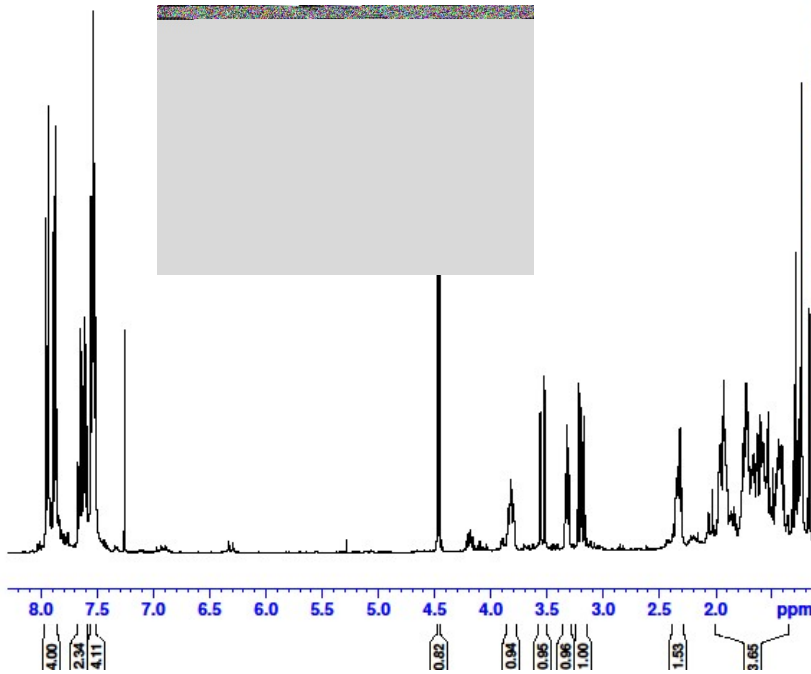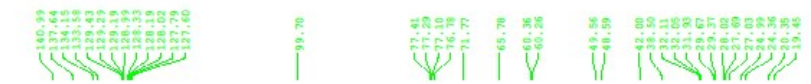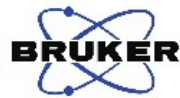

Current Data Parameters  
 NAME ARF198B  
 EXPNO 21  
 PROCNO 1

F2 - Acquisition Parameters  
 Date\_ 20190511  
 Time 12.19 h  
 INSTRUM KU\_Avance\_1H1\_400  
 PROBHD Z108618\_0245 ( )  
 PULPROG zgpg30  
 TD 65536  
 SOLVENT cdcl3  
 NS 256  
 DS 4  
 SWH 24038.461 Hz  
 FIDRES 0.733596 Hz  
 AQ 1.3631488 sec  
 RG 2050  
 DW 20.800 usec  
 DE 22.74 usec  
 TE 295.9 K  
 D1 2.00000000 sec  
 D11 0.03000000 sec  
 TD0 1  
 SFO1 100.5222401 MHz  
 NUC1 13C  
 P1 9.20 usec  
 PLM1 49.50000000 W  
 SFO2 399.7315989 MHz  
 NUC2 1H  
 CPDPRG2 waltz16  
 FCFD2 90.00 usec  
 PLM2 16.47699928 W  
 PLM12 0.33068001 W  
 PLM13 0.26785001 W

F2 - Processing parameters  
 SI 65536  
 SF 100.5121884 MHz  
 WDW EM  
 SSB 0  
 LB 1.00 Hz  
 GB 0  
 PC 1.40

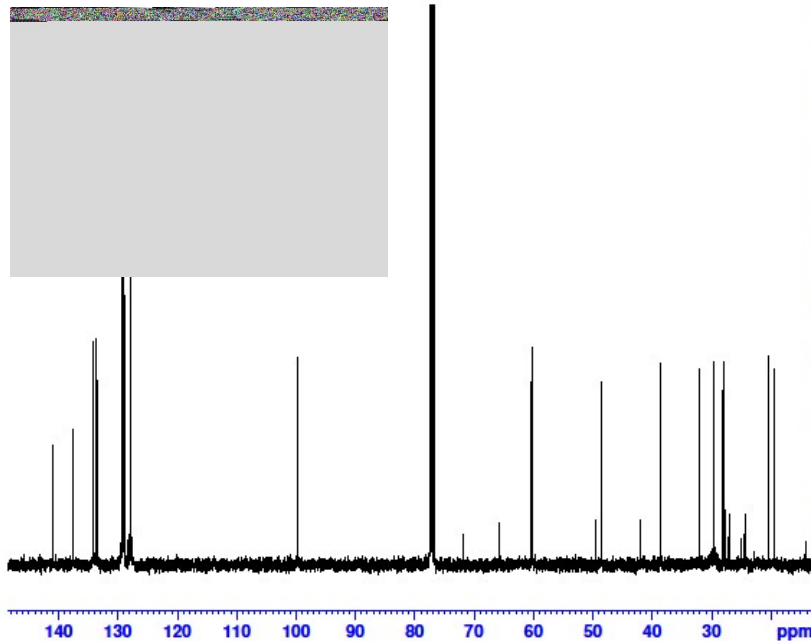



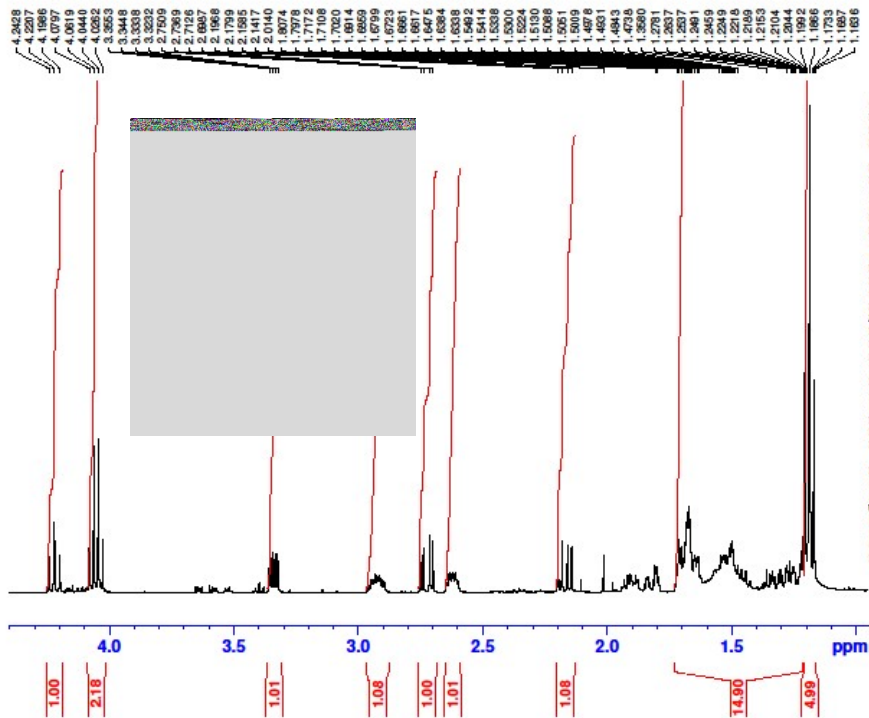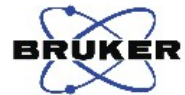

Current Data Parameters  
 NAME ARF091P1  
 EXPNO 10  
 PROCNO 1

F2 - Acquisition Parameters  
 Date\_ 20180608  
 Time 9.20 h  
 INSTRUM KU\_Avance\_III\_400  
 PROBHD Z108618\_0245 ( )  
 PULPROG zg30  
 TD 65536  
 SOLVENT CDCl3  
 NS 64  
 DS 2  
 SWH 8223.695 Hz  
 FIDRES 0.250967 Hz  
 AQ 3.9845889 sec  
 RG 228  
 DW 60.800 usec  
 DE 14.30 usec  
 TE 295.6 K  
 D1 1.00000000 sec  
 TDD 1  
 SFO1 399.7324685 MHz  
 NUC1 1H  
 P1 12.75 usec  
 PLW1 16.47699928 W

F2 - Processing parameters  
 SI 65536  
 SF 399.7300358 MHz  
 WDW EM  
 SSB 0  
 LB 0.20 Hz  
 GB 0  
 PC 1.00

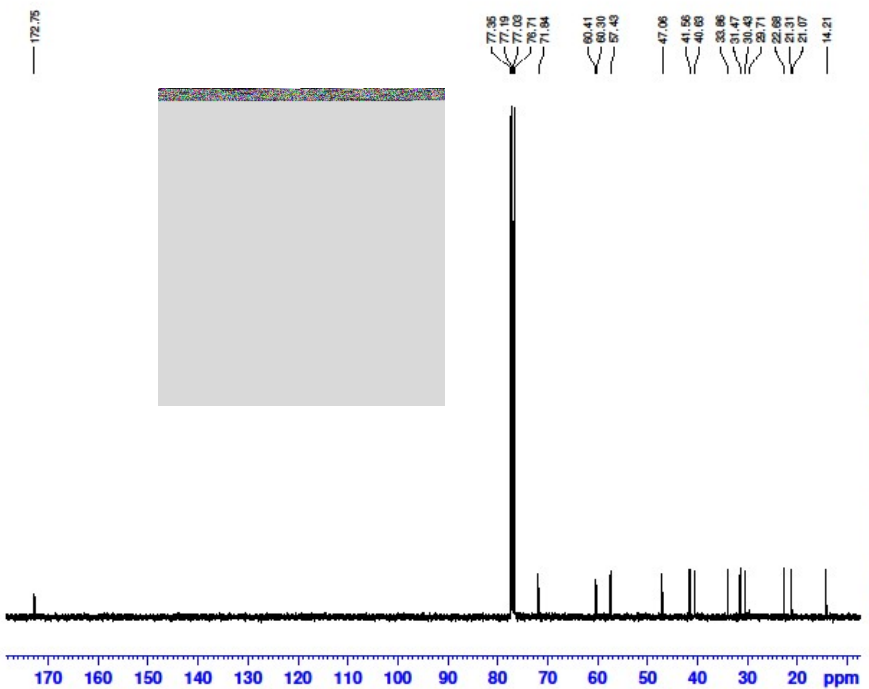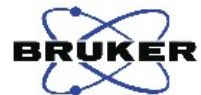

Current Data Parameters  
 NAME ARF091P1  
 EXPNO 21  
 PROCNO 1

F2 - Acquisition Parameters  
 Date\_ 20180608  
 Time 16.20 h  
 INSTRUM KU\_Avance\_III\_400  
 PROBHD Z108618\_0245 ( )  
 PULPROG zgpg30  
 TD 65536  
 SOLVENT CDCl3  
 NS 512  
 DS 4  
 SWH 24038.461 Hz  
 FIDRES 0.732596 Hz  
 AQ 1.3631488 sec  
 RG 2050  
 DW 20.800 usec  
 DE 22.74 usec  
 TE 297.0 K  
 D1 2.00000000 sec  
 D11 0.03000000 sec  
 TDD 1  
 SFO1 100.5222401 MHz  
 NUC1 13C  
 P1 9.20 usec  
 PLW1 49.5000000 W  
 SFO2 399.7315989 MHz  
 NUC2 1H  
 CPDPRG2 waltz16  
 PCPD2 90.00 usec  
 PLW2 16.47699928 W  
 PLW12 0.33068001 W  
 PLW13 0.26785001 W

F2 - Processing parameters  
 SI 65536  
 SF 100.5121884 MHz  
 WDW EM  
 SSB 0  
 LB 1.00 Hz  
 GB 0  
 PC 1.40





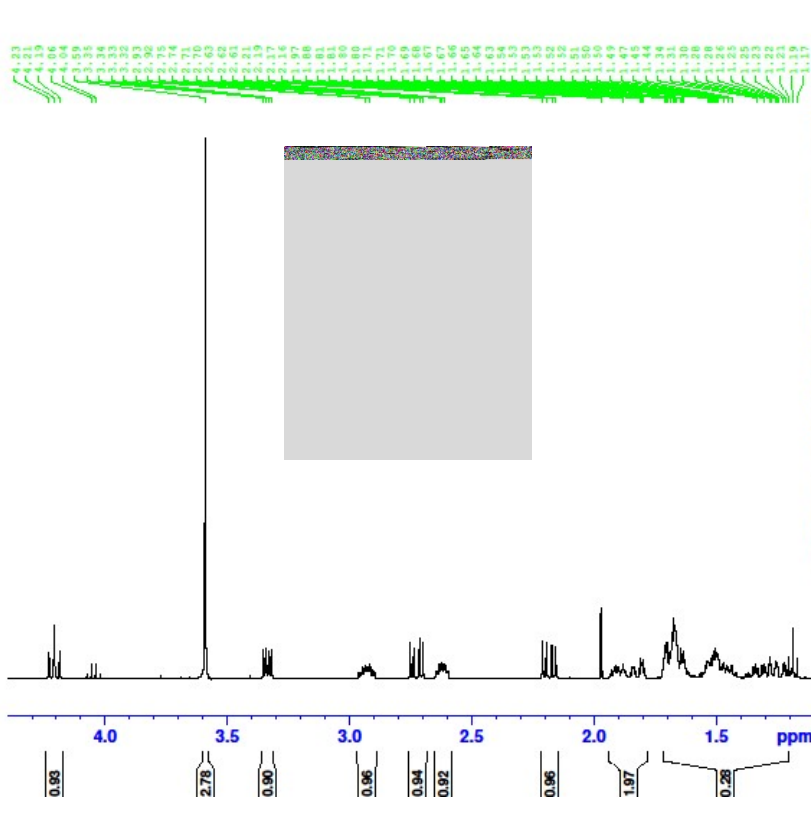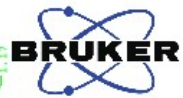

Current Data Parameters  
 NAME AR165B  
 EXPNO 20  
 PROCNO 1

F2 - Acquisition Parameters  
 Date\_ 20190304  
 Time 16.32 h  
 INSTRUM KU\_Avance\_fii\_400  
 PROBHD Z108618\_0245 ( )  
 PULPROG zg30  
 TD 65536  
 SOLVENT cdcl3  
 NS 16  
 DS 2  
 SWH 8223.685 Hz  
 FIDRES 0.250967 Hz  
 AQ 3.9845889 sec  
 RG 36  
 DW 60.800 usec  
 DE 16.30 usec  
 TE 295.6 K  
 D1 1.00000000 sec  
 TD0 1  
 SFO1 399.7324685 MHz  
 NUC1 1H  
 P1 12.75 usec  
 PLM1 16.47699928 W

F2 - Processing parameters  
 SI 65536  
 SF 399.7300098 MHz  
 WDW EM  
 SSB 0  
 LB 0.20 Hz  
 GB 0  
 PC 1.00

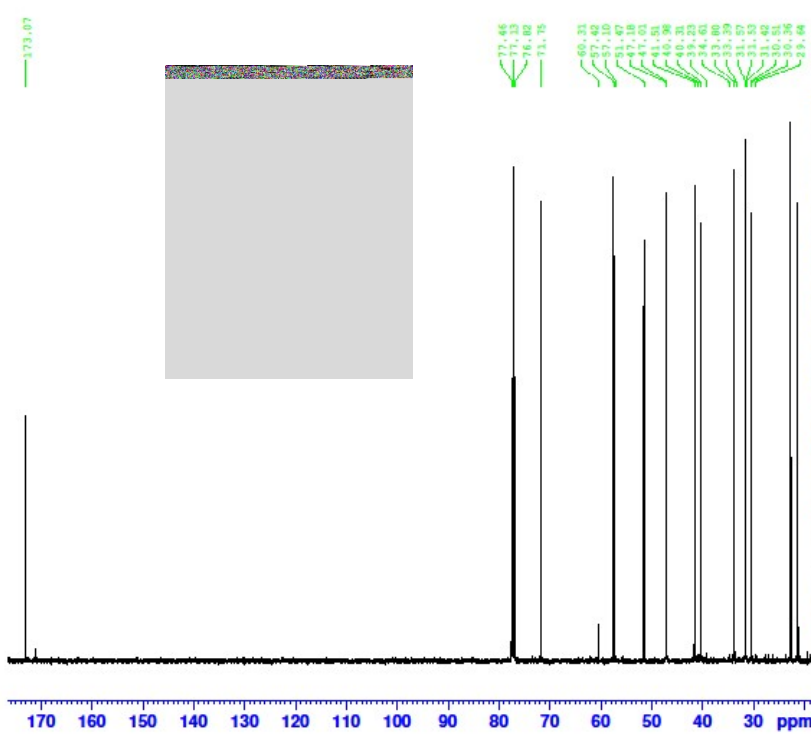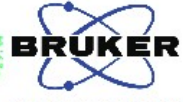

Current Data Parameters  
 NAME AR165B  
 EXPNO 21  
 PROCNO 1

F2 - Acquisition Parameters  
 Date\_ 20190305  
 Time 7.57 h  
 INSTRUM KU\_Avance\_fii\_400  
 PROBHD Z108618\_0245 ( )  
 PULPROG zgpg30  
 TD 65536  
 SOLVENT cdcl3  
 NS 256  
 DS 4  
 SWH 24038.461 Hz  
 FIDRES 0.733596 Hz  
 AQ 1.3631488 sec  
 RG 2050  
 DW 20.800 usec  
 DE 22.74 usec  
 TE 295.9 K  
 D1 2.00000000 sec  
 D11 0.03000000 sec  
 TD0 1  
 SFO1 100.5222401 MHz  
 NUC1 13C  
 P1 9.20 usec  
 PLM1 49.50000000 W  
 SFO2 399.7315989 MHz  
 NUC2 1H  
 CPDPRG2 waltz16  
 FCFD2 90.00 usec  
 PLM2 16.47699928 W  
 PLM12 0.33068001 W  
 PLM13 0.26785001 W

F2 - Processing parameters  
 SI 65536  
 SF 100.5121884 MHz  
 WDW EM  
 SSB 0  
 LB 1.00 Hz  
 GB 0  
 PC 1.40



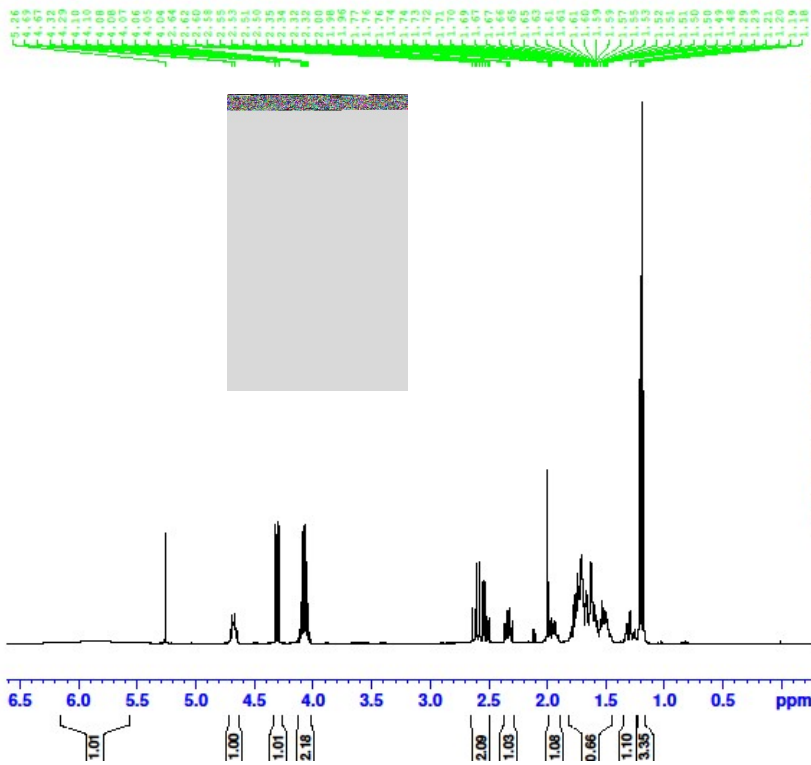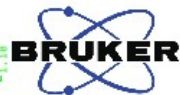

Current Data Parameters  
 NAME ARF129  
 EXPNO 20  
 PROCNO 1

F2 - Acquisition Parameters  
 Date\_ 20181022  
 Time 15.41 h  
 INSTRUM KU\_Avance\_III\_400  
 PROBHD Z108618\_0245 ( )  
 PULPROG zg30  
 TD 65536  
 SOLVENT cdcl3  
 NS 16  
 DS 2  
 SWH 8223.685 Hz  
 FIDRES 0.250967 Hz  
 AQ 3.9845889 sec  
 RG 40.3  
 DW 60.800 usec  
 DE 16.30 usec  
 TE 295.0 K  
 D1 1.00000000 sec  
 TD0 1  
 SFO1 399.7324685 MHz  
 NUC1 1H  
 P1 12.75 usec  
 PLW1 16.47699928 W

F2 - Processing parameters  
 SI 65536  
 SF 399.7300097 MHz  
 WDW EM  
 SSB 0  
 LB 0.20 Hz  
 GB 0  
 PC 1.00

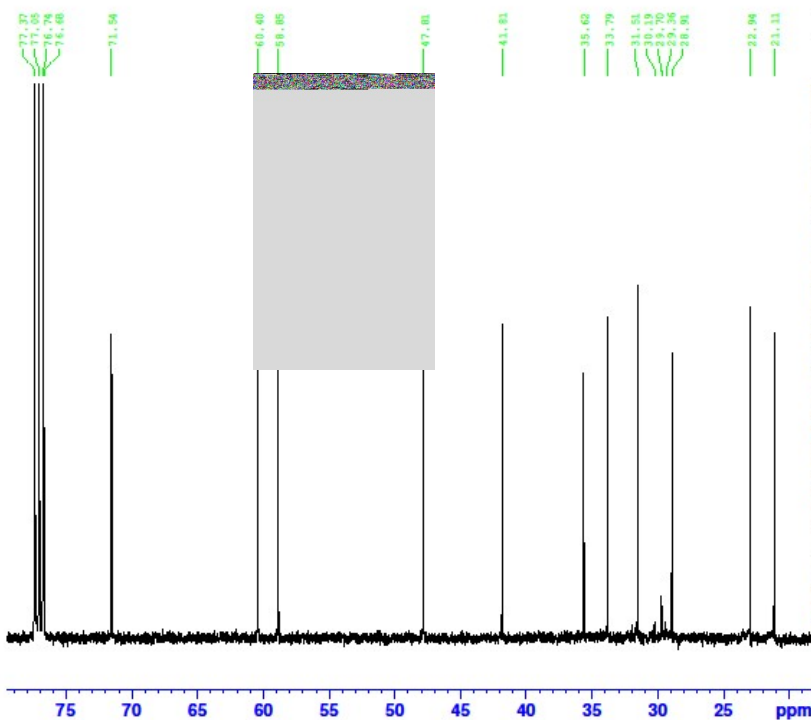

Current Data Parameters  
 NAME ARF095A  
 EXPNO 11  
 PROCNO 1

F2 - Acquisition Parameters  
 Date\_ 20180628  
 Time 12.46 h  
 INSTRUM KU\_Avance\_III\_400  
 PROBHD Z108618\_0245 ( )  
 PULPROG zgpg30  
 TD 65536  
 SOLVENT cdcl3  
 NS 256  
 DS 4  
 SWH 24038.461 Hz  
 FIDRES 0.733596 Hz  
 AQ 1.3631488 sec  
 RG 2050  
 DW 20.800 usec  
 DE 22.74 usec  
 TE 297.1 K  
 D1 2.00000000 sec  
 D11 0.03000000 sec  
 TD0 1  
 SFO1 100.5222401 MHz  
 NUC1 13C  
 P1 9.20 usec  
 PLW1 49.50000000 W  
 SFO2 399.7315989 MHz  
 NUC2 1H  
 CPDPRG[2] waltz16  
 FCFD2 90.00 usec  
 PLW2 16.47699928 W  
 PLW12 0.33068001 W  
 PLW13 0.26785001 W

F2 - Processing parameters  
 SI 65536  
 SF 100.5121884 MHz  
 WDW EM  
 SSB 0  
 LB 1.00 Hz  
 GB 0  
 PC 1.40



250A1 TLC top spot

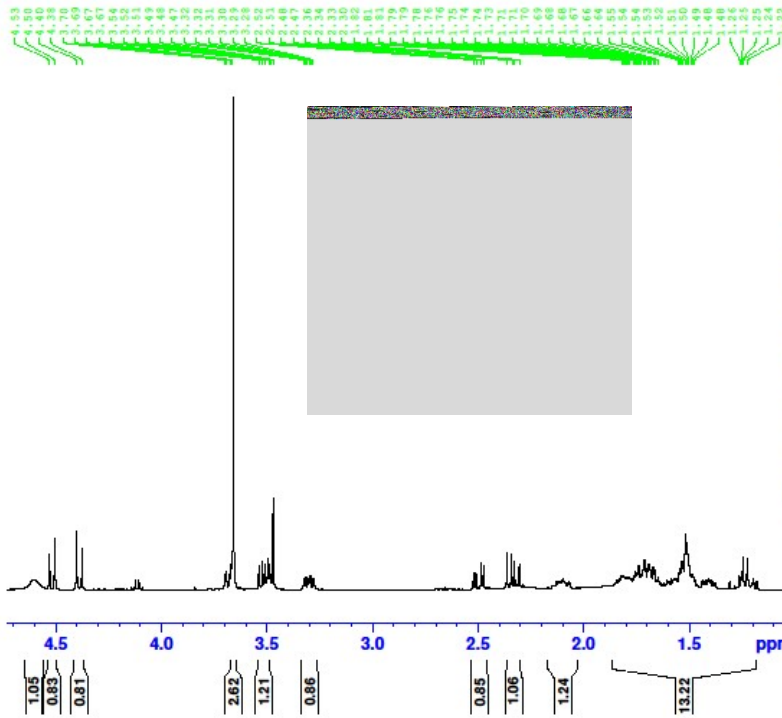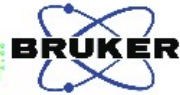

Current Data Parameters  
 NAME ARF250A1  
 EXPNO 10  
 PROCNO 1

F2 - Acquisition Parameters  
 Date\_ 20191207  
 Time 14.50 h  
 INSTRUM KU\_Avance\_III\_400  
 PROBHD Z108618\_0245 ( )  
 PULPROG zg30  
 TD 65536  
 SOLVENT cdcl3  
 NS 16  
 DS 2  
 SWH 8223.685 Hz  
 FIDRES 0.250967 Hz  
 AQ 3.9845889 sec  
 RG 128  
 DW 60.800 usec  
 DE 16.30 usec  
 TE 295.2 K  
 D1 1.00000000 sec  
 TD0 1  
 SFO1 399.7324685 MHz  
 NUC1 1H  
 P1 12.75 usec  
 PLW1 16.47699928 W

F2 - Processing parameters  
 SI 65536  
 SF 399.7300048 MHz  
 WDW EM  
 SSB 0  
 LB 0.20 Hz  
 GB 0  
 PC 1.00

250A1 TLC top spot

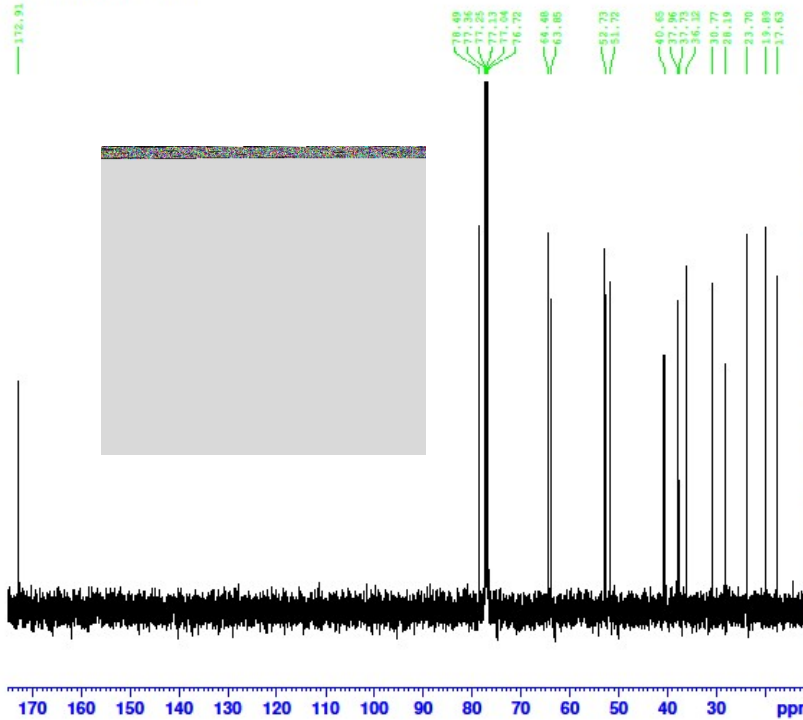

Current Data Parameters  
 NAME ARF250A1  
 EXPNO 11  
 PROCNO 1

F2 - Acquisition Parameters  
 Date\_ 20191207  
 Time 15.05 h  
 INSTRUM KU\_Avance\_III\_400  
 PROBHD Z108618\_0245 ( )  
 PULPROG zgpg30  
 TD 65536  
 SOLVENT cdcl3  
 NS 256  
 DS 4  
 SWH 24038.461 Hz  
 FIDRES 0.733596 Hz  
 AQ 1.3631488 sec  
 RG 2050  
 DW 20.800 usec  
 DE 22.74 usec  
 TE 296.1 K  
 D1 2.00000000 sec  
 D11 0.03000000 sec  
 TD0 1  
 SFO1 100.5222401 MHz  
 NUC1 13C  
 P1 9.20 usec  
 PLW1 49.50000000 W  
 SFO2 399.7315989 MHz  
 NUC2 1H  
 CPDPRG2 waltz16  
 PCPD2 90.00 usec  
 PLW2 16.47699928 W  
 PLW12 0.33068001 W  
 PLW13 0.26785001 W

F2 - Processing parameters  
 SI 65536  
 SF 100.5121884 MHz  
 WDW EM  
 SSB 0  
 LB 1.00 Hz  
 GB 0  
 PC 1.40



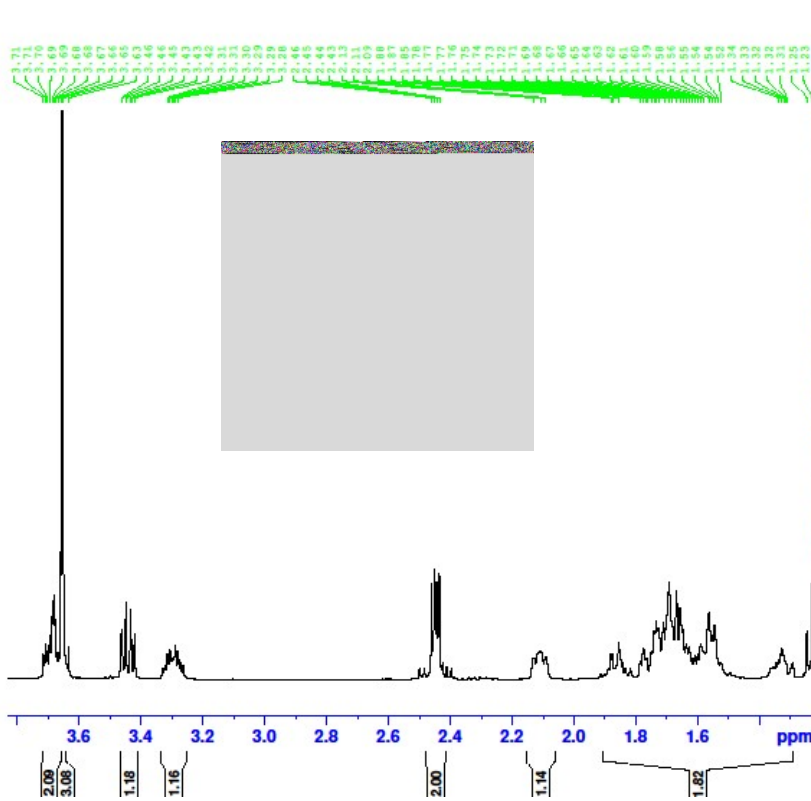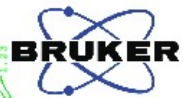

Current Data Parameters  
 NAME ARF253B  
 EXPNO 20  
 PROCNO 1

F2 - Acquisition Parameters  
 Date\_ 20191207  
 Time 10.40 h  
 INSTRUM KU\_Avance\_1H1\_400  
 PROBHD Z108618\_0245 ( )  
 PULPROG zg30  
 TD 65536  
 SOLVENT cdcl3  
 NS 16  
 DS 2  
 SWH 8223.685 Hz  
 FIDRES 0.250967 Hz  
 AQ 3.9845889 sec  
 RG 64  
 DW 60.800 usec  
 DE 16.30 usec  
 TE 295.0 K  
 D1 1.00000000 sec  
 TD0 1  
 SFO1 399.7324685 MHz  
 NUC1 1H  
 F1 12.75 usec  
 PLW1 16.47699928 W

F2 - Processing parameters  
 SI 65536  
 SF 399.7300097 MHz  
 WDW EM  
 SSB 0  
 LB 0.20 Hz  
 GB 0  
 PC 1.00

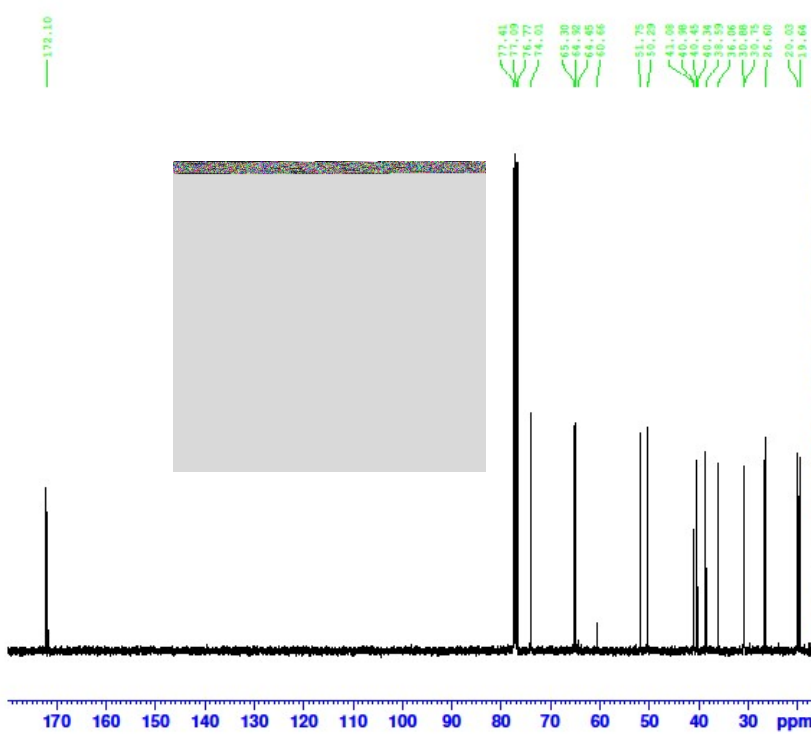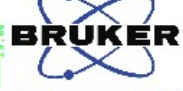

Current Data Parameters  
 NAME ARF253B  
 EXPNO 21  
 PROCNO 1

F2 - Acquisition Parameters  
 Date\_ 20191207  
 Time 10.56 h  
 INSTRUM KU\_Avance\_1H1\_400  
 PROBHD Z108618\_0245 ( )  
 PULPROG zgpg30  
 TD 65536  
 SOLVENT cdcl3  
 NS 256  
 DS 4  
 SWH 24038.461 Hz  
 FIDRES 0.733596 Hz  
 AQ 1.3631488 sec  
 RG 2050  
 DW 20.800 usec  
 DE 22.74 usec  
 TE 296.1 K  
 D1 2.00000000 sec  
 D11 0.03000000 sec  
 TD0 1  
 SFO1 100.5222401 MHz  
 NUC1 13C  
 F1 9.20 usec  
 PLW1 49.50000000 W  
 SFO2 399.7315989 MHz  
 NUC2 1H  
 CPDPRG[2] waltz16  
 FCFD2 90.00 usec  
 PLW2 16.47699928 W  
 PLW12 0.33068001 W  
 PLW13 0.26785001 W

F2 - Processing parameters  
 SI 65536  
 SF 100.5121872 MHz  
 WDW EM  
 SSB 0  
 LB 1.00 Hz  
 GB 0  
 PC 1.40





ARF256

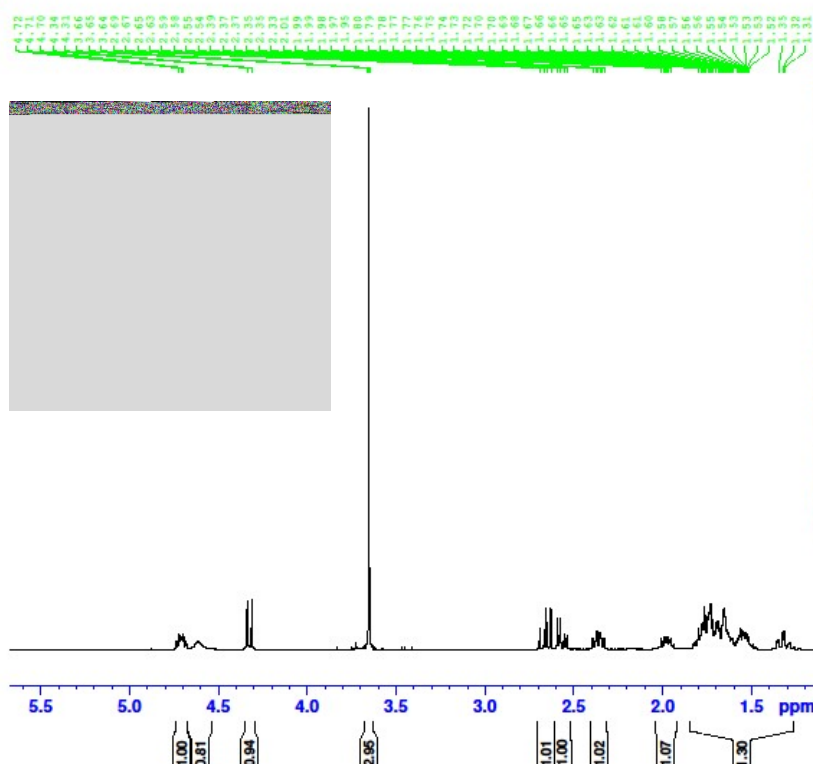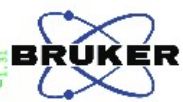

Current Data Parameters  
 NAME ARF256  
 EXPNO 10  
 PROCNO 1

F2 - Acquisition Parameters  
 Date\_ 20191215  
 Time 11.35 h  
 INSTRUM KU\_Avance III\_400  
 PROBHD Z108618\_0245 ( )  
 PULPROG zg30  
 TD 65536  
 SOLVENT cdcl3  
 NS 16  
 DS 2  
 SWH 8223.685 Hz  
 FIDRES 0.250967 Hz  
 AQ 3.9845889 sec  
 RG 90.5  
 DW 60.800 usec  
 DE 16.30 usec  
 TE 294.7 K  
 D1 1.00000000 sec  
 TD0 1  
 SFO1 399.7324685 MHz  
 NUC1 1H  
 P1 12.75 usec  
 PLW1 16.47699928 W

F2 - Processing parameters  
 SI 65536  
 SF 399.7300046 MHz  
 WDW EM  
 SSB 0  
 LB 0.20 Hz  
 GB 0  
 PC 1.00

ARF256

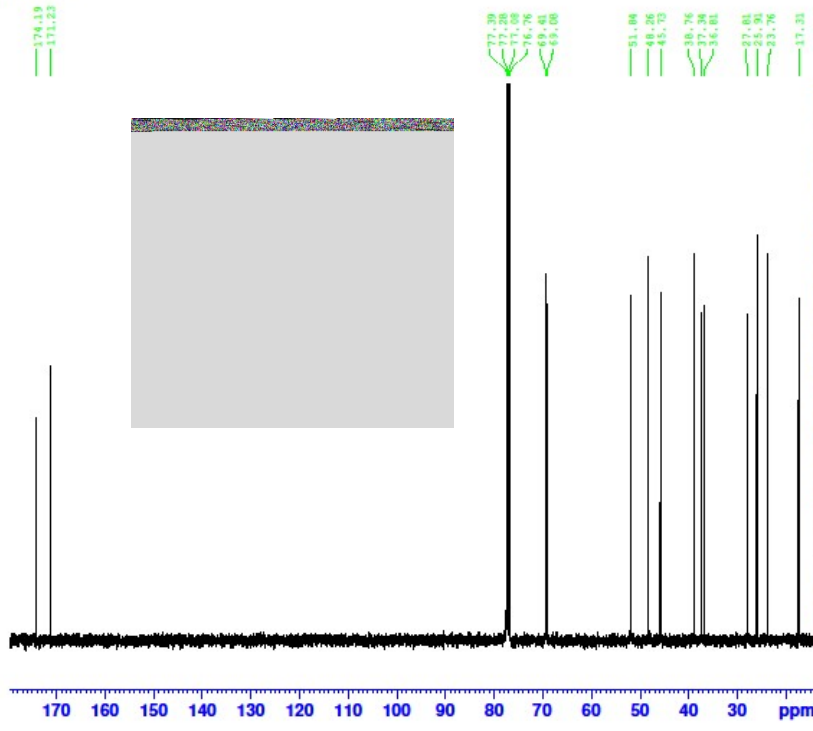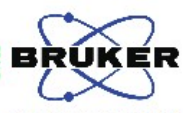

Current Data Parameters  
 NAME ARF256  
 EXPNO 11  
 PROCNO 1

F2 - Acquisition Parameters  
 Date\_ 20191215  
 Time 11.50 h  
 INSTRUM KU\_Avance III\_400  
 PROBHD Z108618\_0245 ( )  
 PULPROG zgpg30  
 TD 65536  
 SOLVENT cdcl3  
 NS 256  
 DS 4  
 SWH 24038.461 Hz  
 FIDRES 0.733596 Hz  
 AQ 1.3631488 sec  
 RG 2050  
 DW 20.800 usec  
 DE 22.74 usec  
 TE 295.8 K  
 D1 2.00000000 sec  
 D11 0.03000000 sec  
 TD0 1  
 SFO1 100.5222401 MHz  
 NUC1 13C  
 P1 9.20 usec  
 PLW1 49.50000000 W  
 SFO2 399.7315989 MHz  
 NUC2 1H  
 CPDPRG2 waltz16  
 PCPD2 90.00 usec  
 PLW2 16.47699928 W  
 PLW12 0.33068001 W  
 PLW13 0.26785001 W

F2 - Processing parameters  
 SI 65536  
 SF 100.5121884 MHz  
 WDW EM  
 SSB 0  
 LB 1.00 Hz  
 GB 0  
 PC 1.40



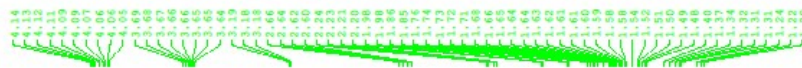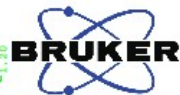

Current Data Parameters  
 NAME ARF107P  
 EXPNO 20  
 PROCNO 1

F2 - Acquisition Parameters  
 Date\_ 20180815  
 Time 8.26 h  
 INSTRUM KU\_Avance\_III\_400  
 PROBHD Z108618\_0245 ( )  
 PULPROG zg30  
 TD 65536  
 SOLVENT cdcl3  
 NS 16  
 DS 2  
 SWH 8223.685 Hz  
 FIDRES 0.250967 Hz  
 AQ 3.9845889 sec  
 RG 45.2  
 DW 60.800 usec  
 DE 16.30 usec  
 TE 473.2 K  
 D1 1.00000000 sec  
 TD0 1  
 SFO1 399.7324685 MHz  
 NUC1 1H  
 P1 12.75 usec  
 PLM1 16.47699928 W

F2 - Processing parameters  
 SI 65536  
 SF 399.7300097 MHz  
 WDW EM  
 SSB 0  
 LB 0.20 Hz  
 GB 0  
 PC 1.00

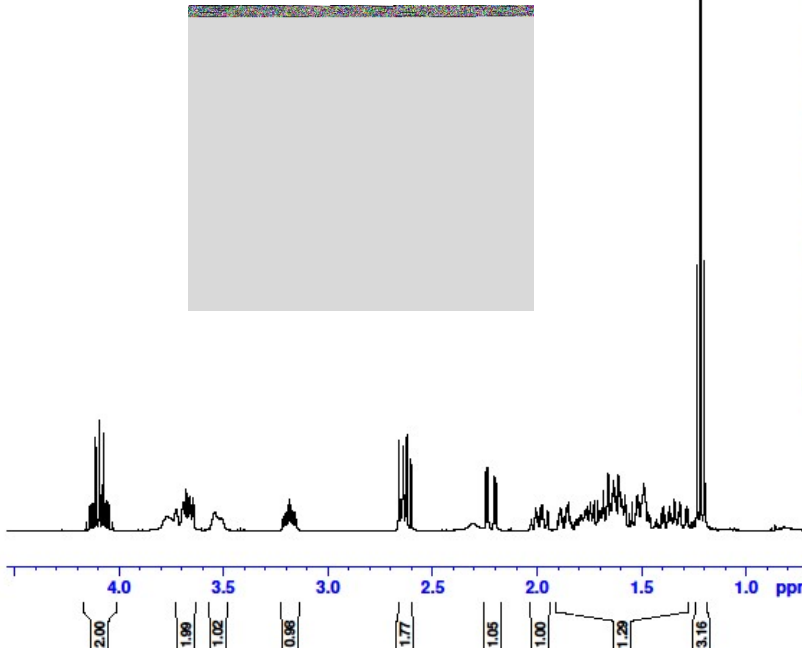

Current Data Parameters  
 NAME ARF107P  
 EXPNO 21  
 PROCNO 1

F2 - Acquisition Parameters  
 Date\_ 20180815  
 Time 8.42 h  
 INSTRUM KU\_Avance\_III\_400  
 PROBHD Z108618\_0245 ( )  
 PULPROG zgpg30  
 TD 65536  
 SOLVENT cdcl3  
 NS 256  
 DS 4  
 SWH 24038.461 Hz  
 FIDRES 0.733596 Hz  
 AQ 1.3631488 sec  
 RG 2050  
 DW 20.800 usec  
 DE 22.74 usec  
 TE 473.2 K  
 D1 2.00000000 sec  
 D11 0.03000000 sec  
 TD0 1  
 SFO1 100.5222401 MHz  
 NUC1 13C  
 P1 9.20 usec  
 PLM1 49.50000000 W  
 SFO2 399.7315989 MHz  
 NUC2 1H  
 CPDPRG2 waltz16  
 FCFD2 90.00 usec  
 PLM2 16.47699928 W  
 PLM12 0.33068001 W  
 PLM13 0.26785001 W

F2 - Processing parameters  
 SI 65536  
 SF 100.5121884 MHz  
 WDW EM  
 SSB 0  
 LB 1.00 Hz  
 GB 0  
 PC 1.40

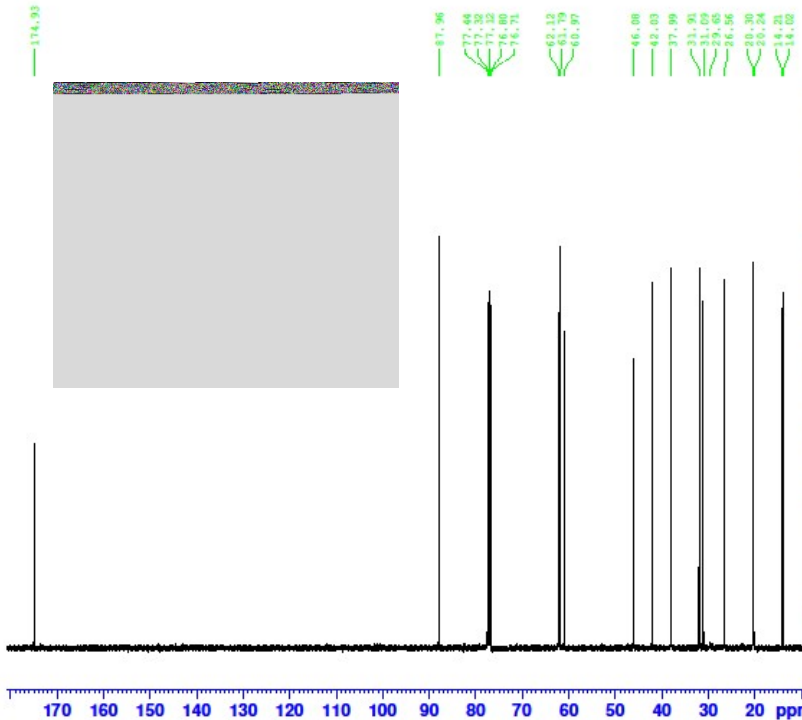



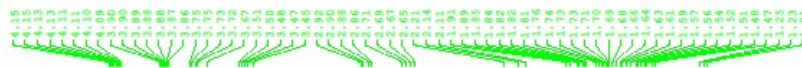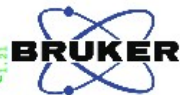

Current Data Parameters  
 NAME ARF162A  
 EXPNO 10  
 PROCNO 1

F2 - Acquisition Parameters  
 Date\_ 20190220  
 Time 12.19 h  
 INSTRUM KU\_Avance\_1ii\_400  
 PROBHD Z108618\_0245 ( )  
 PULPROG zg30  
 TD 65536  
 SOLVENT CDCl3  
 NS 16  
 DS 2  
 SWH 8223.685 Hz  
 FIDRES 0.250967 Hz  
 AQ 3.9845889 sec  
 RG 101  
 DW 60.800 usec  
 DE 16.30 usec  
 TE 295.0 K  
 D1 1.00000000 sec  
 TD0 1  
 SFO1 399.7324685 MHz  
 NUC1 1H  
 P1 12.75 usec  
 PLW1 16.47699928 W

F2 - Processing parameters  
 SI 65536  
 SF 399.7300049 MHz  
 WDW EM  
 SSB 0  
 LB 0.20 Hz  
 GB 0  
 PC 1.00

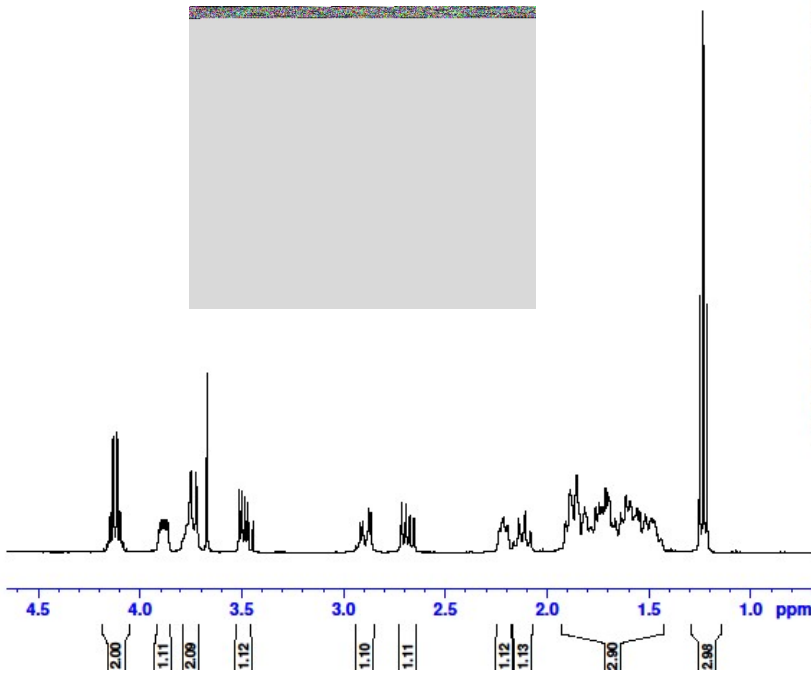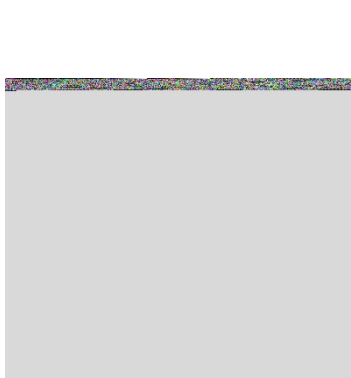

Current Data Parameters  
 NAME ARF162A  
 EXPNO 11  
 PROCNO 1

F2 - Acquisition Parameters  
 Date\_ 20190220  
 Time 17.53 h  
 INSTRUM KU\_Avance\_1ii\_400  
 PROBHD Z108618\_0245 ( )  
 PULPROG zgpg30  
 TD 65536  
 SOLVENT CDCl3  
 NS 256  
 DS 4  
 SWH 24038.461 Hz  
 FIDRES 0.733596 Hz  
 AQ 1.3631488 sec  
 RG 2050  
 DW 20.800 usec  
 DE 22.74 usec  
 TE 296.2 K  
 D1 2.00000000 sec  
 D11 0.03000000 sec  
 TD0 1  
 SFO1 100.5222401 MHz  
 NUC1 13C  
 P1 9.20 usec  
 PLW1 49.50000000 W  
 SFO2 399.7315989 MHz  
 NUC2 1H  
 CPDPRG[2] waltz16  
 PCPD2 90.00 usec  
 PLW2 16.47699928 W  
 PLW12 0.33068001 W  
 PLW13 0.26785001 W

F2 - Processing parameters  
 SI 65536  
 SF 100.5121884 MHz  
 WDW EM  
 SSB 0  
 LB 1.00 Hz  
 GB 0  
 PC 1.40

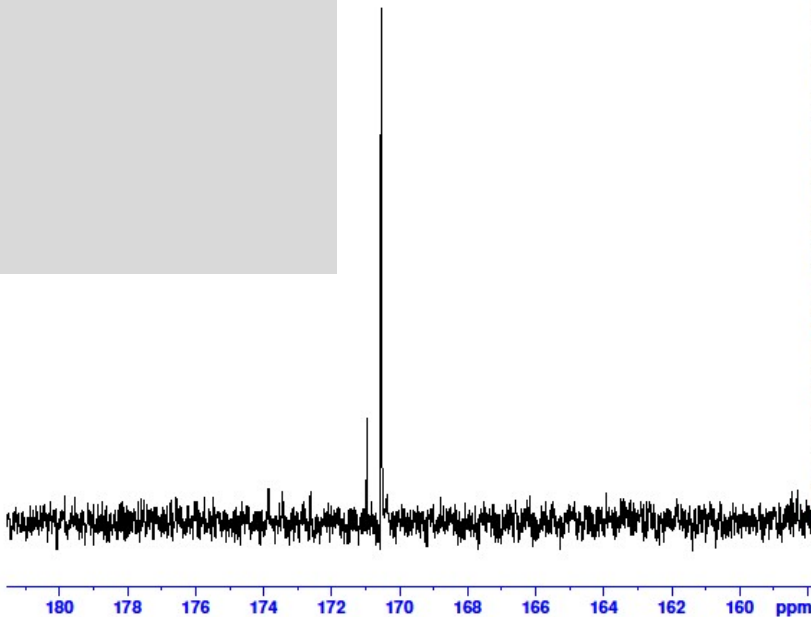



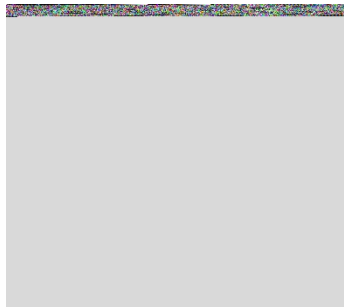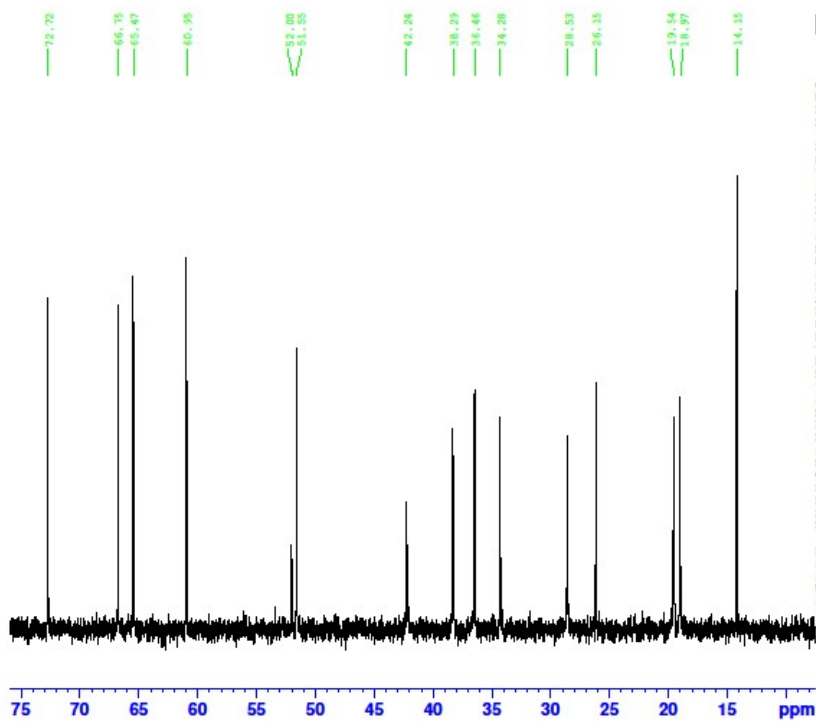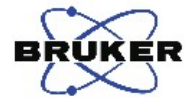

Current Data Parameters  
NAME ARF162A  
EXPNO 11  
PROCNO 1

F2 - Acquisition Parameters  
Date\_ 20190220  
Time 17.53 h  
INSTRUM KU\_Avance III\_400  
PROBHD Z108618\_0245 ( )  
PULPROG zgpg30  
TD 65536  
SOLVENT cnc13  
NS 256  
DS 4  
SWH 24038.461 Hz  
FIDRES 0.733596 Hz  
AQ 1.3631488 sec  
RG 2050  
DW 20.800 usec  
DE 22.74 usec  
TE 296.2 K  
D1 2.0000000 sec  
D11 0.0300000 sec  
TD0 1  
SFO1 100.5222401 MHz  
NUC1 13C  
P1 9.20 usec  
PLM1 49.5000000 W  
SFO2 399.7315989 MHz  
NUC2 1H  
CDEPRG[2] waltz16  
PCPD2 90.00 usec  
PLM2 16.47699928 W  
PLM12 0.33068001 W  
PLM13 0.26785001 W

F2 - Processing parameters  
SI 65536  
SF 100.5121884 MHz  
WWSM EM  
SSB 0  
LB 1.00 Hz  
CB 0  
PC 1.40



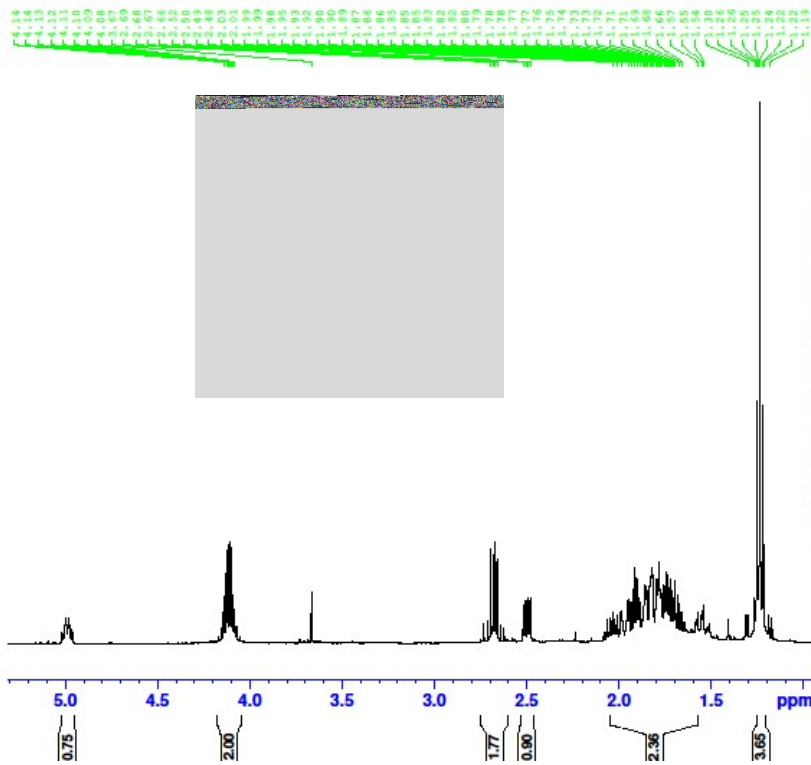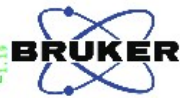

Current Data Parameters  
 NAME ARF196C  
 EXPNO 20  
 PROCNO 1

F2 - Acquisition Parameters  
 Date\_ 20190501  
 Time 15.49 h  
 INSTRUM KU\_Avance\_1ii\_400  
 PROBHD Z108618\_0245 ( )  
 PULPROG zg30  
 TD 65536  
 SOLVENT cdcl3  
 NS 16  
 DS 2  
 SWH 8223.685 Hz  
 FIDRES 0.250967 Hz  
 AQ 3.9845889 sec  
 RG 128  
 DW 60.800 usec  
 DE 16.30 usec  
 TE 294.5 K  
 D1 1.00000000 sec  
 TD0 1  
 SFO1 399.7324685 MHz  
 NUC1 1H  
 P1 12.75 usec  
 PLW1 16.47699928 W

F2 - Processing parameters  
 SI 65536  
 SF 399.7300088 MHz  
 WDW EM  
 SSB 0  
 LB 0.20 Hz  
 GB 0  
 PC 1.00

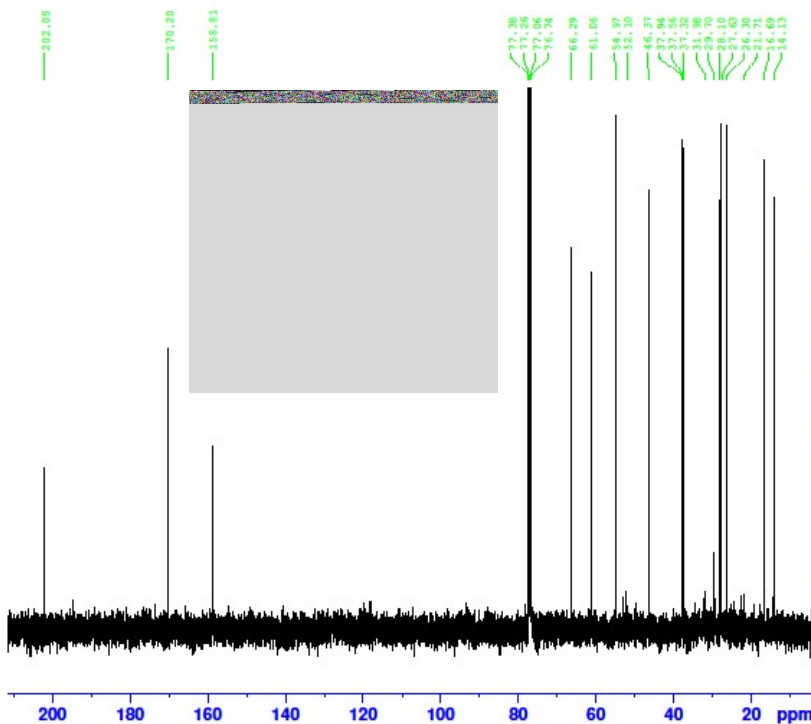

Current Data Parameters  
 NAME ARF196C  
 EXPNO 21  
 PROCNO 1

F2 - Acquisition Parameters  
 Date\_ 20190501  
 Time 16.05 h  
 INSTRUM KU\_Avance\_1ii\_400  
 PROBHD Z108618\_0245 ( )  
 PULPROG zgpg30  
 TD 65536  
 SOLVENT cdcl3  
 NS 256  
 DS 4  
 SWH 24038.461 Hz  
 FIDRES 0.733596 Hz  
 AQ 1.3631488 sec  
 RG 2050  
 DW 20.800 usec  
 DE 22.74 usec  
 TE 295.5 K  
 D1 2.00000000 sec  
 D11 0.03000000 sec  
 TD0 1  
 SFO1 100.5222401 MHz  
 NUC1 13C  
 P1 9.20 usec  
 PLW1 49.50000000 W  
 SFO2 399.7315989 MHz  
 NUC2 1H  
 CPDPRG2 waltz16  
 PCPD2 90.00 usec  
 PLW2 16.47699928 W  
 PLW12 0.33068001 W  
 PLW13 0.26785001 W

F2 - Processing parameters  
 SI 65536  
 SF 100.5121884 MHz  
 WDW EM  
 SSB 0  
 LB 1.00 Hz  
 GB 0  
 PC 1.40



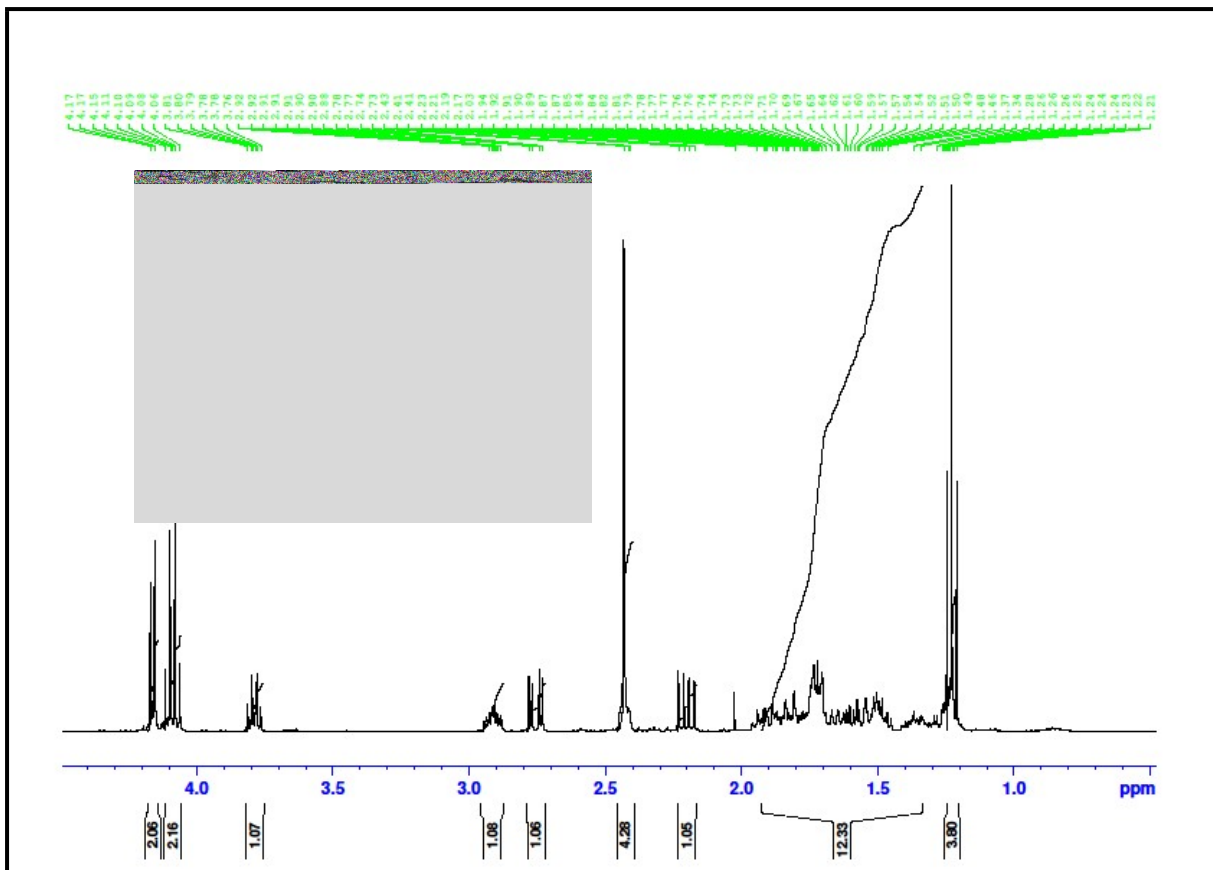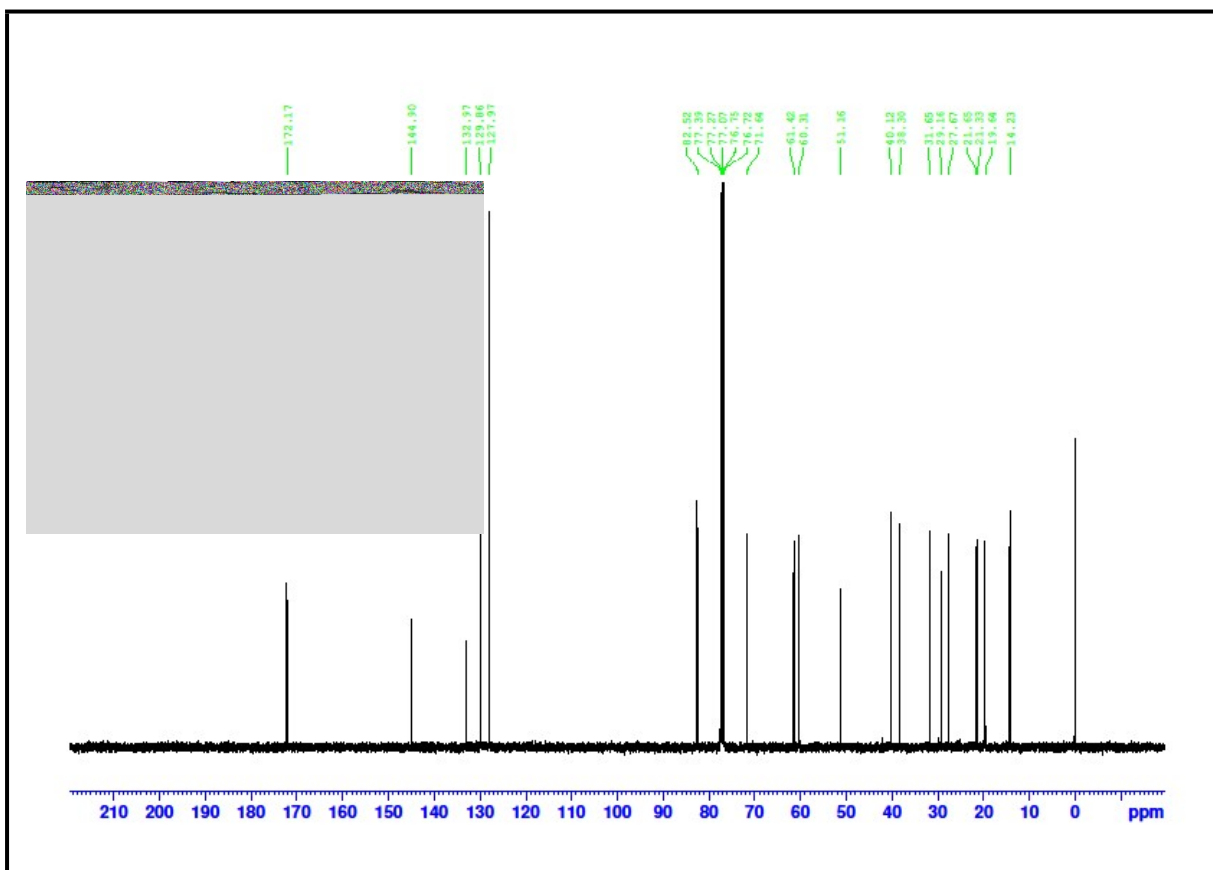



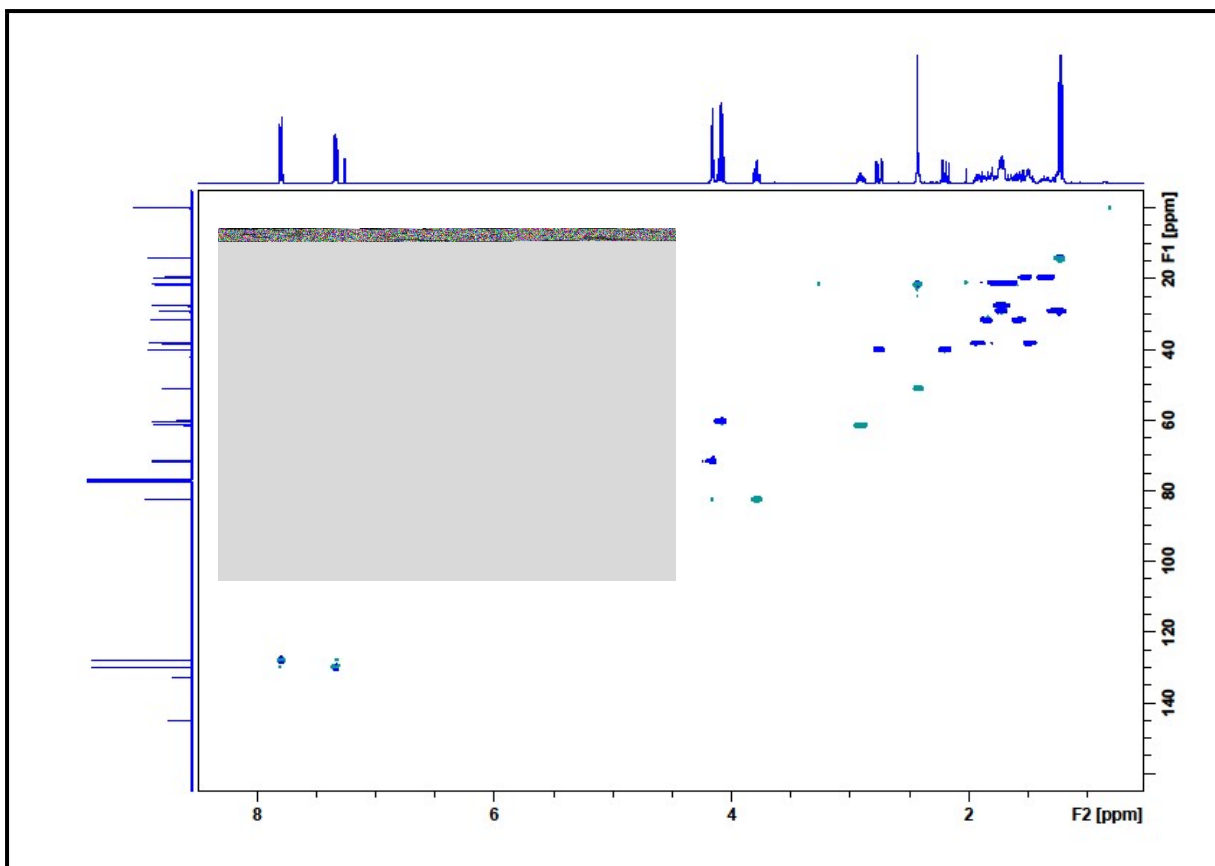

ARF267 Pure

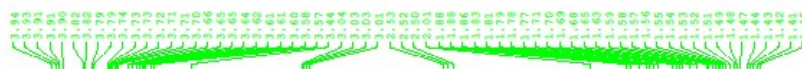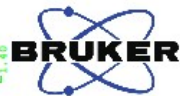

Current Data Parameters  
NAME ARF267  
EXNO 10  
PROCNO 1

F2 - Acquisition Parameters  
Date\_ 20200127  
Time 14.11 h  
INSTRUM KU\_Avance III\_400  
PROBHD Z108618\_0245 ( )  
PULPROG zg30  
TD 65536  
SOLVENT cdcl3  
NS 16  
DS 2  
SWH 8223.685 Hz  
FIDRES 0.250967 Hz  
AQ 3.9845889 sec  
RG 101  
DW 60.800 usec  
DE 16.80 usec  
TE 298.2 K  
D1 1.00000000 sec  
TDO 1  
SFO1 399.7324685 MHz  
NUC1 1H  
P0 4.25 usec  
P1 12.75 usec  
PLW1 16.47699928 W

F2 - Processing parameters  
SI 65536  
SF 399.7300100 MHz  
WDW EM  
SSB 0  
LB 0.20 Hz  
GB 0  
PC 1.00

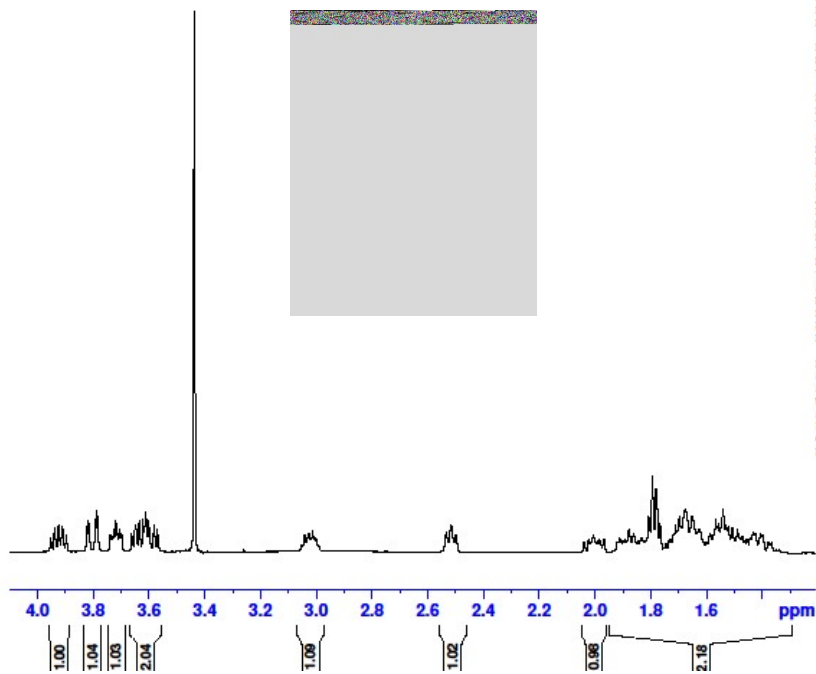

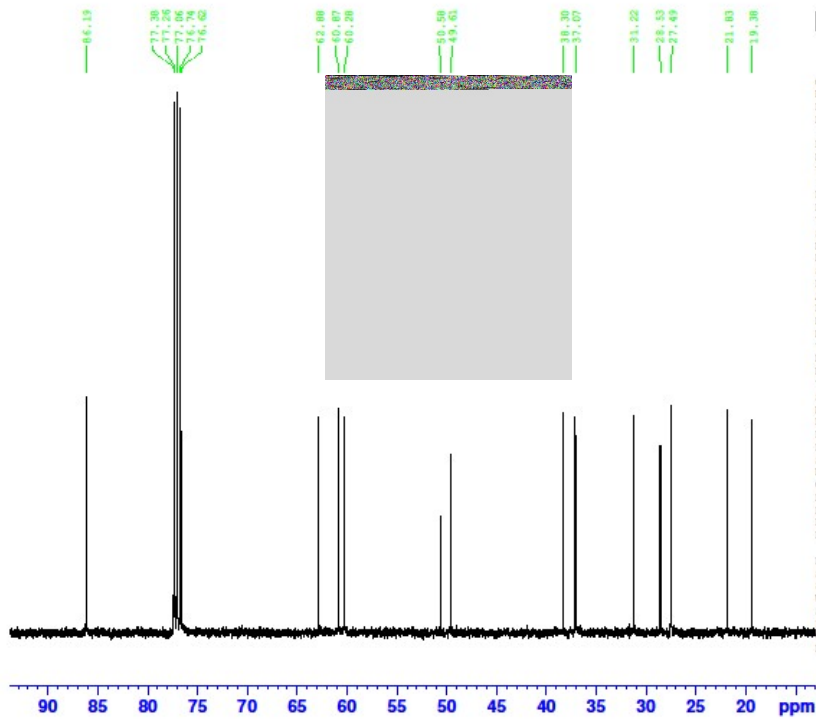

```

Current Data Parameters
NAME      ARF267
EXPNO    11
PROCNO   1

F2 - Acquisition Parameters
Date_    20200127
Time     17.49 h
INSTRUM  KU_Avance III_400
PROBHD   Z108618_0245 (
PULPROG  zgpg30
TD        65536
SOLVENT  cdcl3
NS        256
DS        4
SWH       24038.461 Hz
FIDRES    0.733596 Hz
AQ        1.3631488 sec
RG        2050
DW        20.800 usec
DE        23.11 usec
TE        298.2 K
D1        2.00000000 sec
D11       0.03000000 sec
TD0       1
SFO1      100.5222401 MHz
NUC1      13C
P0        3.07 usec
P1        9.20 usec
PLW1      49.50000000 W
SFO2      399.7315989 MHz
NUC2      1H
CPDPRG2   waltz16
PCPD2     90.00 usec
PLW2      16.47699928 W
PLW12     0.33068001 W
PLW13     0.16632999 W

F2 - Processing parameters
SI        65536
SF        100.5121884 MHz
WDW       EM
SSB       0
LB        1.00 Hz
GB        0
PC        1.40
  
```

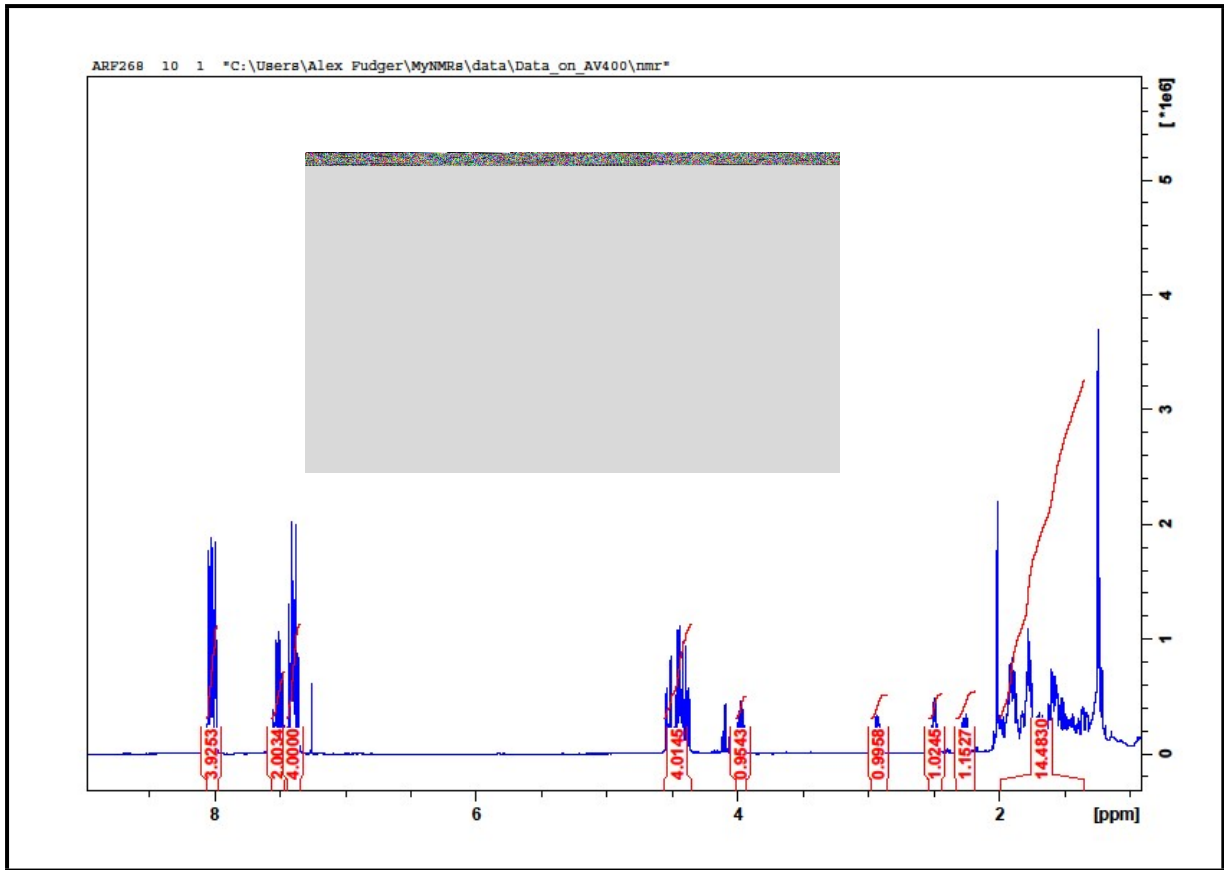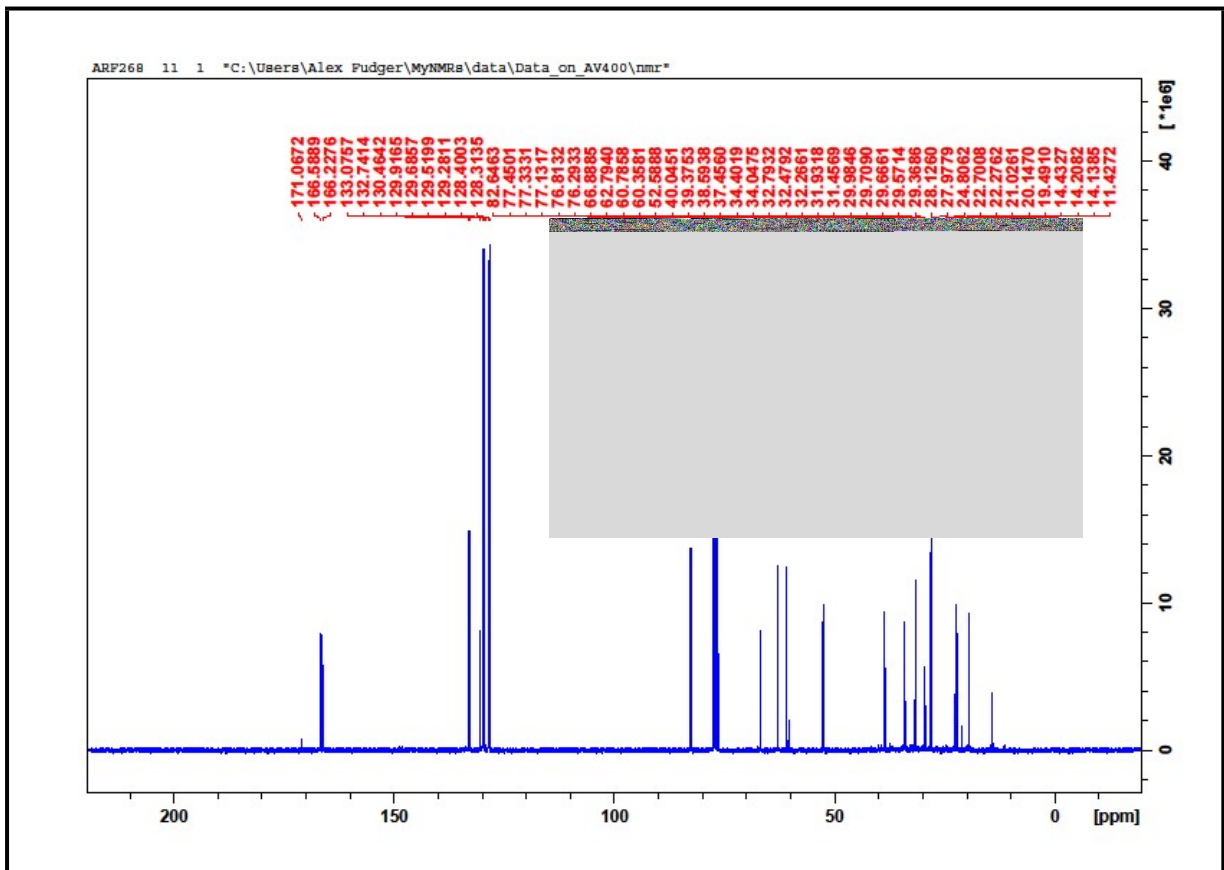



COSY NMR spectrum for compound **17a**

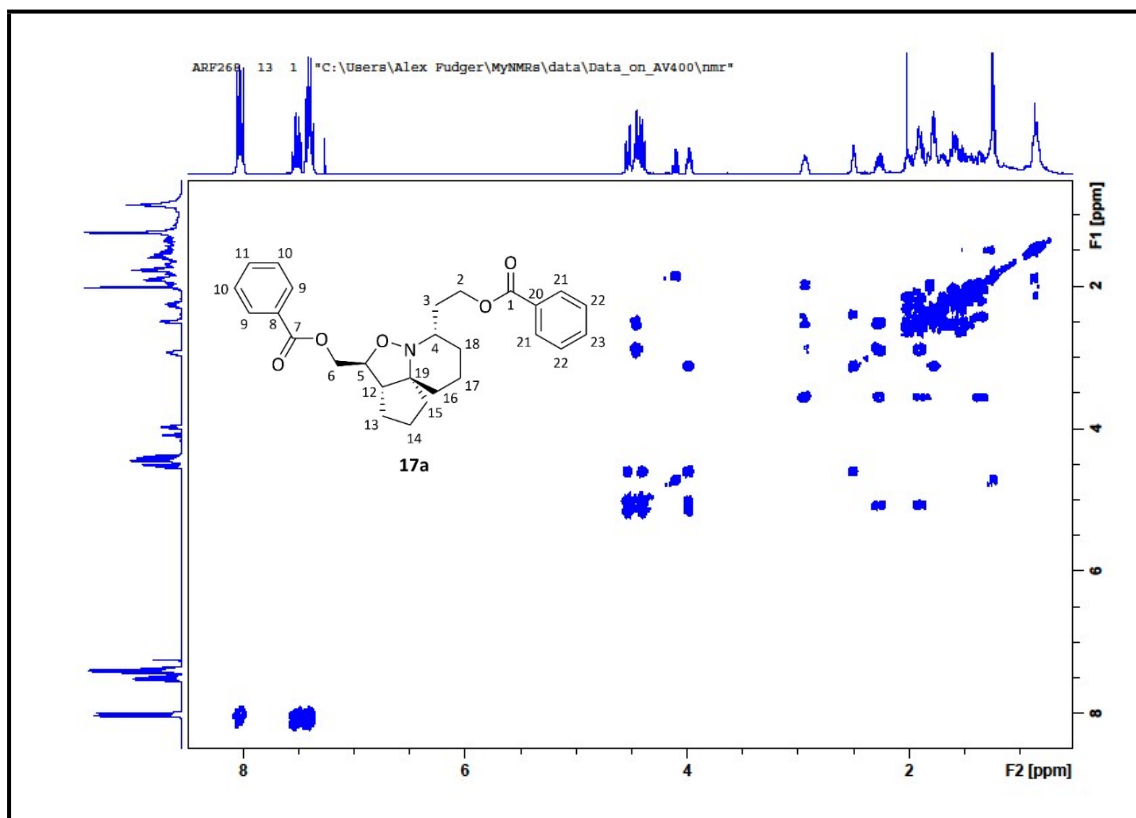

HSQC NMR spectrum for compound **17a**

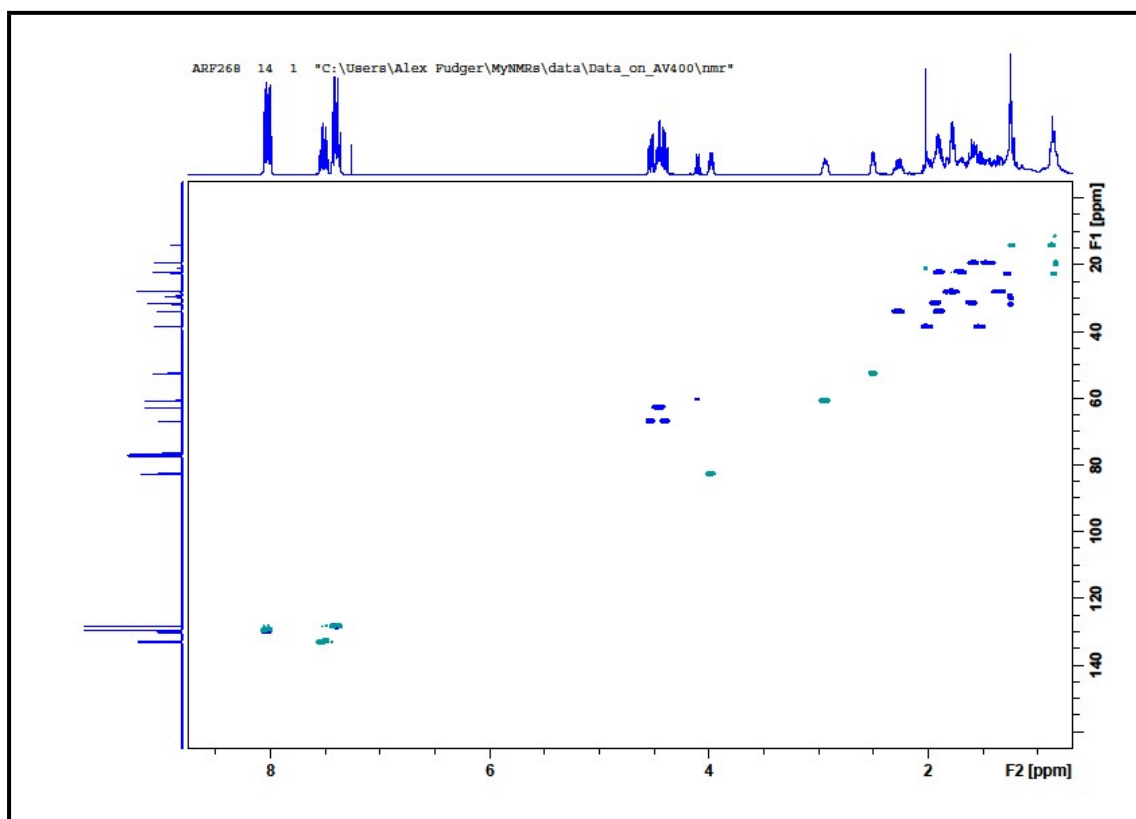

NOESY NMR spectrum for compound **17a**

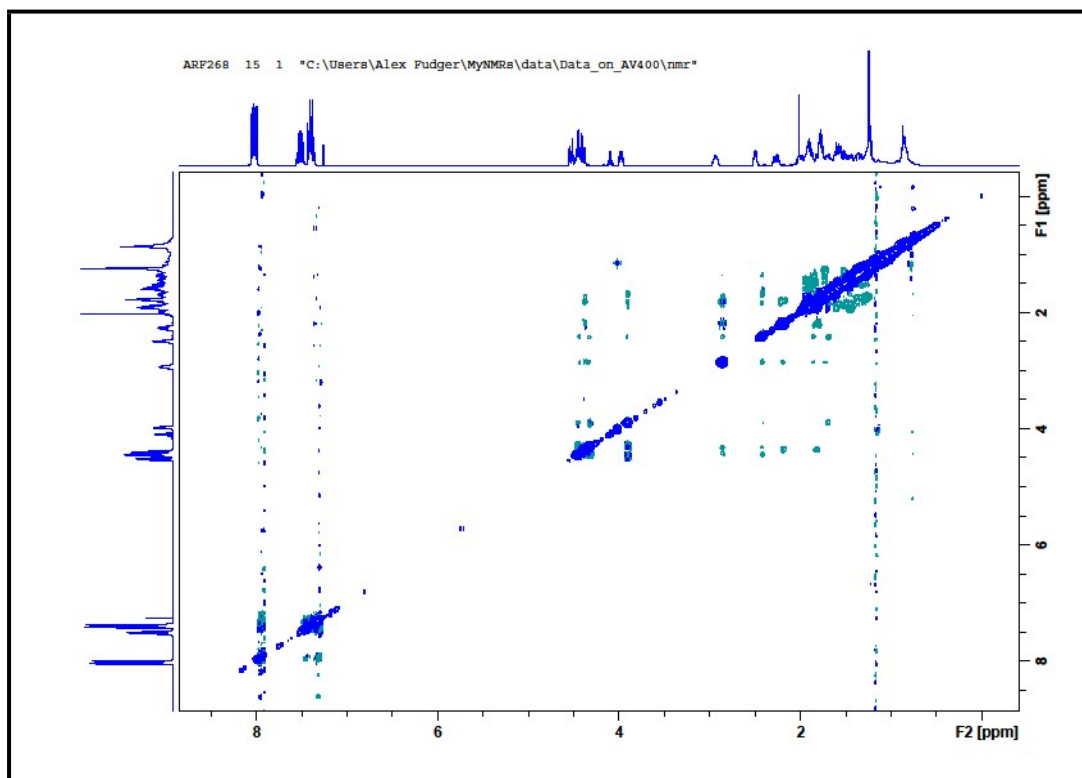

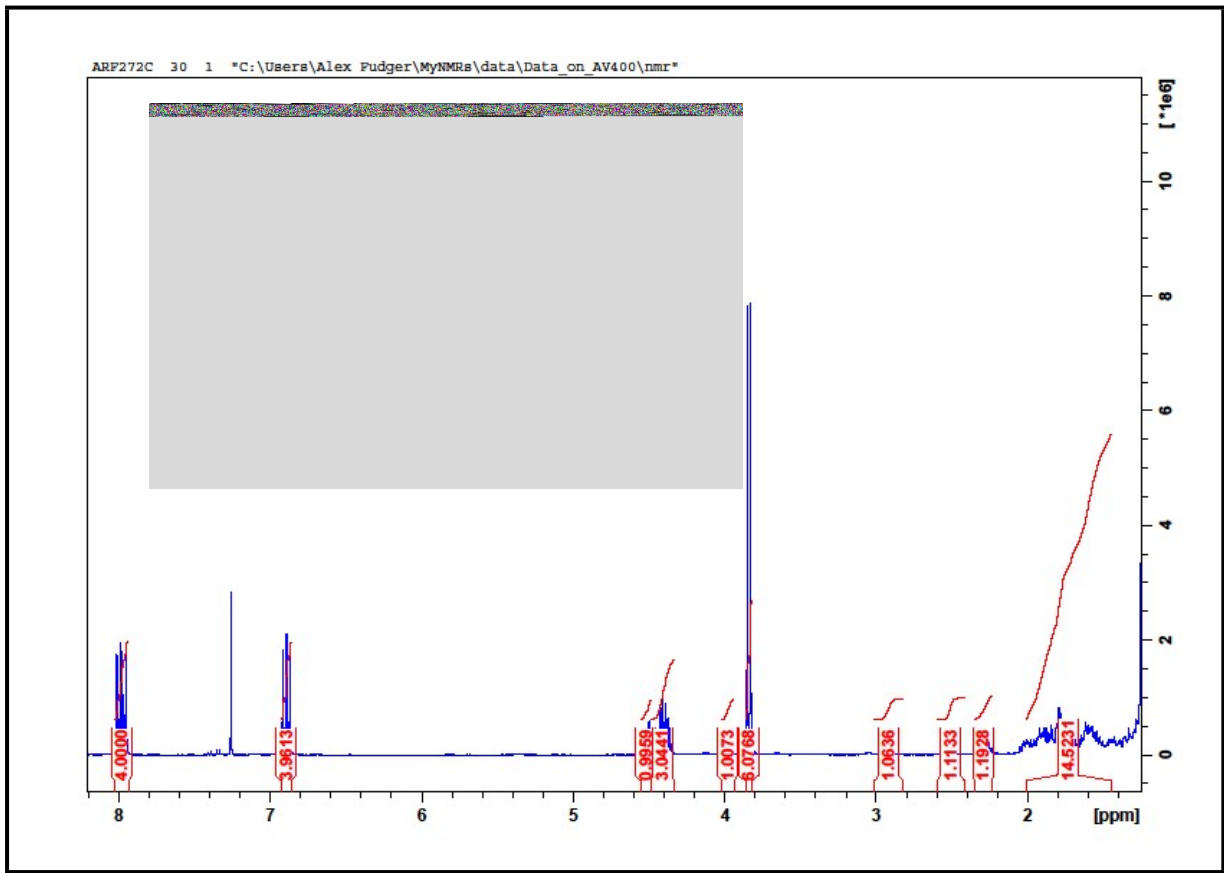

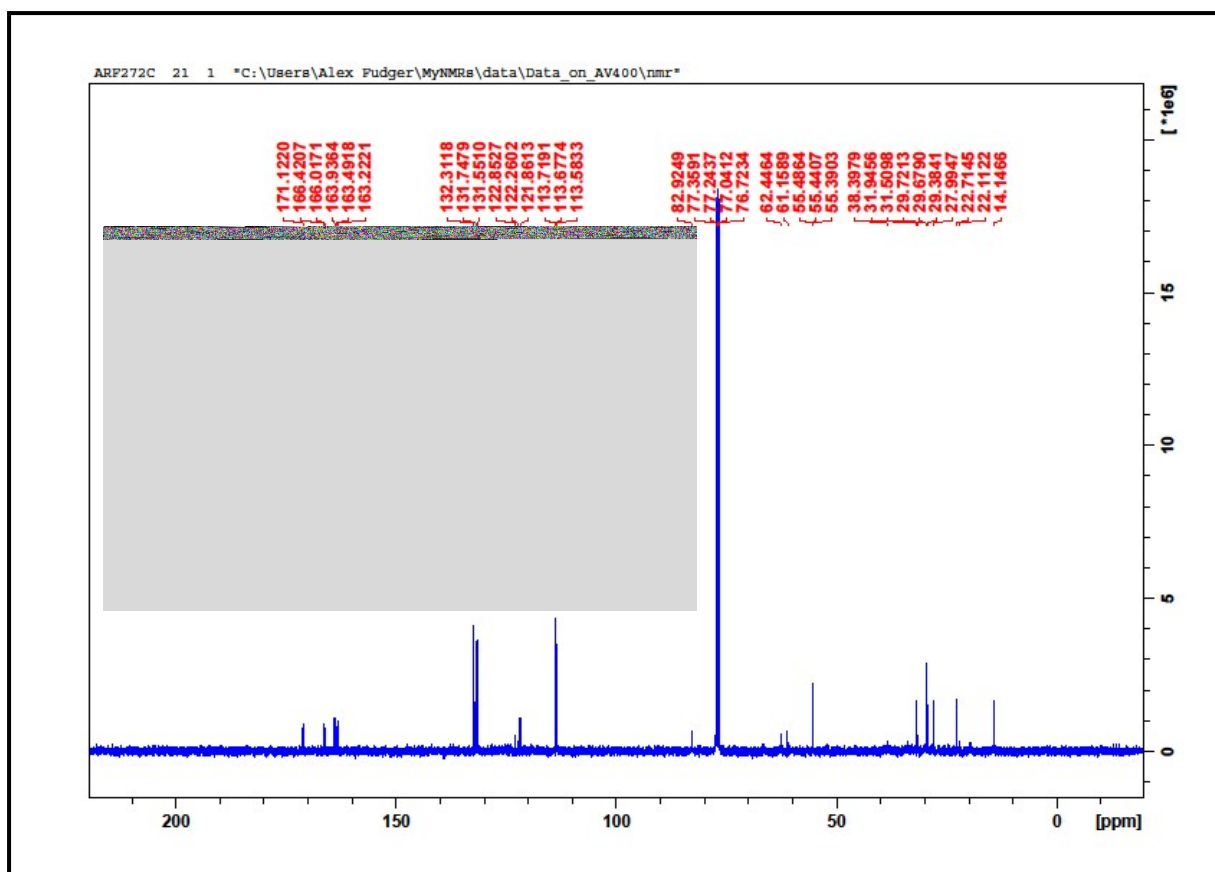

COSY NMR spectrum for compound **17b**

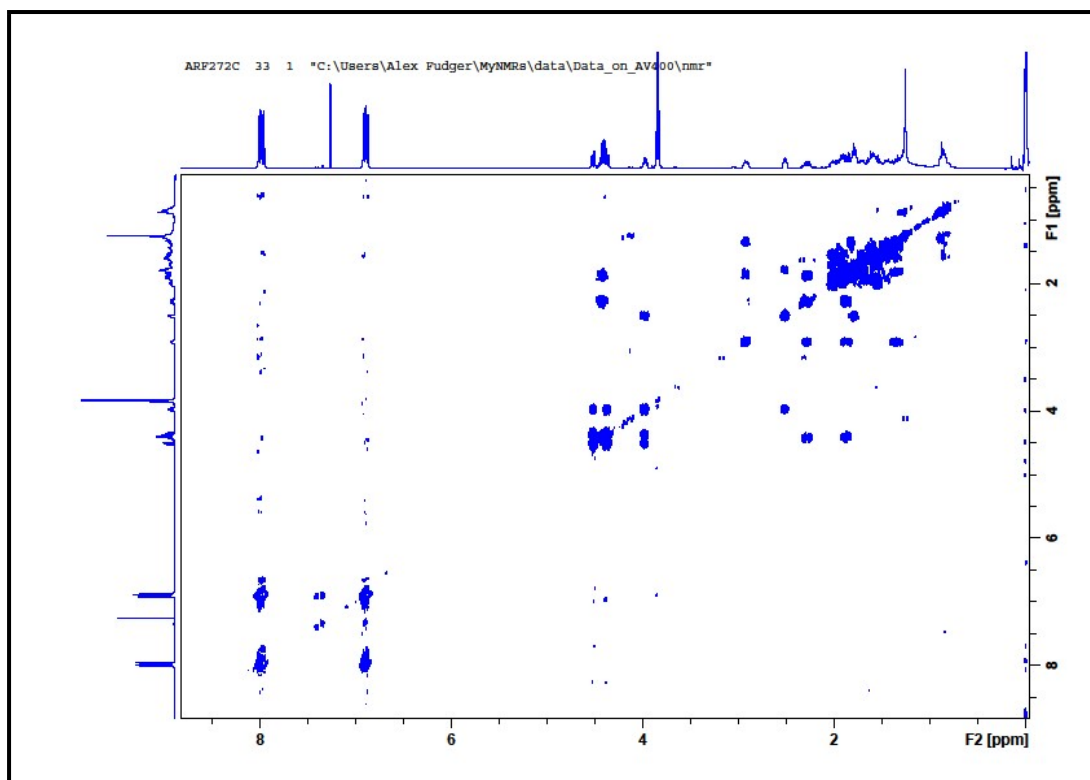

HSQC NMR spectrum for compound **17b**

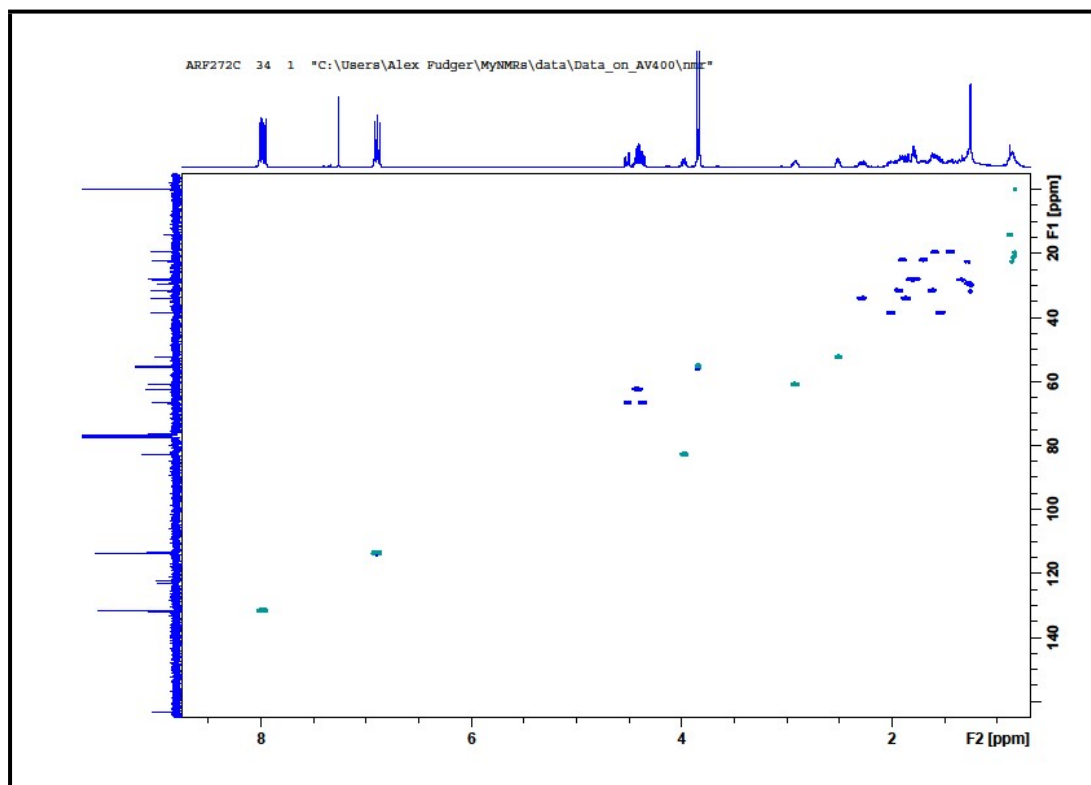

NOESY NMR spectrum for compound **17b**

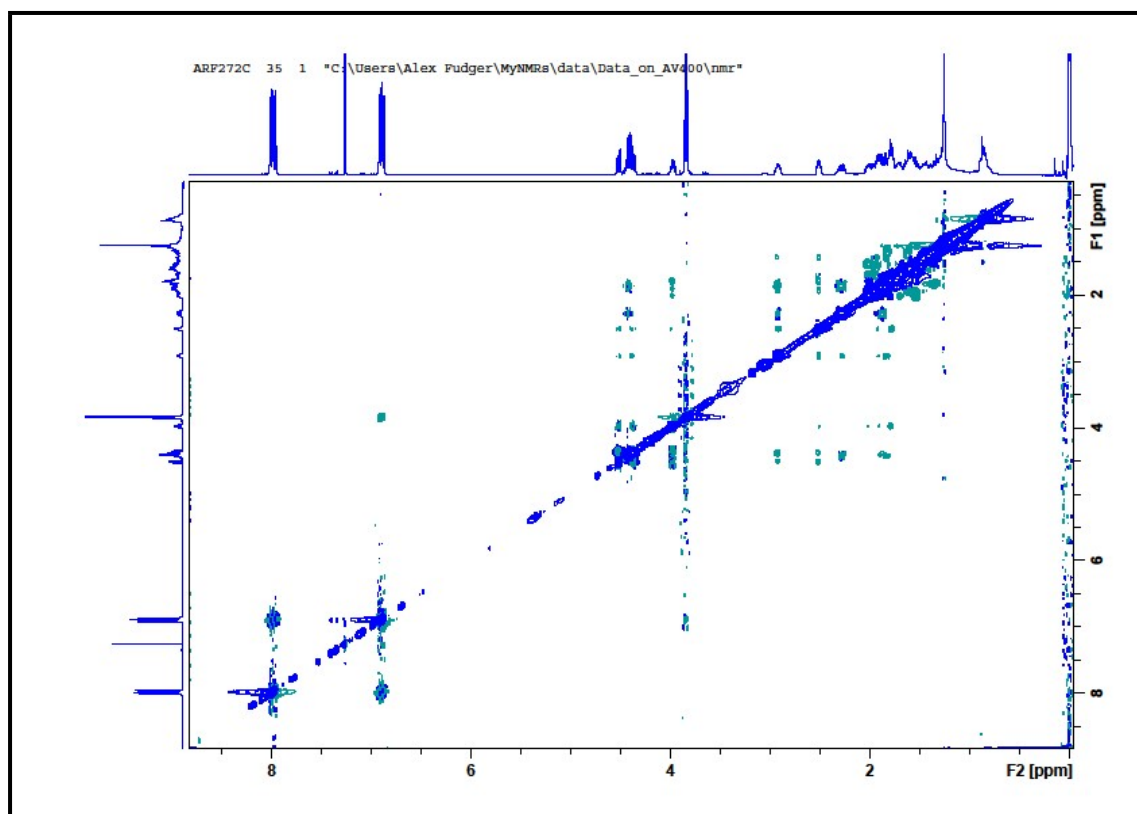



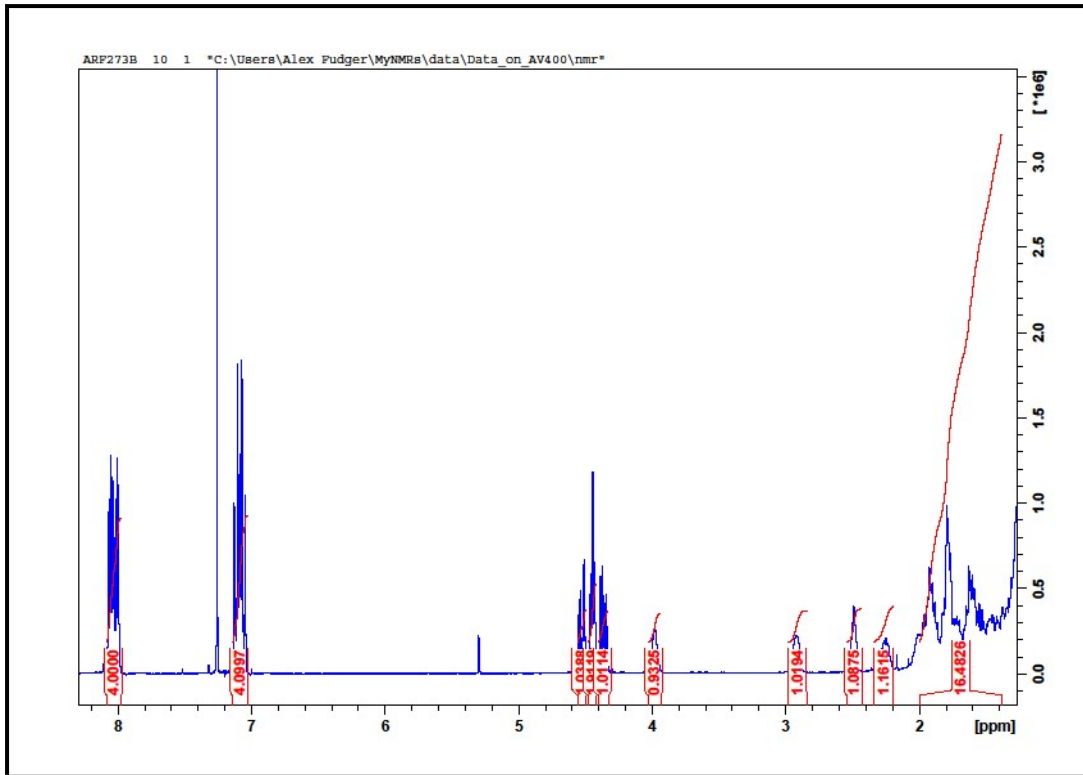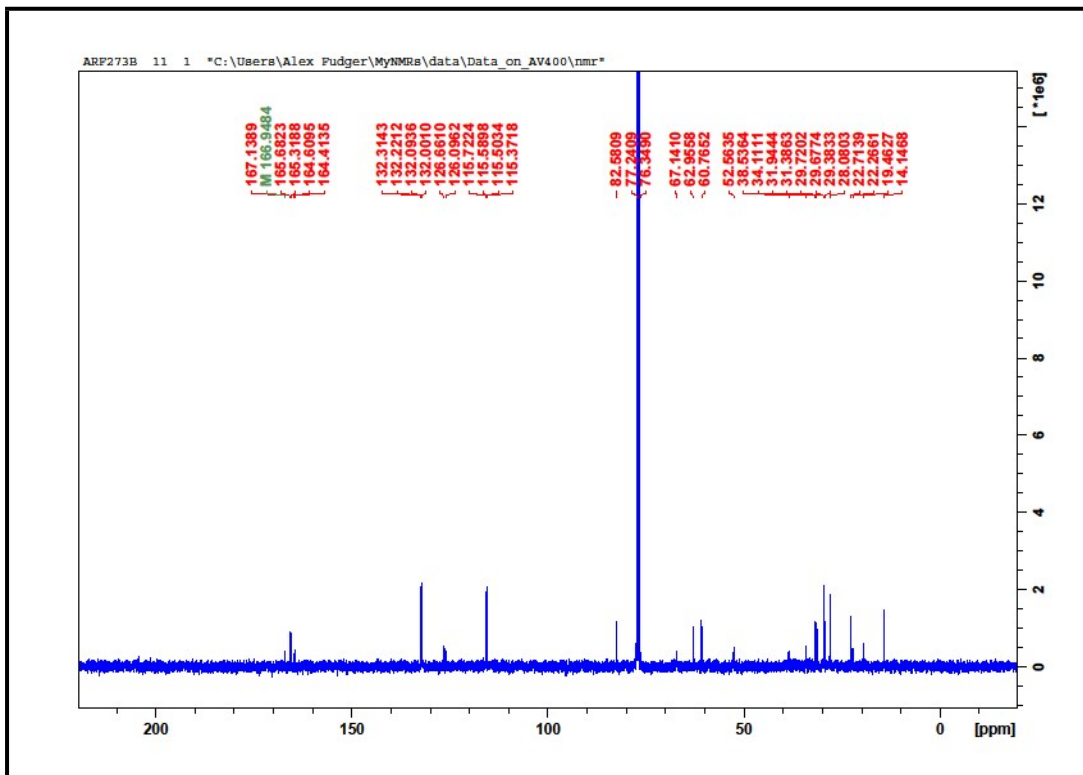

COSY NMR spectrum for compound **17c**

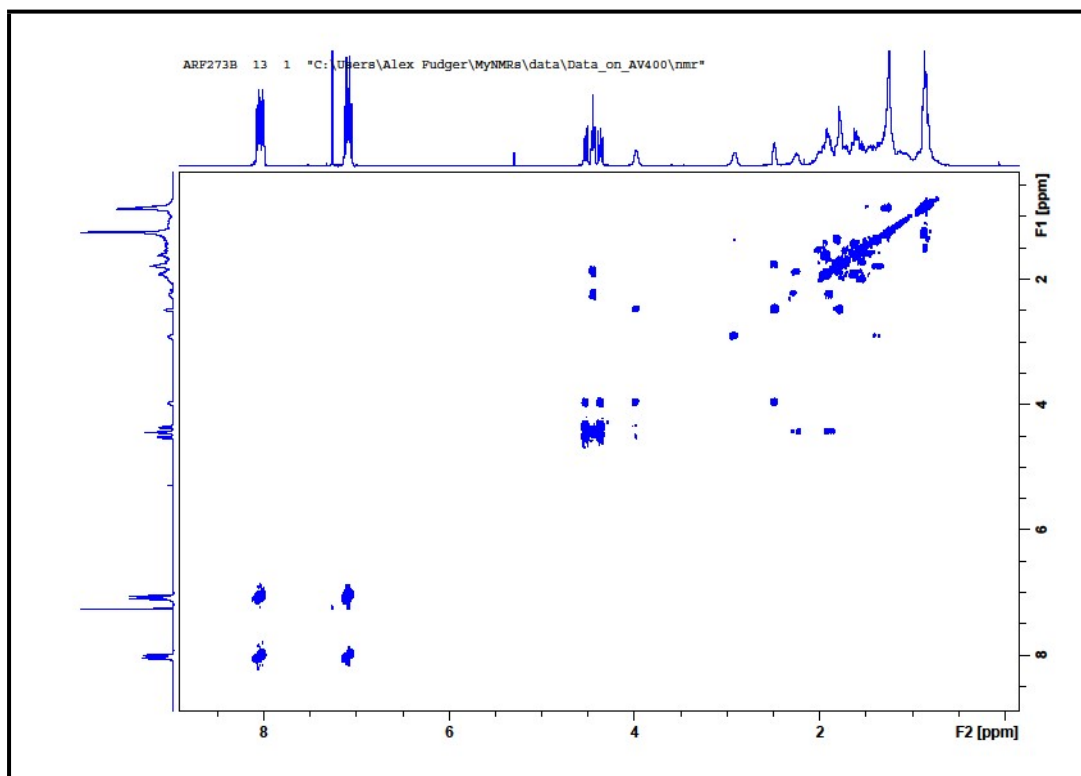

HSQC NMR spectrum for compound **17c**

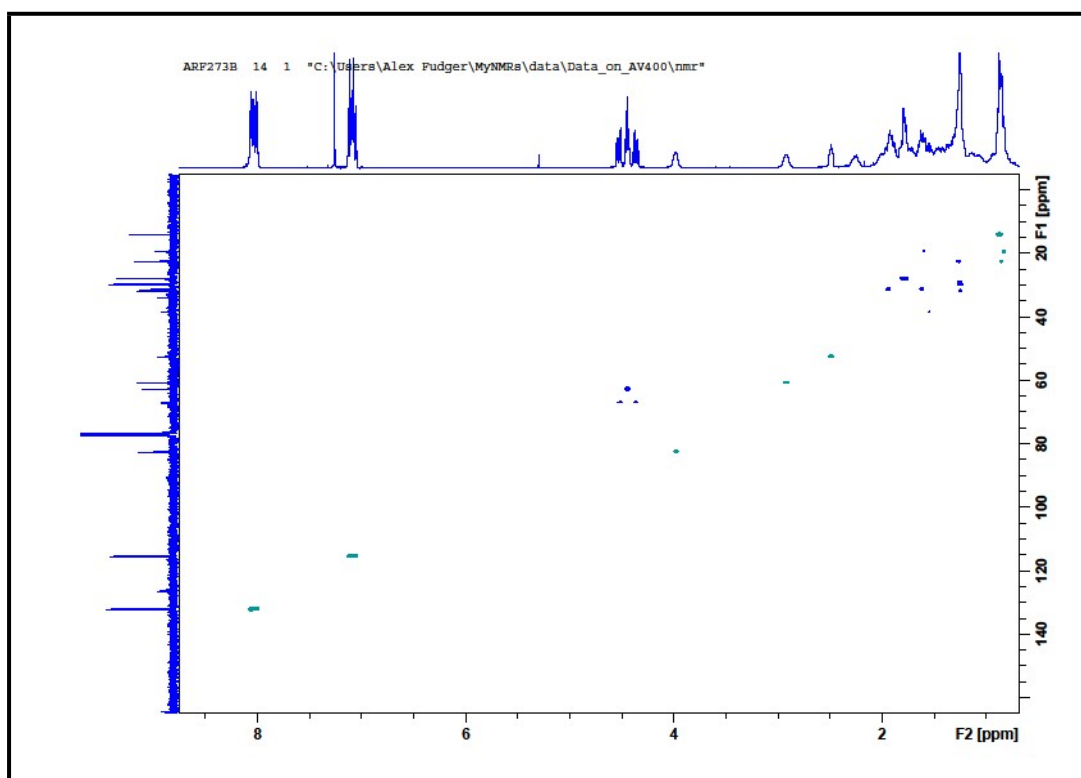



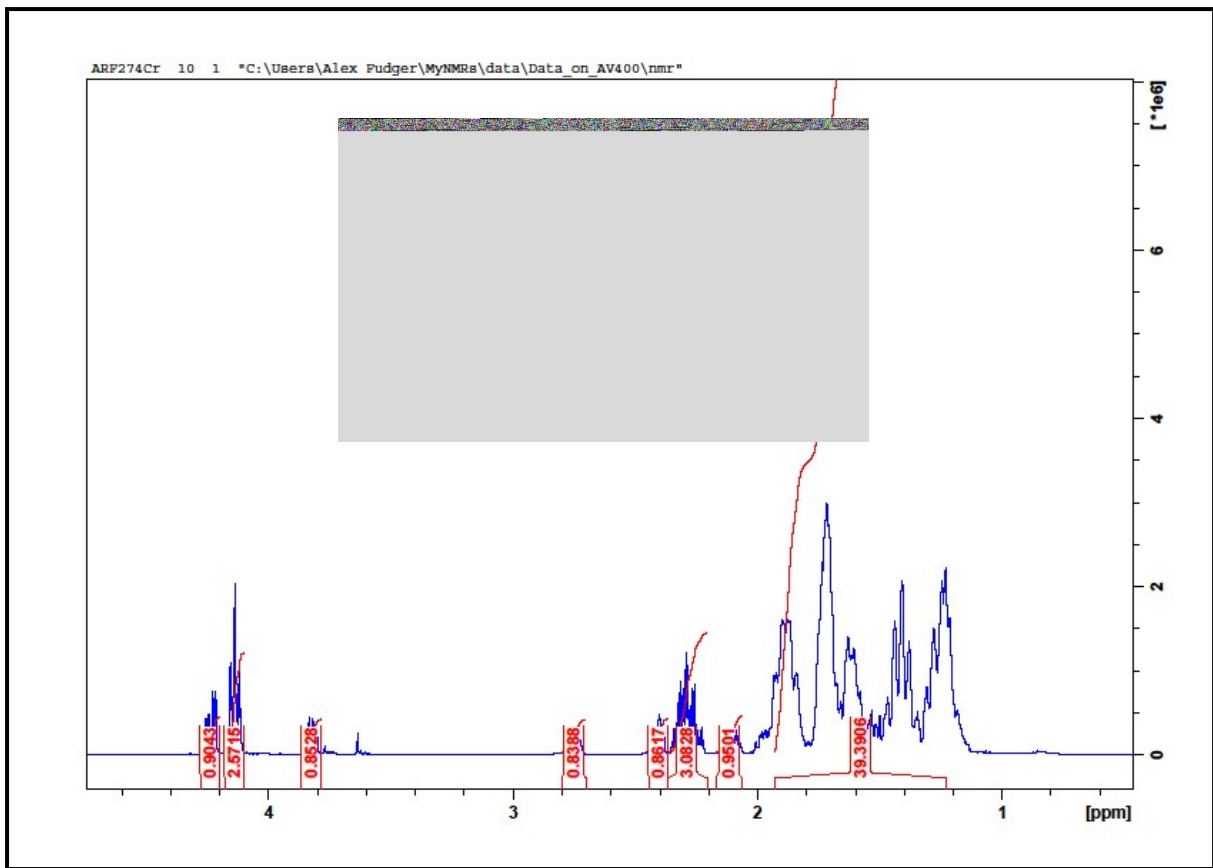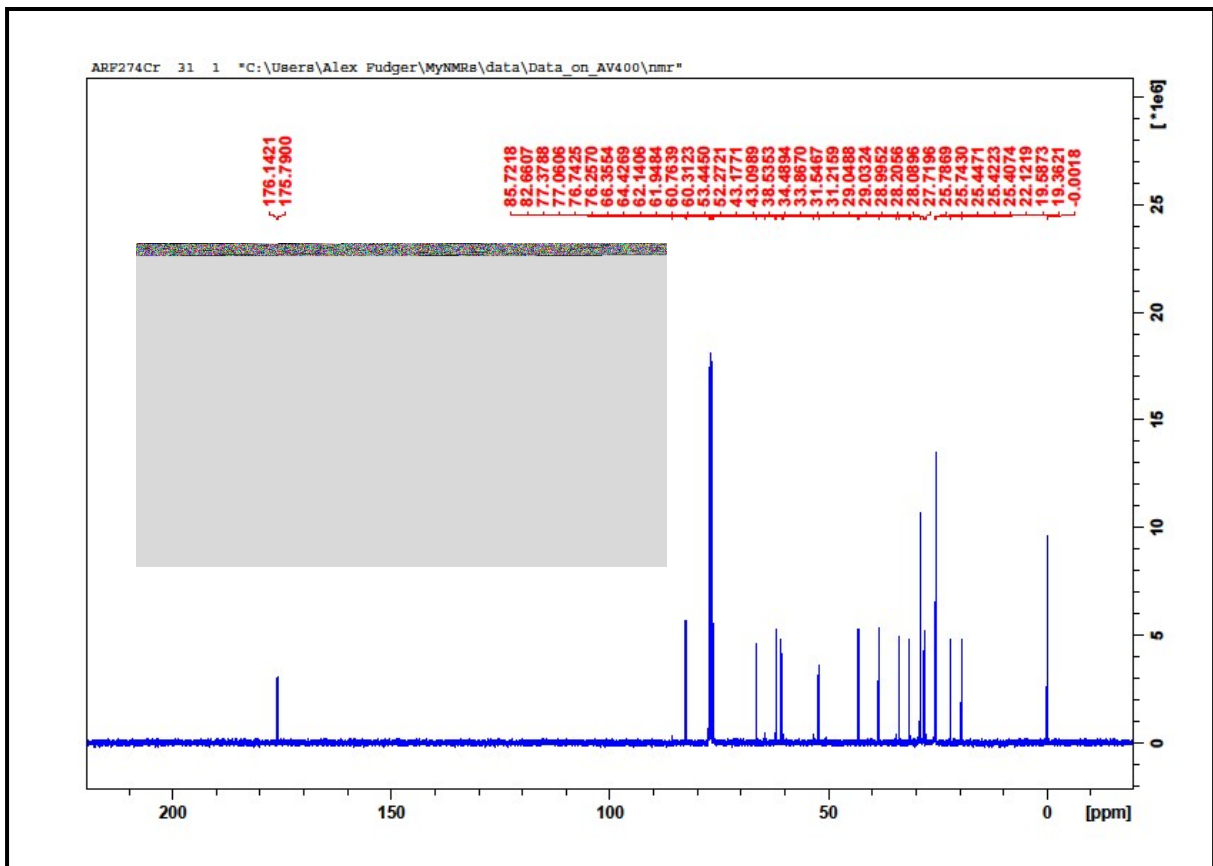



COSY NMR spectrum for compound **17d**

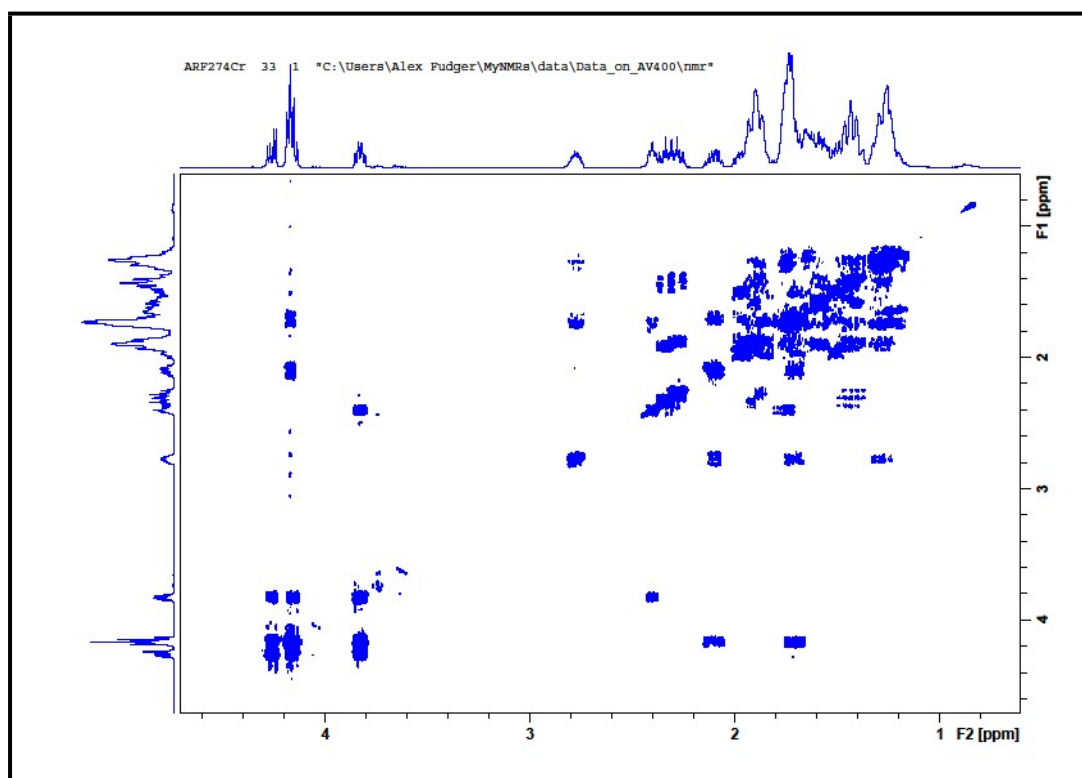

HSQC NMR spectrum for compound **17d**

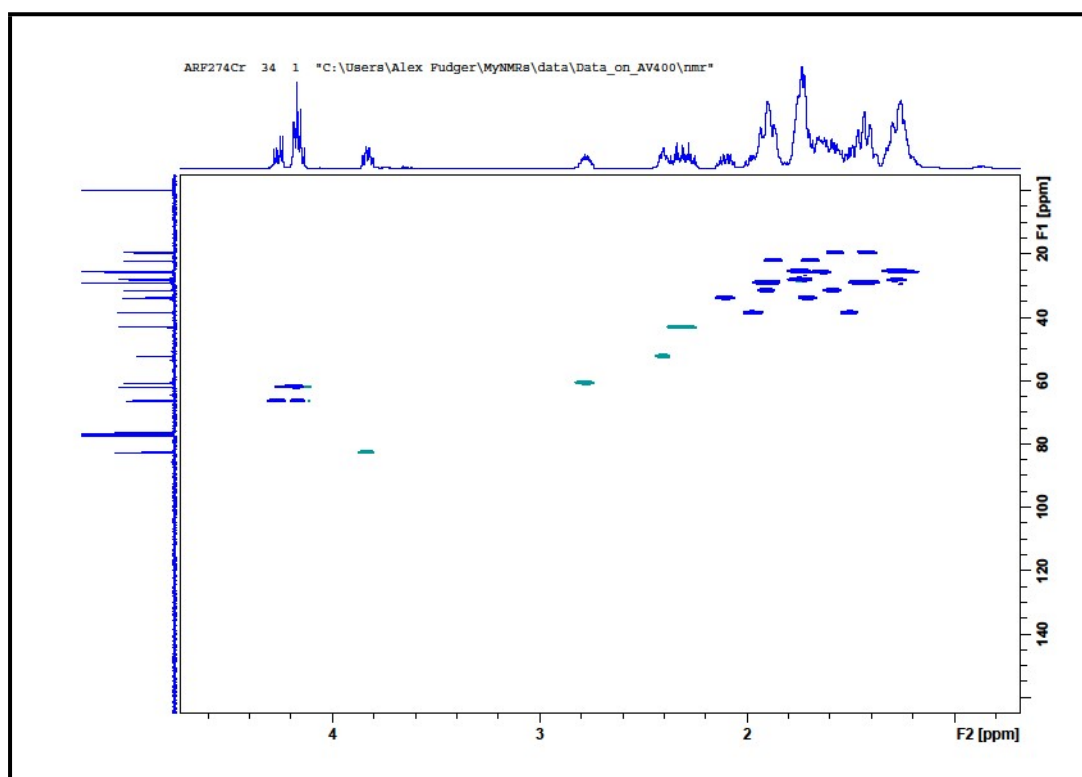

NOESY NMR spectrum for compound **17d**

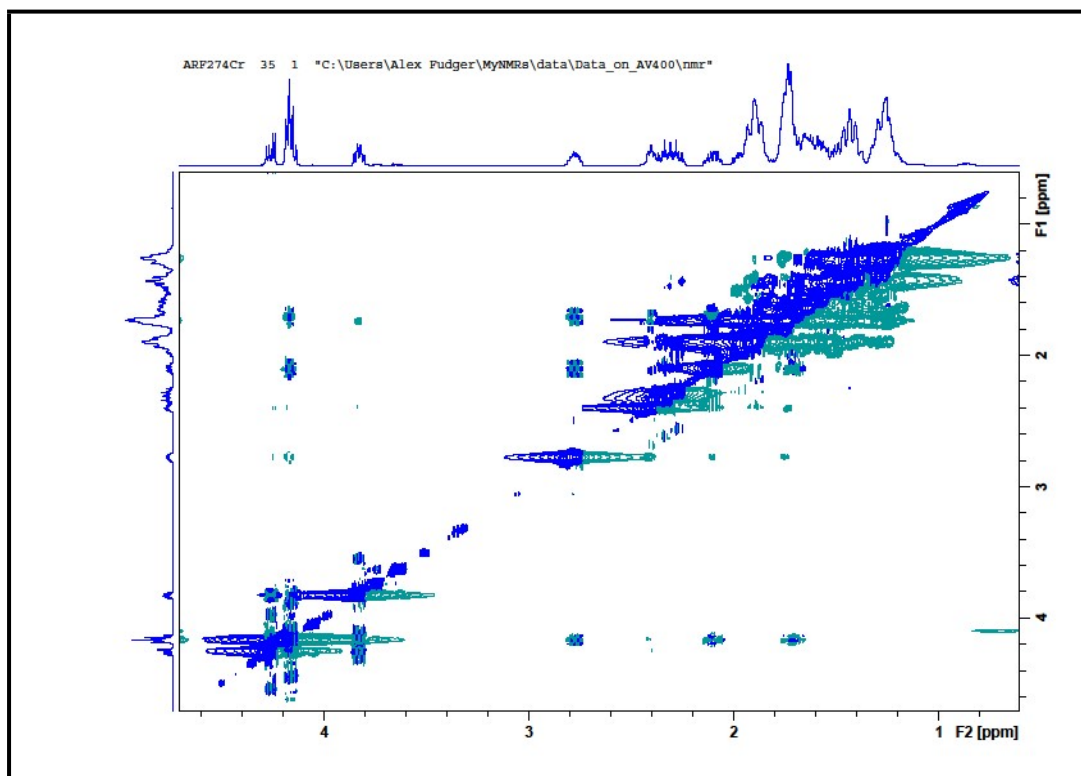

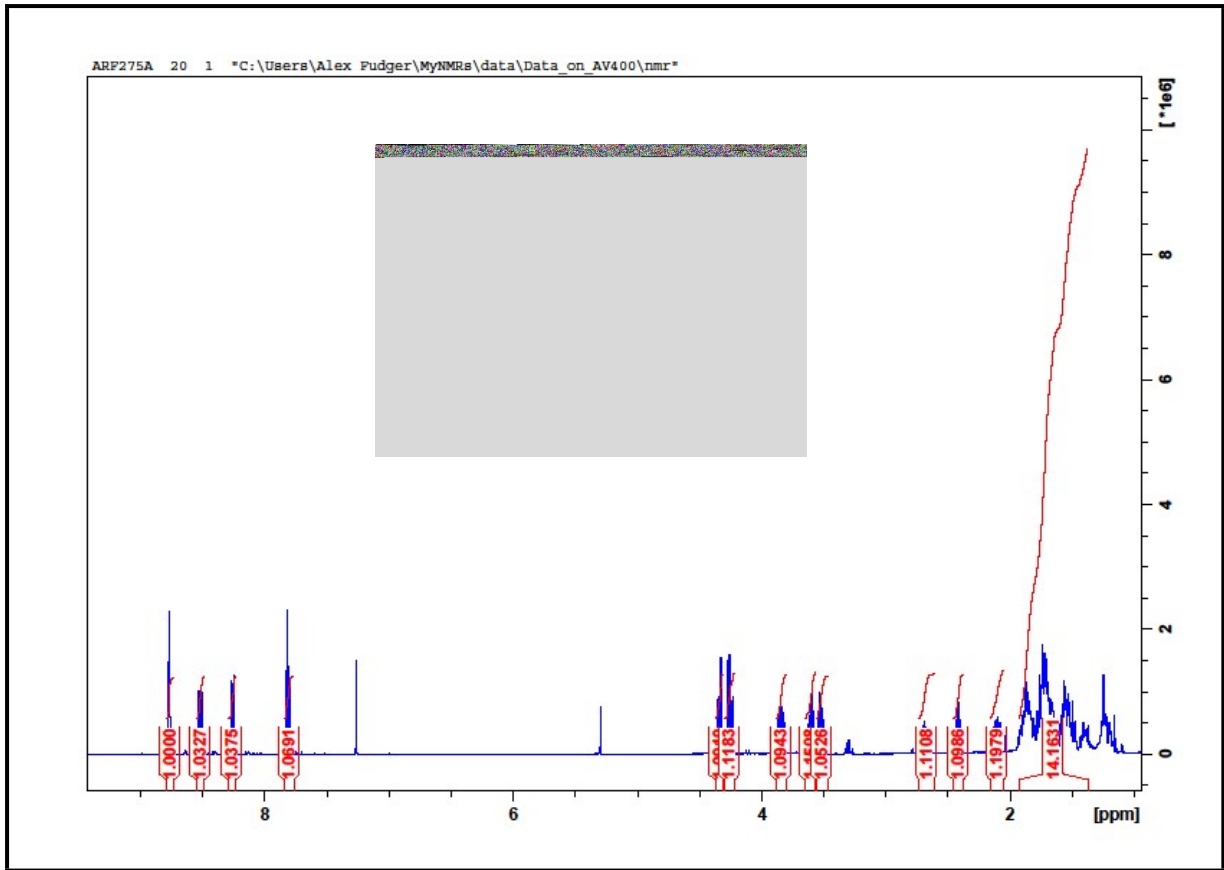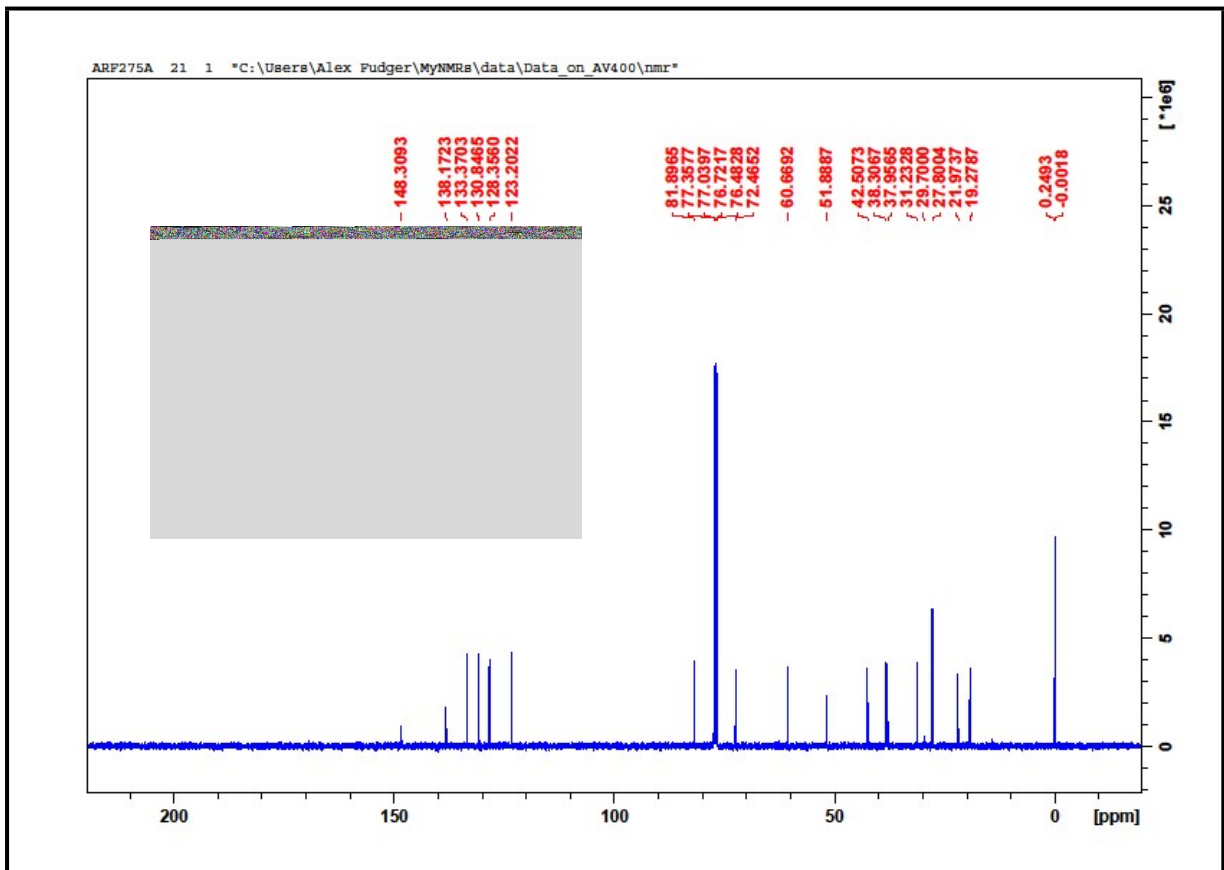



COSY NMR spectrum for compound **17e**

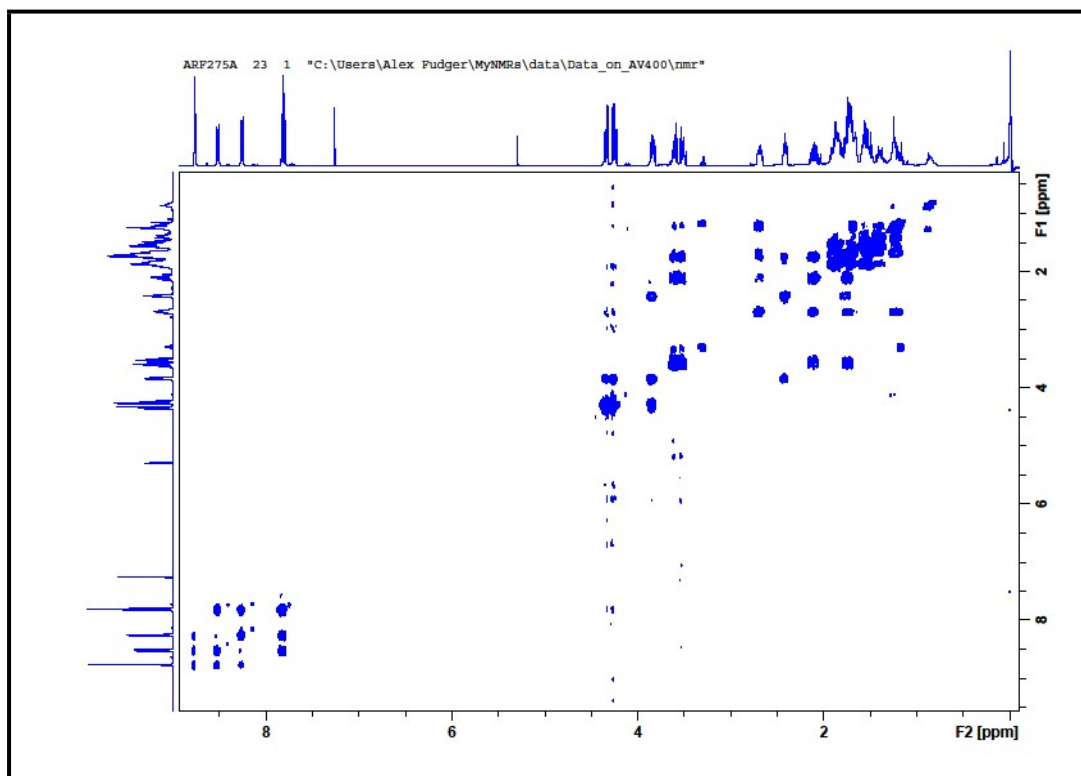

HSQC NMR spectrum for compound **17e**

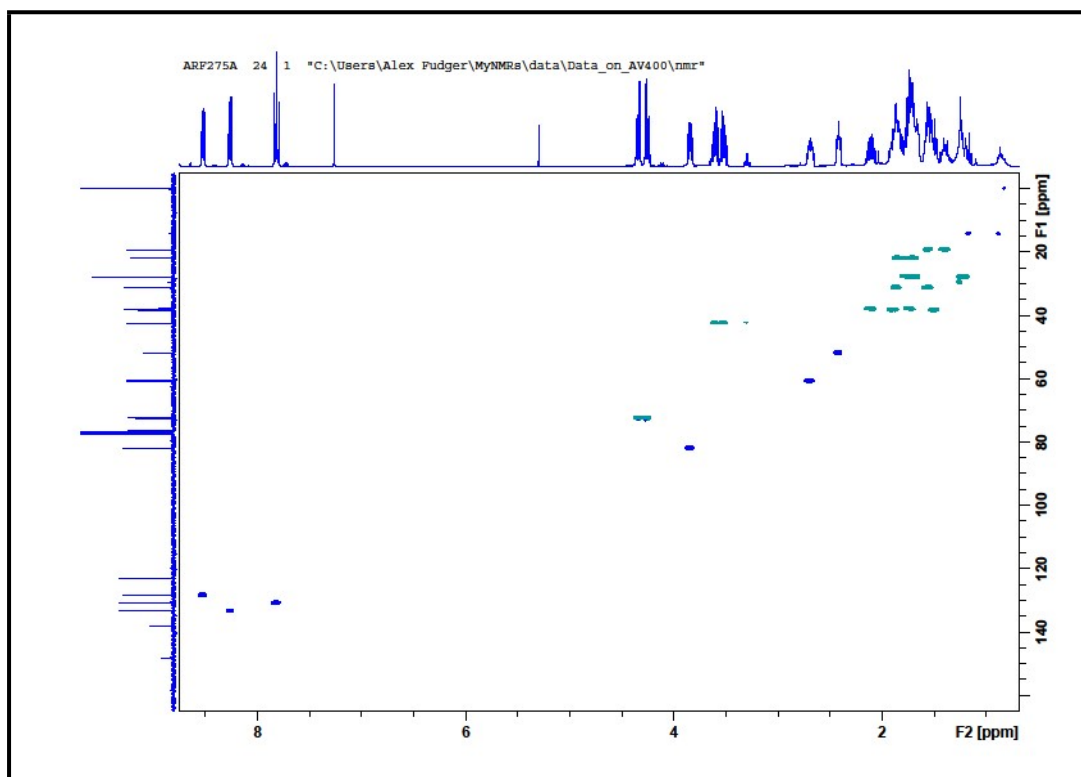

NOESY NMR spectrum for compound **17e**

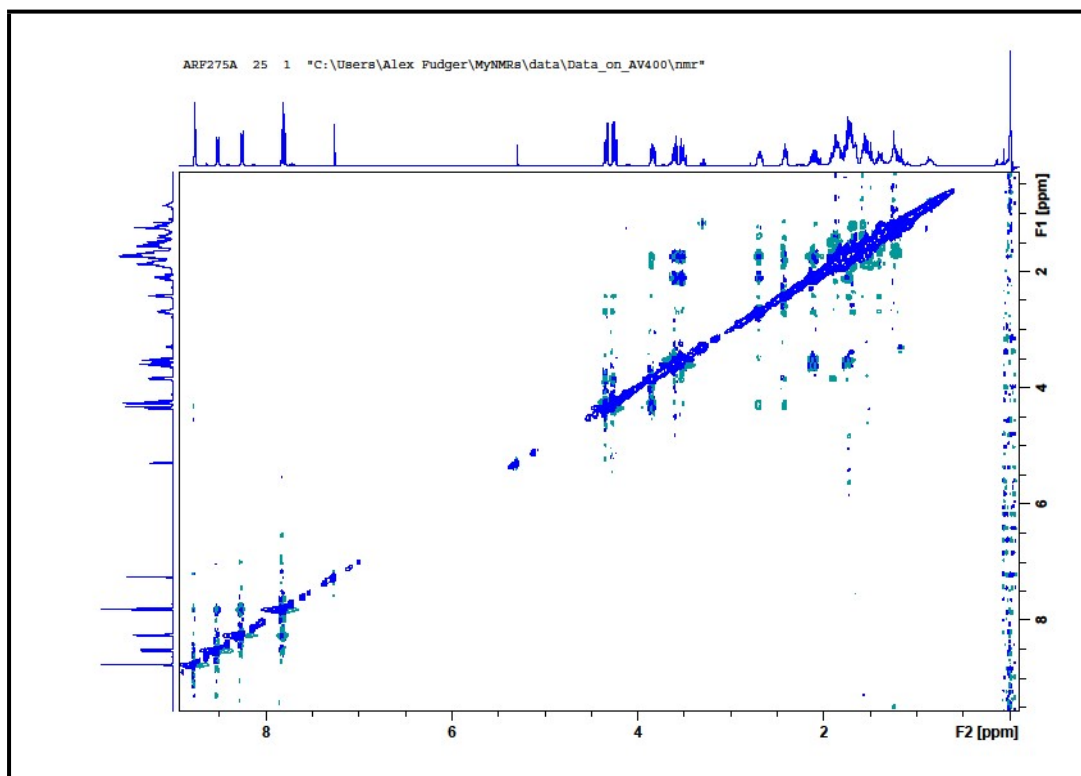



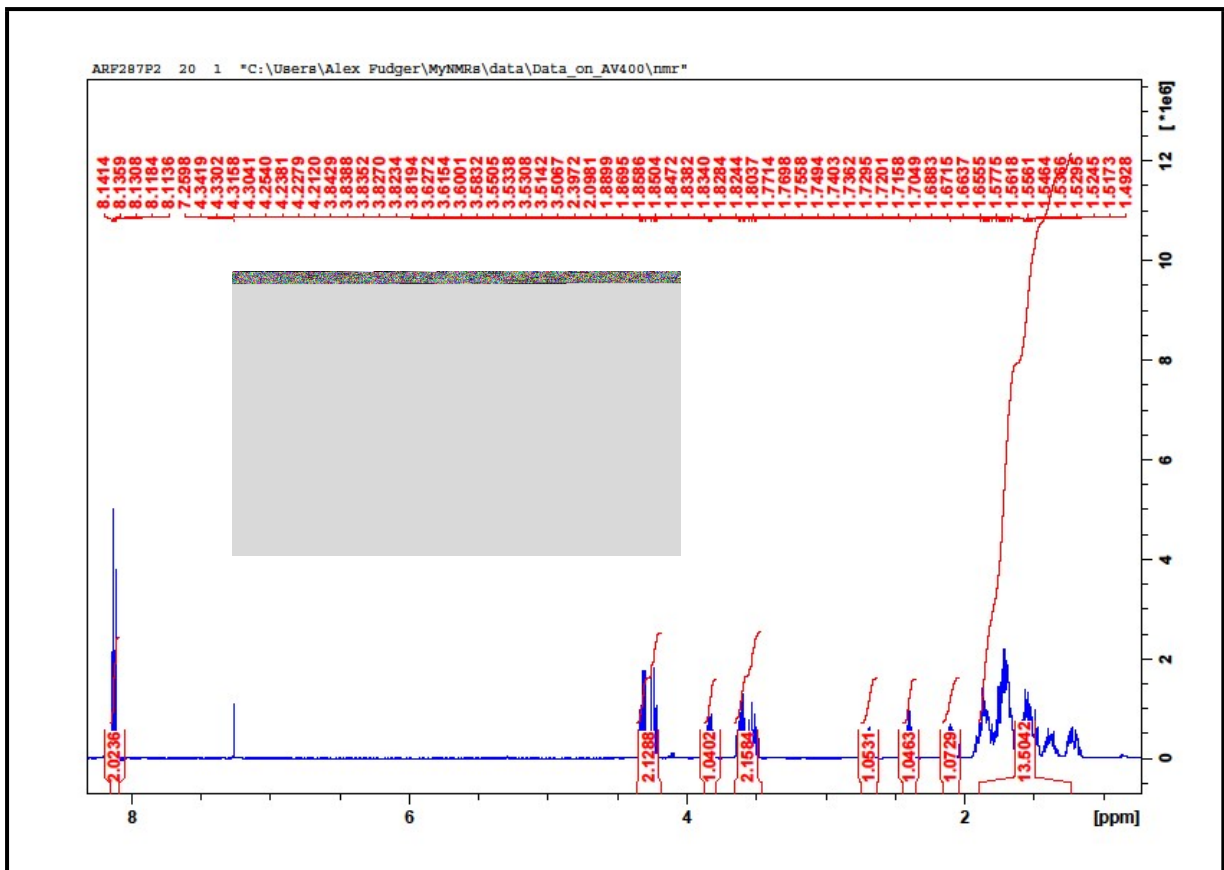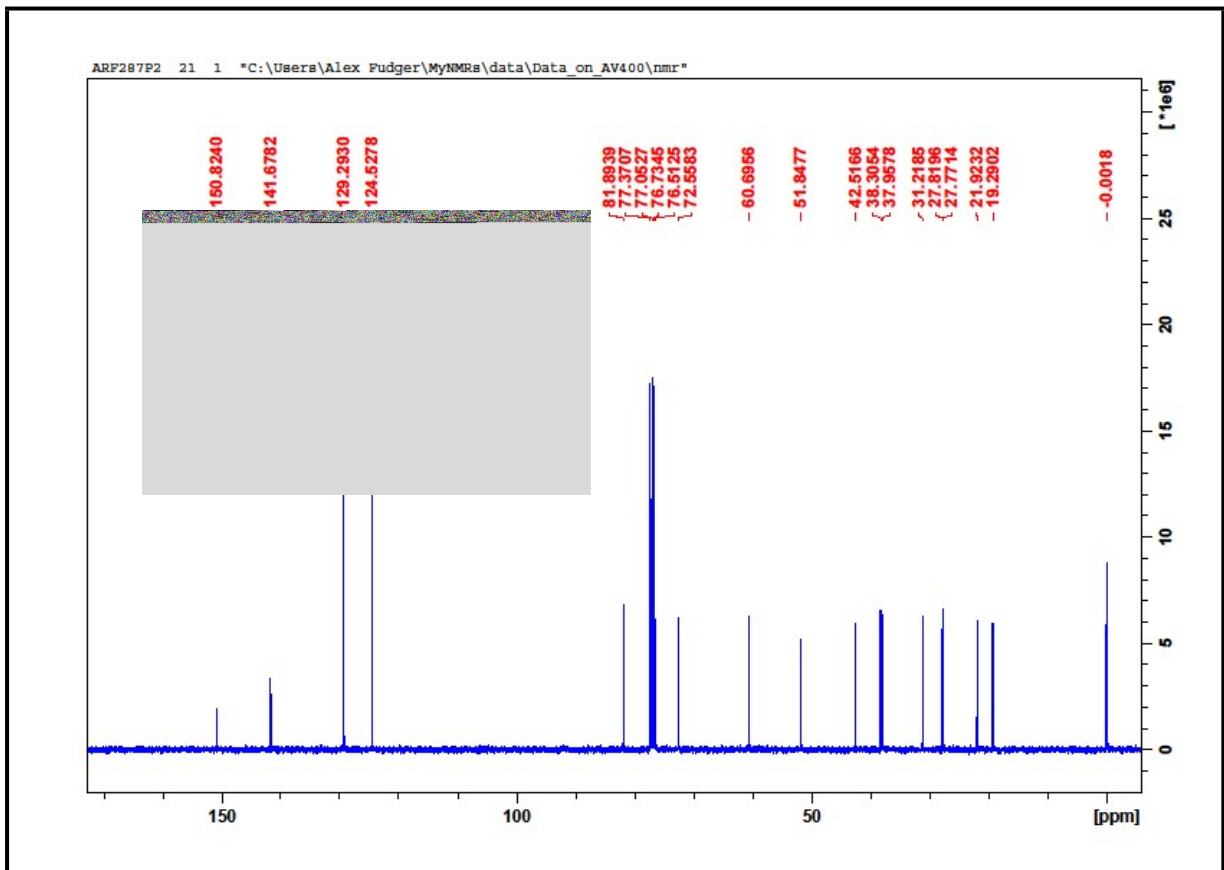



COSY NMR spectrum for compound **17f**

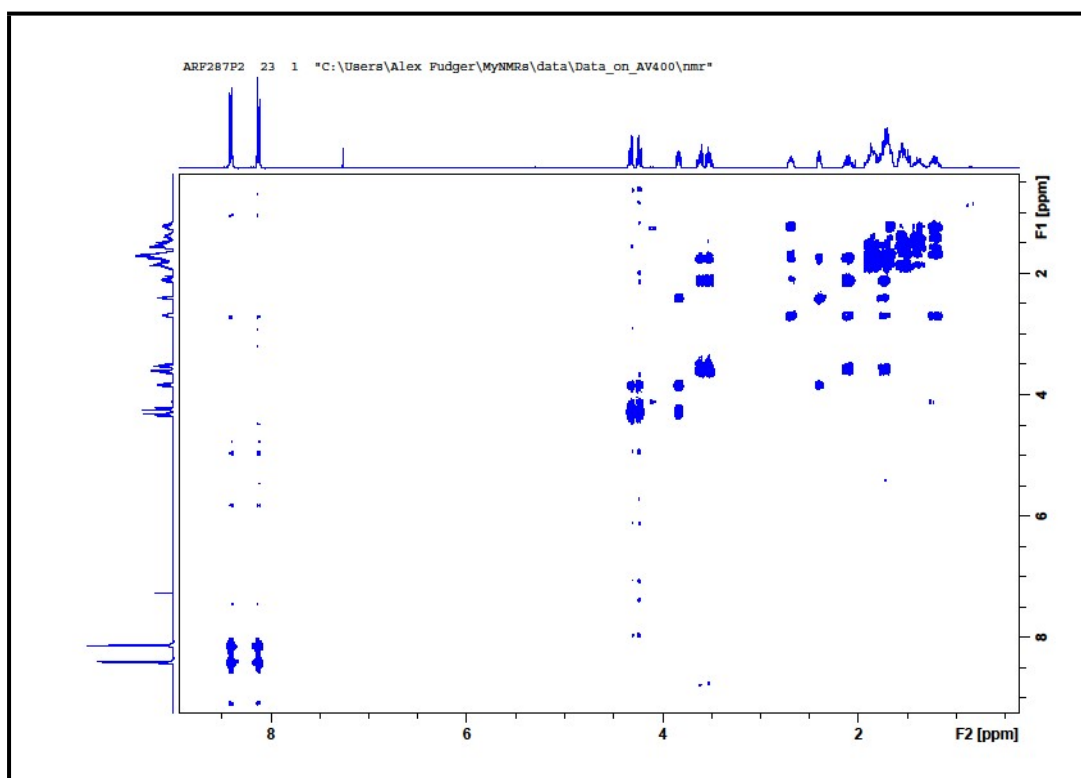

HSQC NMR spectrum for compound **17f**

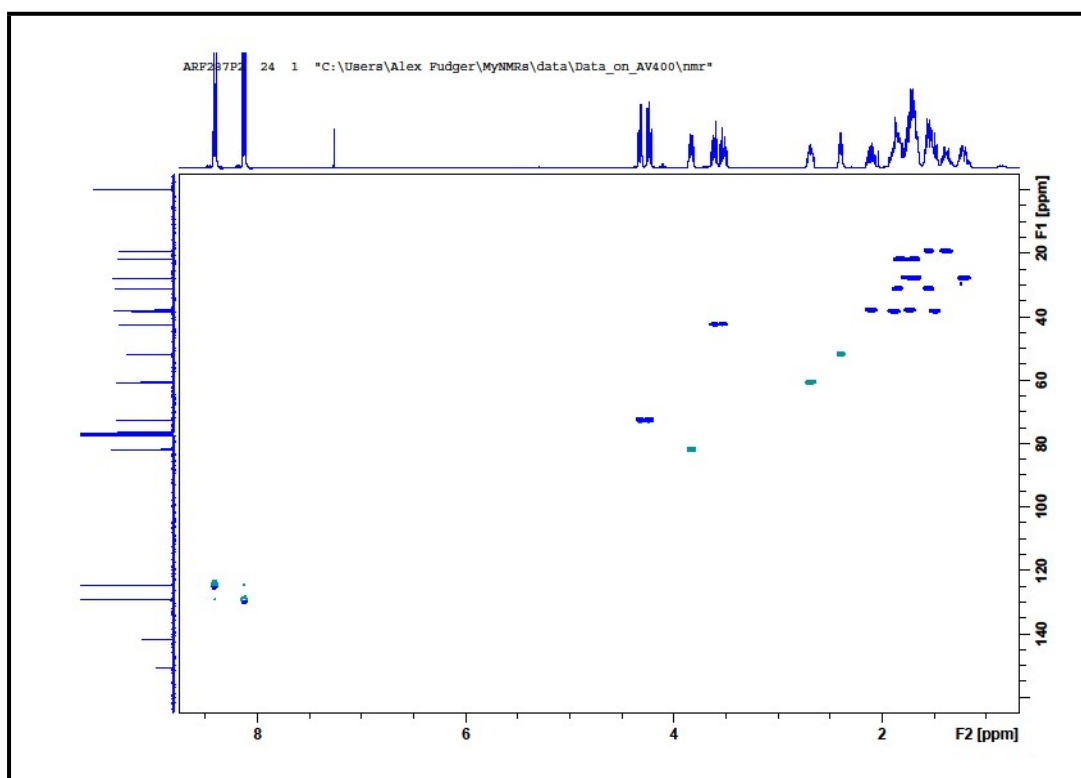

NOESY NMR spectrum for compound **17f**

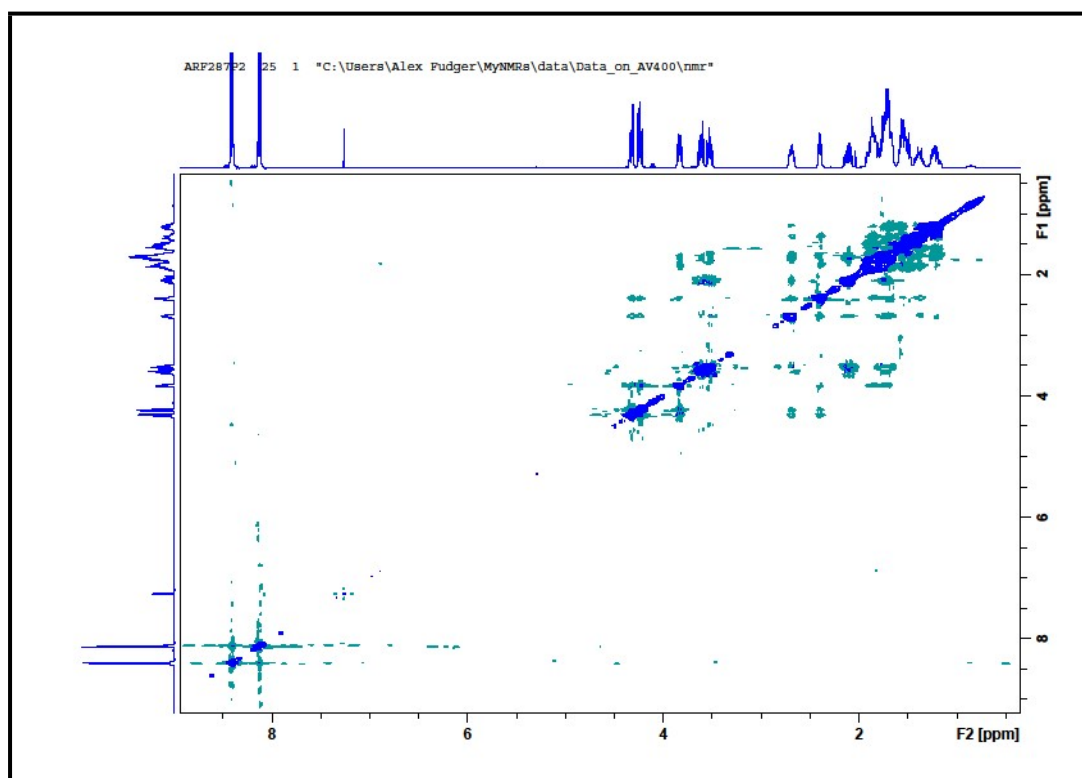

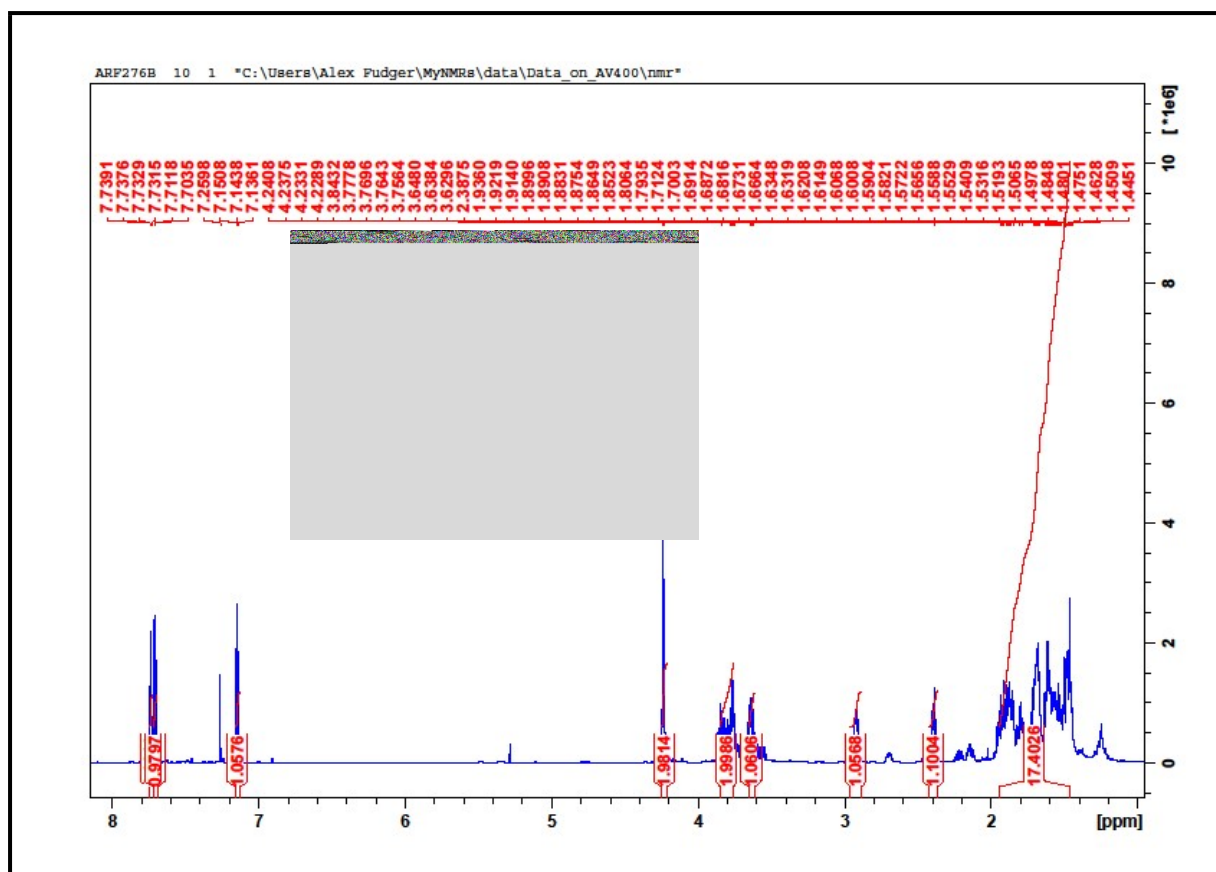

COSY NMR spectrum for compound **17ga**

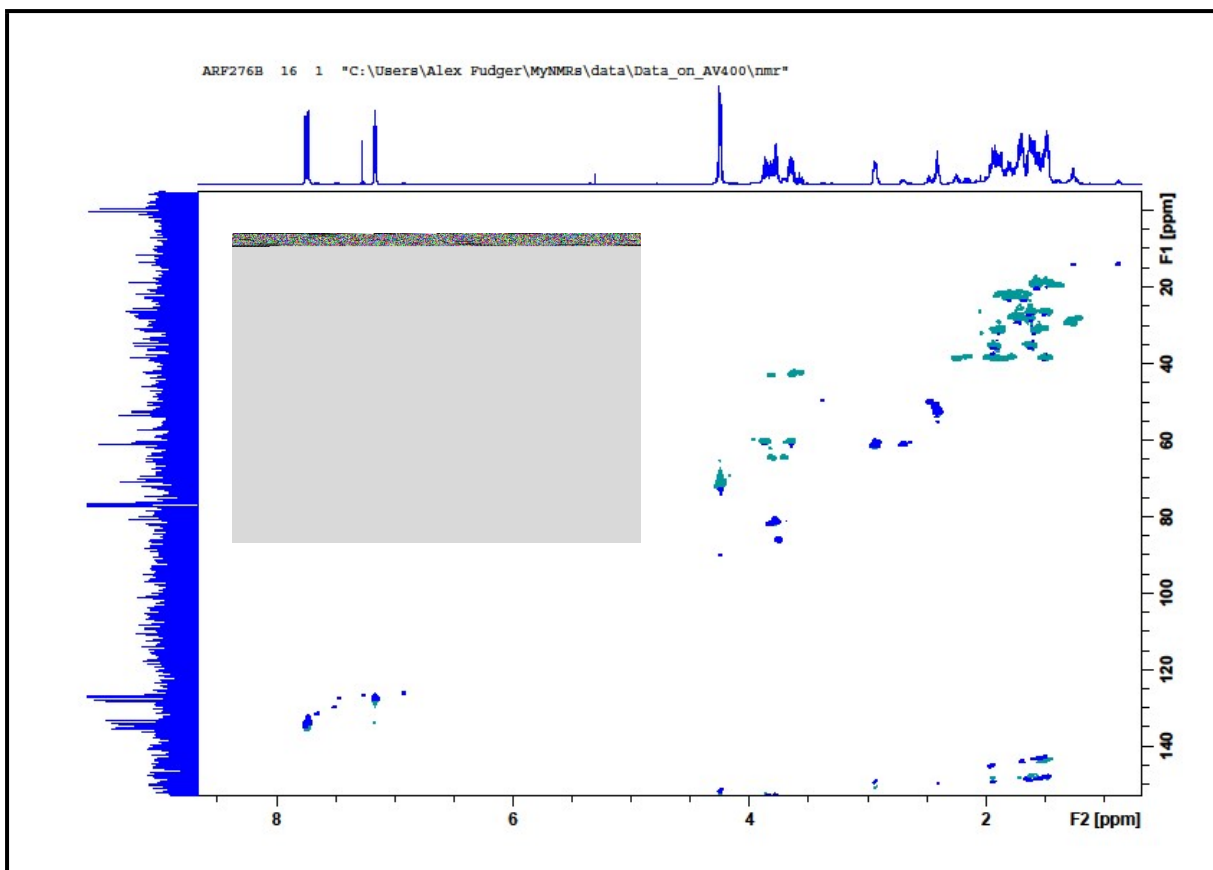

HSQC NMR spectrum for compound **17ga**

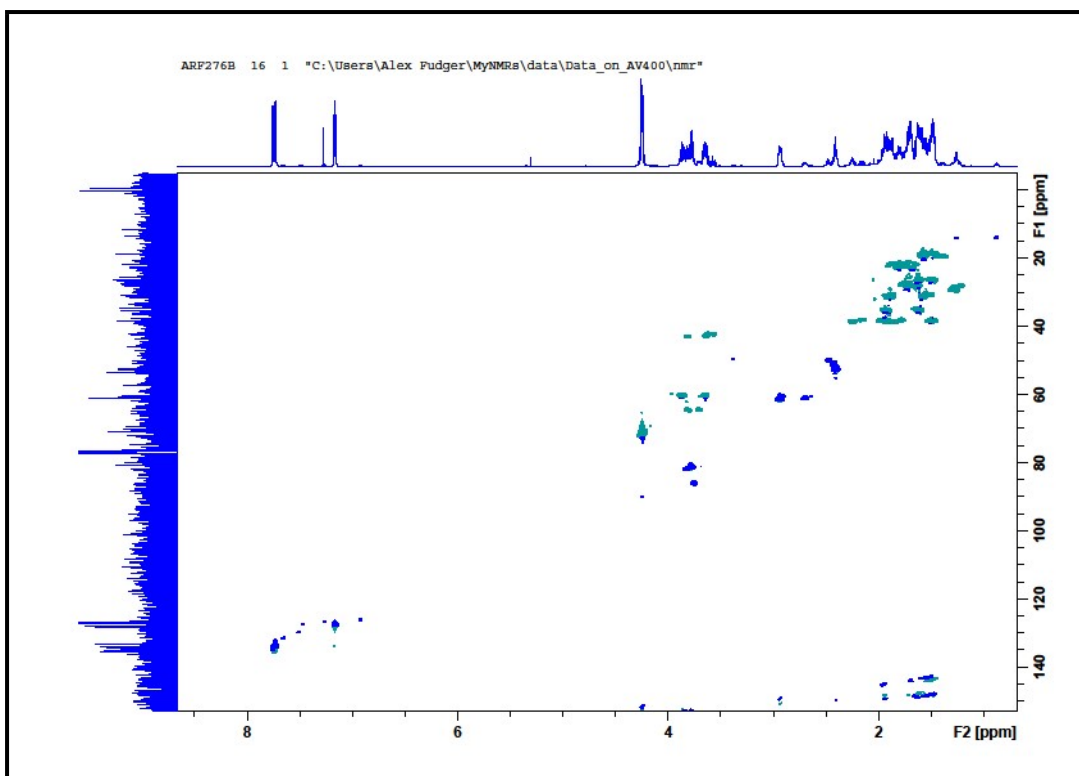

NOESY NMR spectrum for compound **17ga**

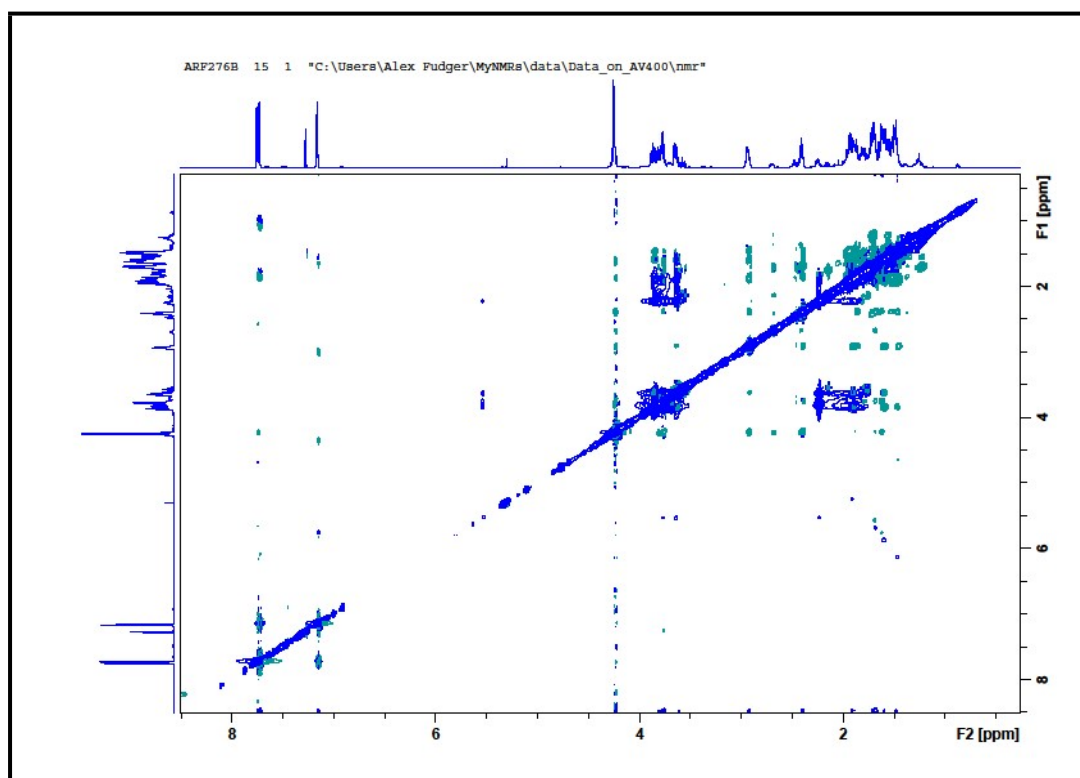

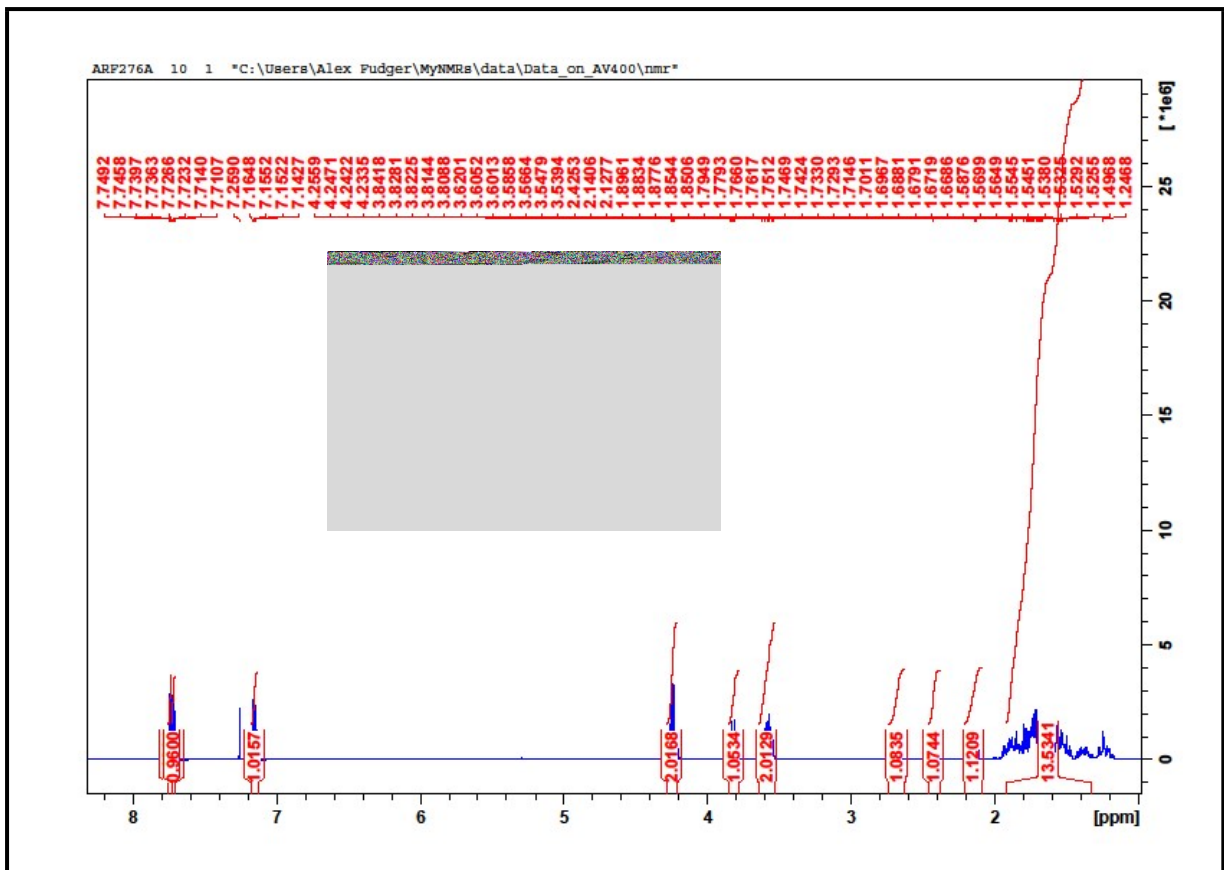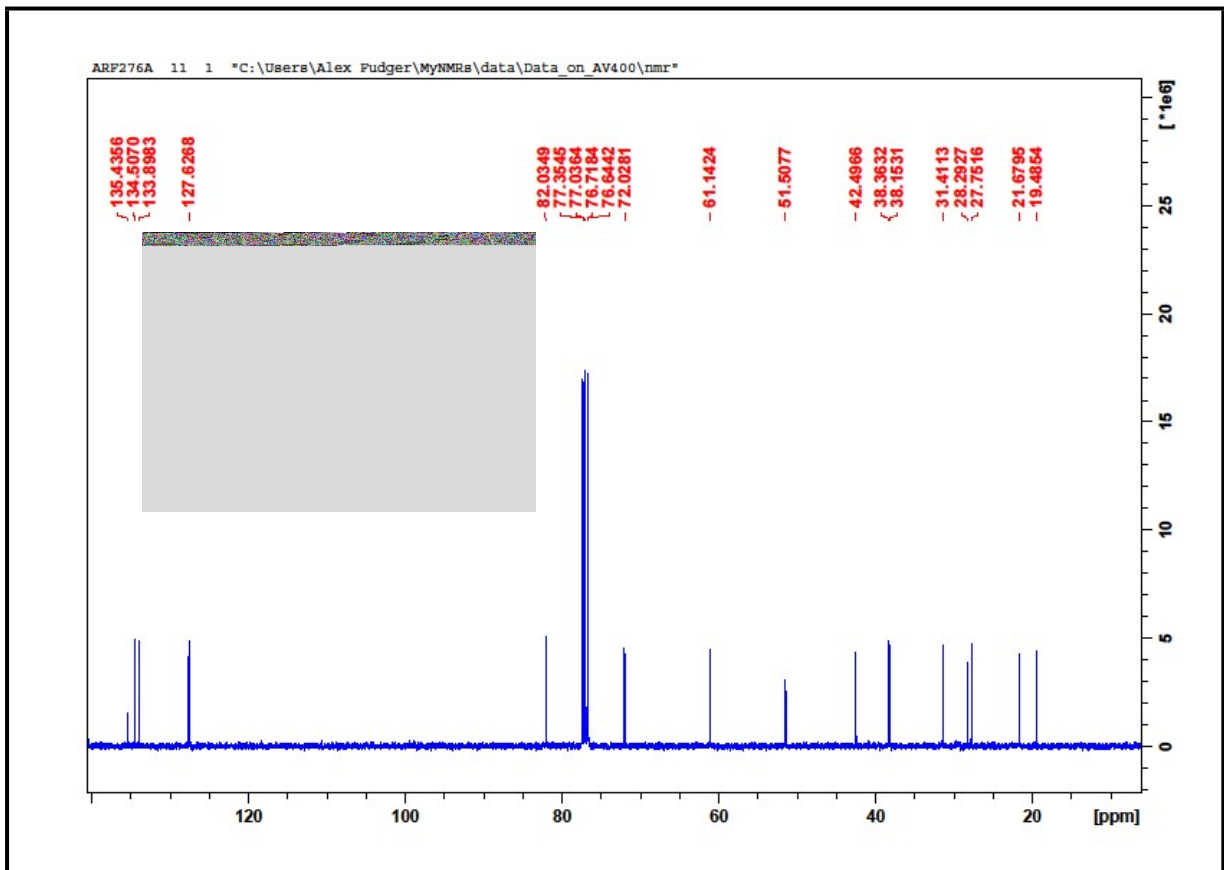





COSY NMR spectrum for compound **17gb**

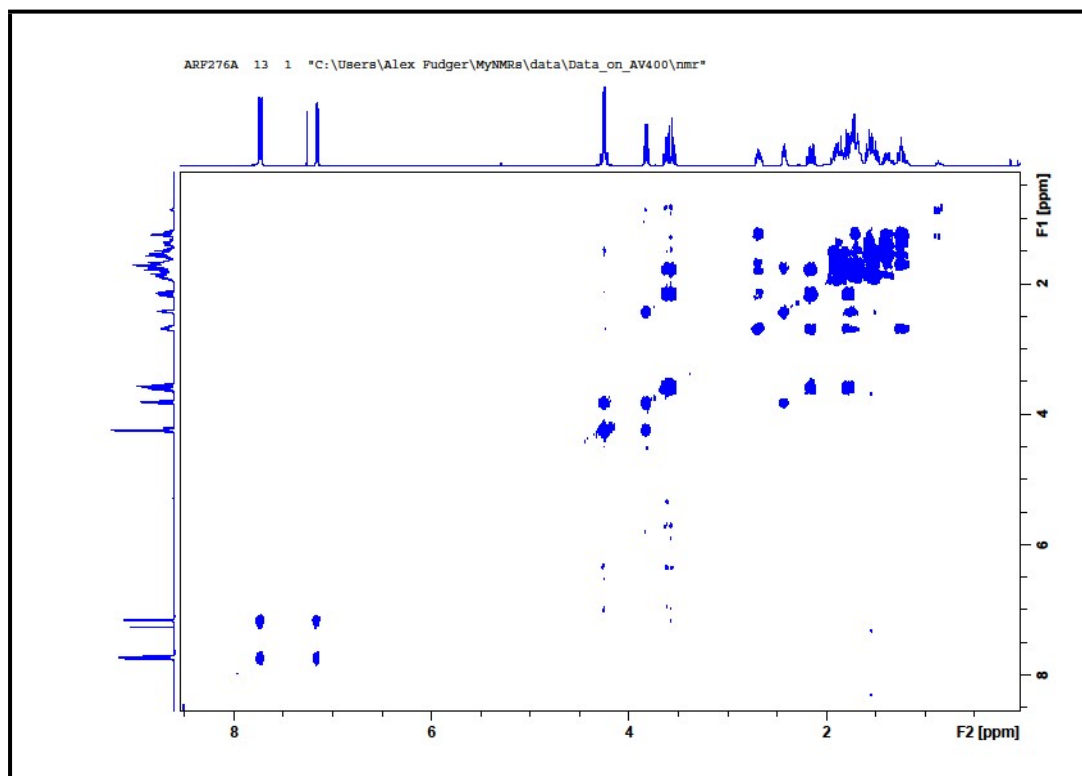

HSQC NMR spectrum for compound **17gb**

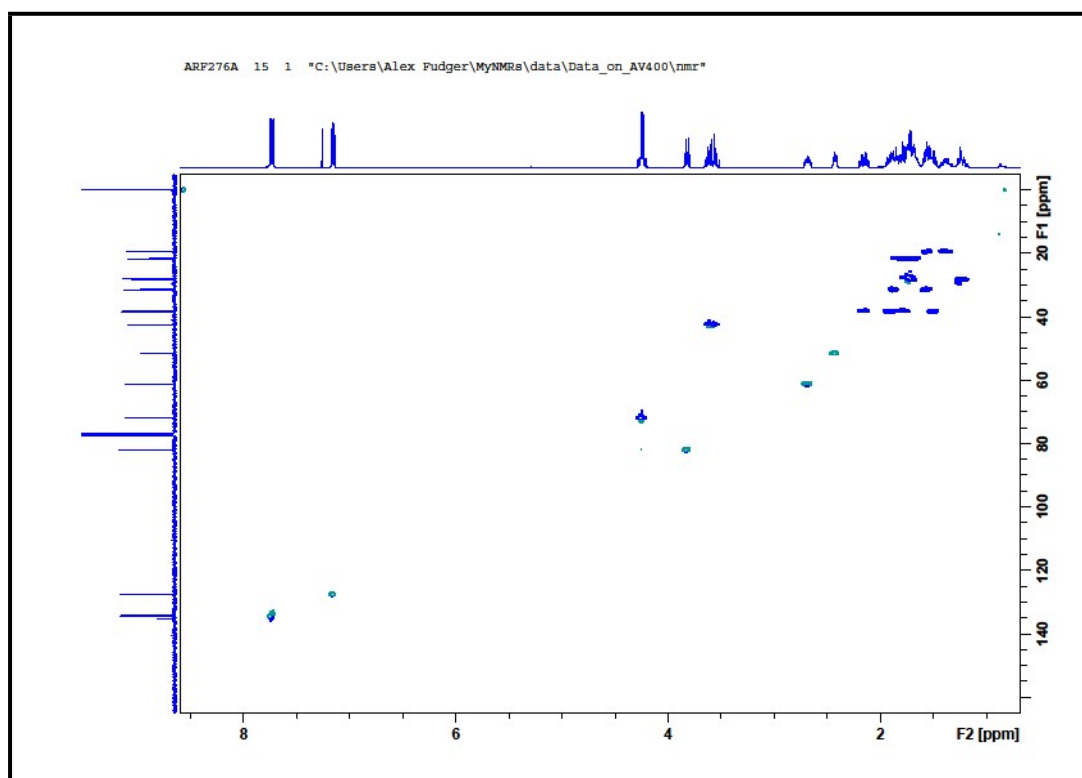

NOESY NMR spectrum for compound **17gb**

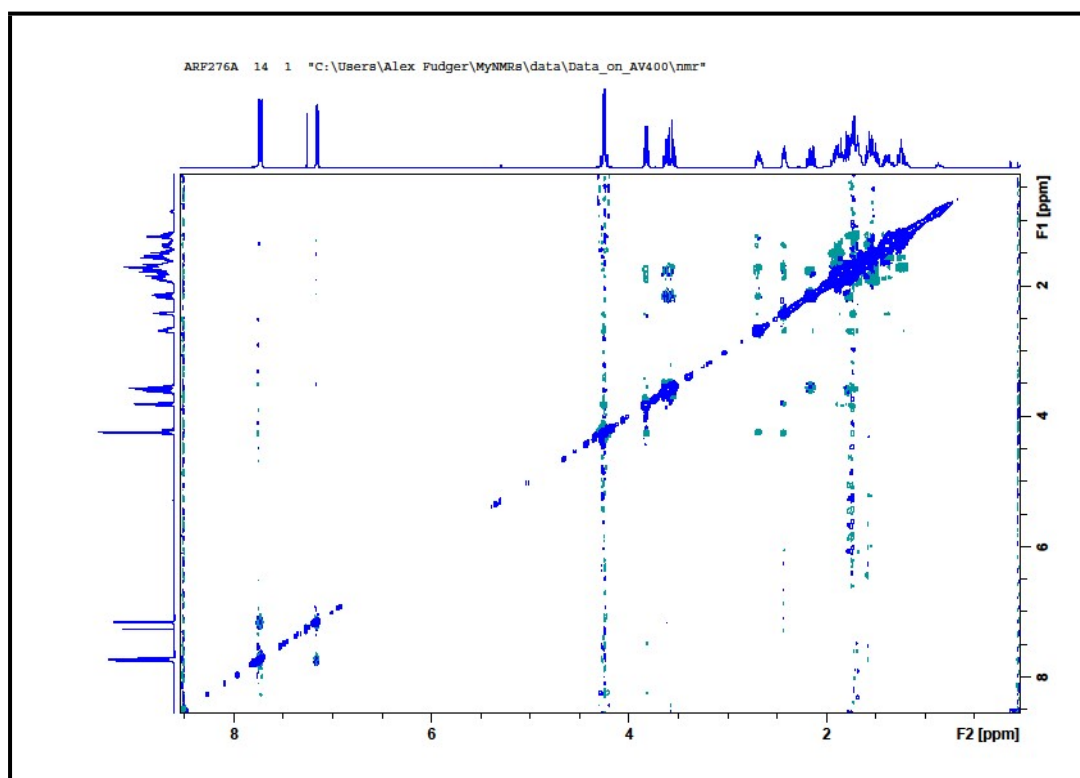

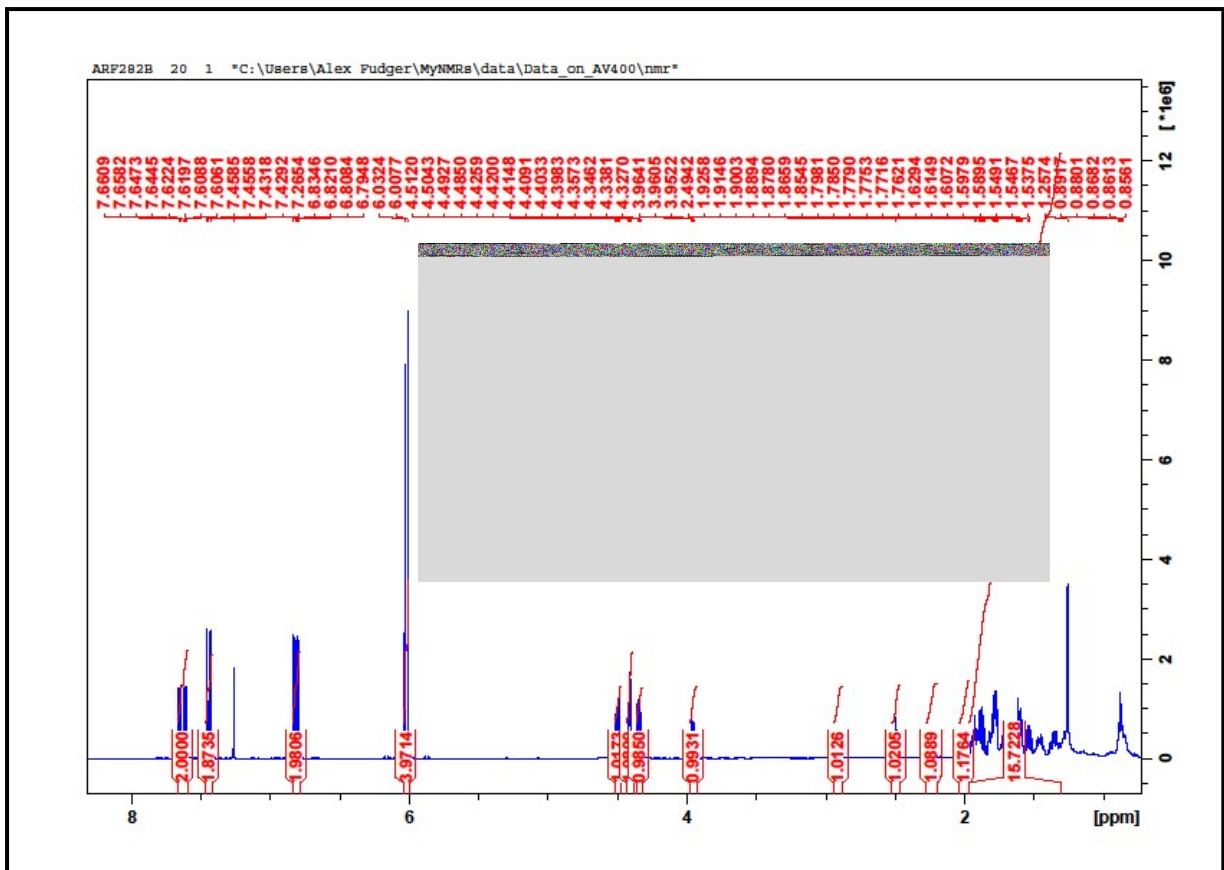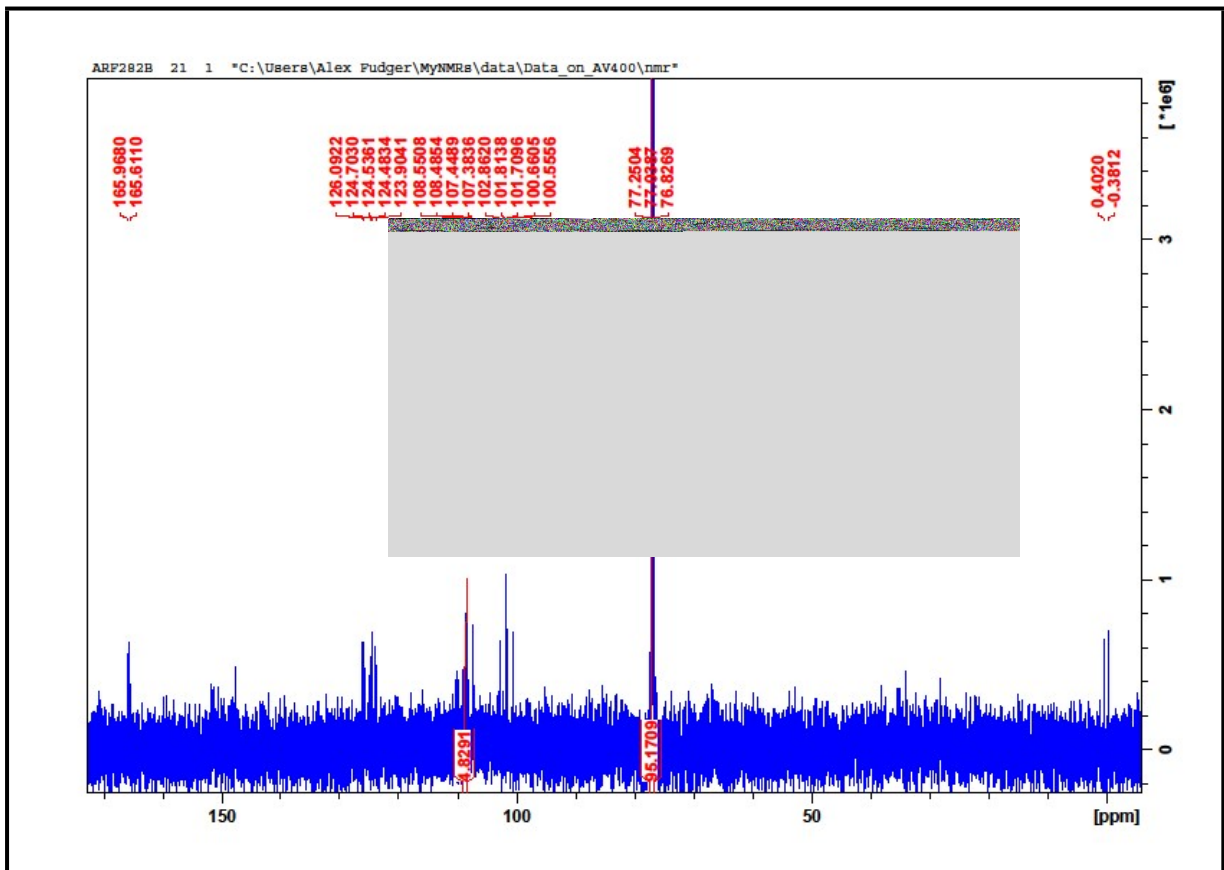



COSY spectrum for compound **17h**

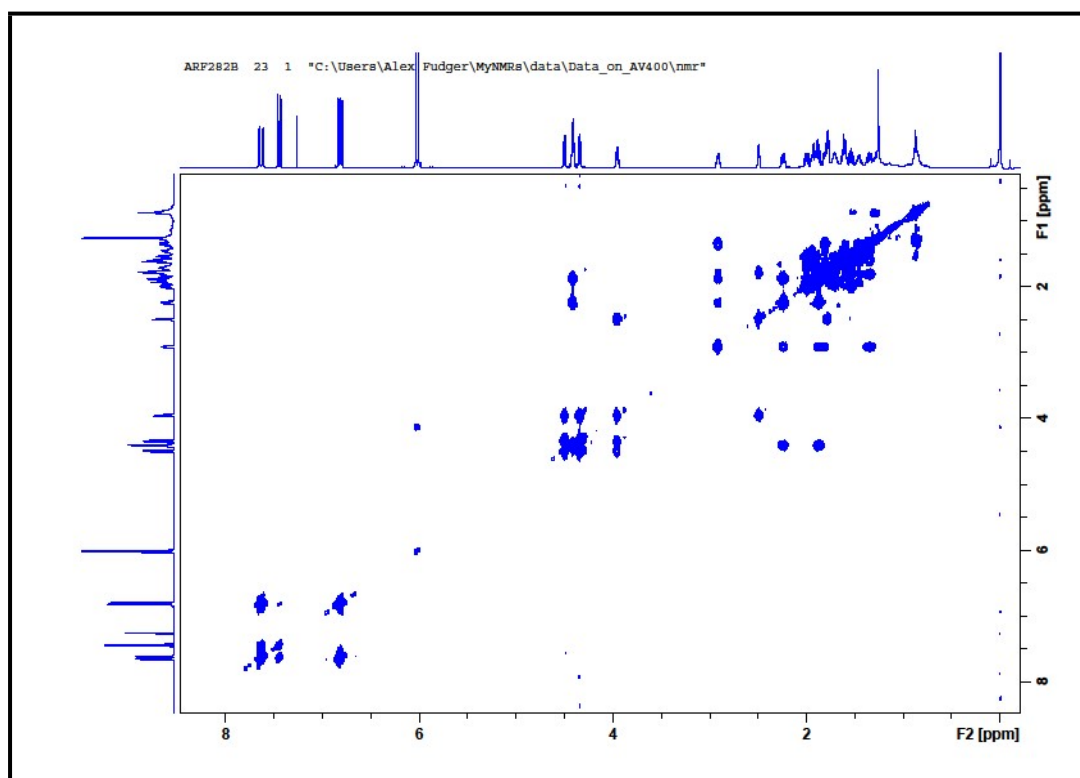

HSQC NMR spectrum for compound **17h**

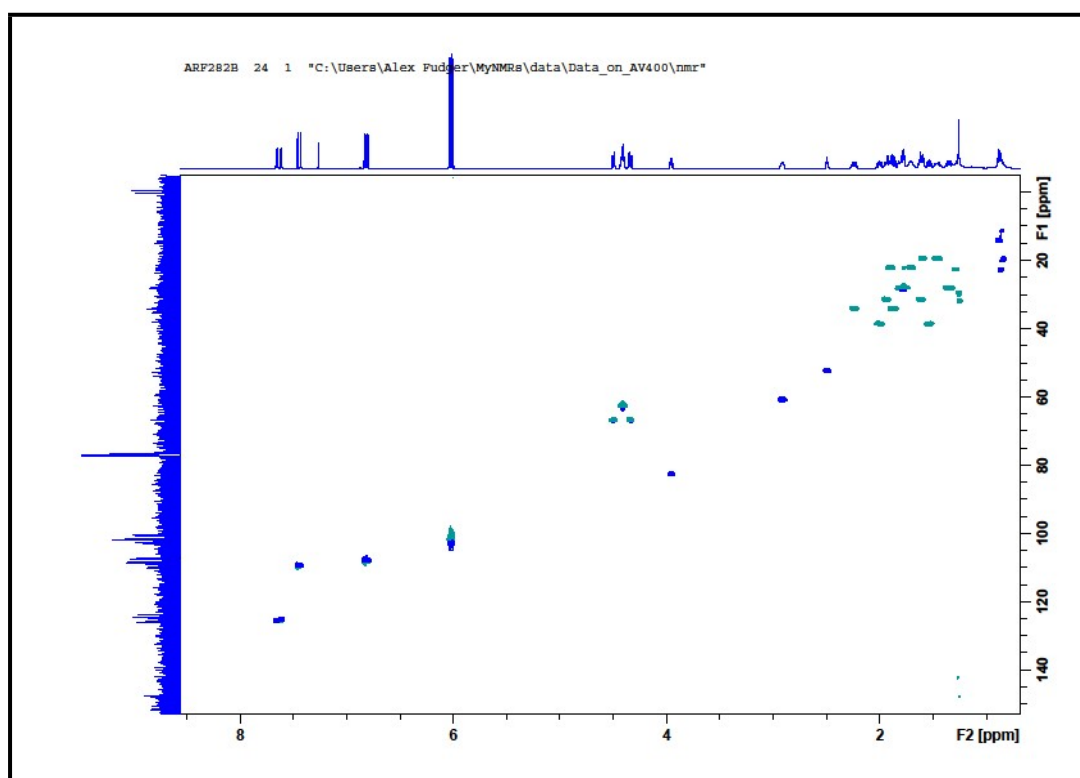

NOESY NMR spectrum for compound **17h**

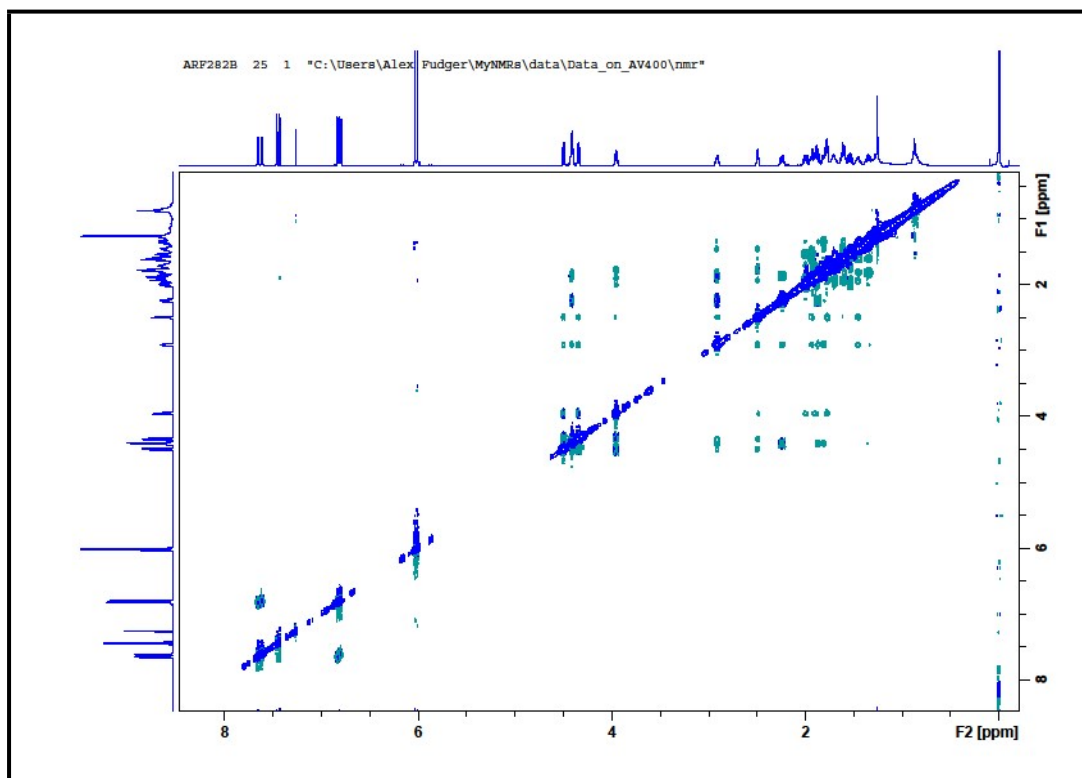

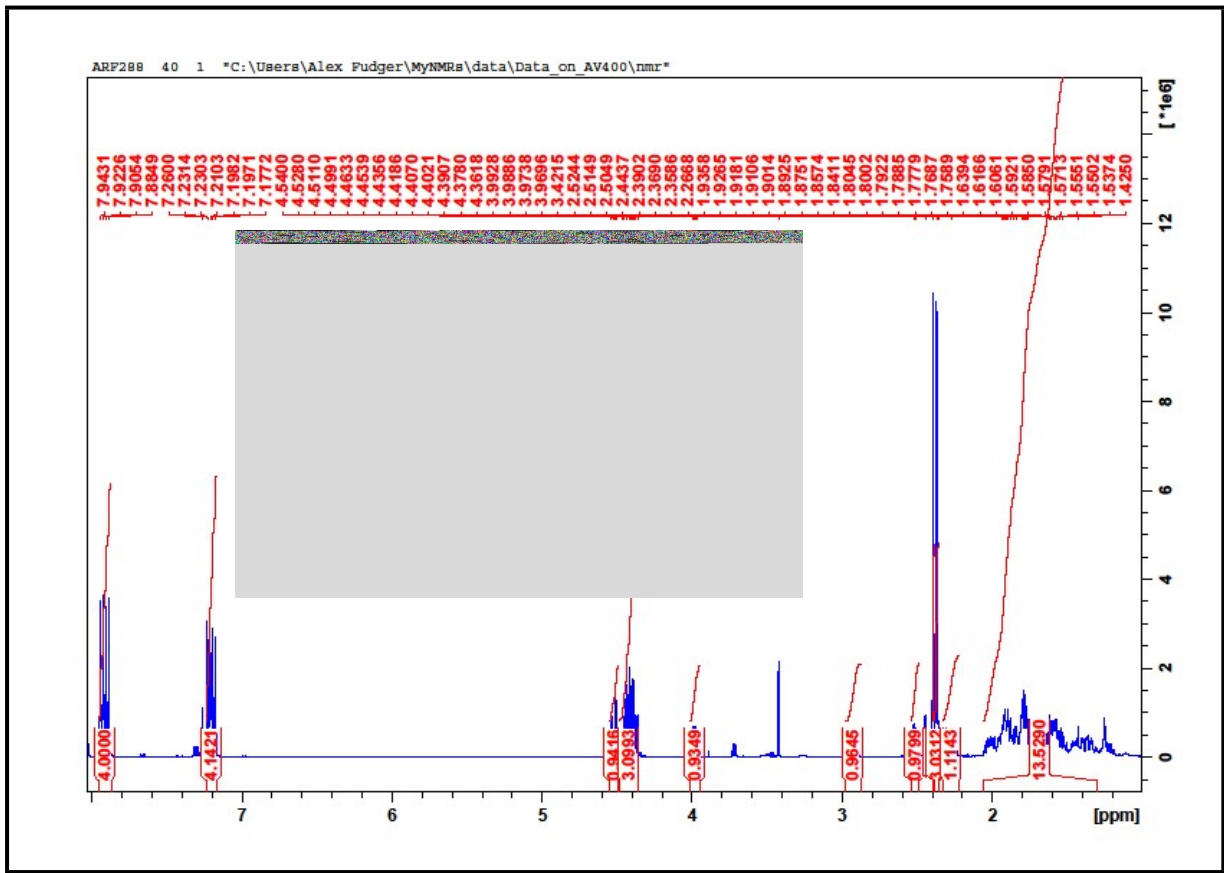



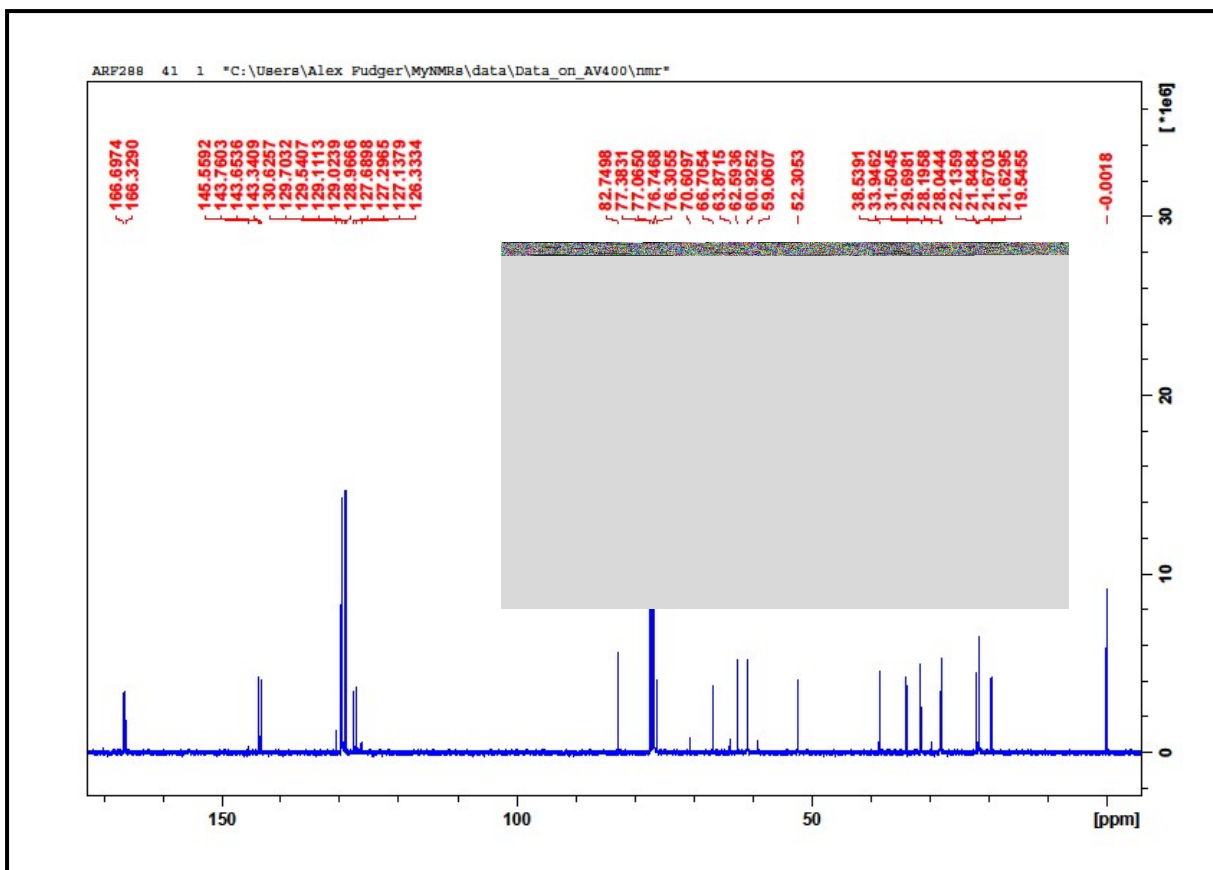

COSY NMR spectrum for compound 17i

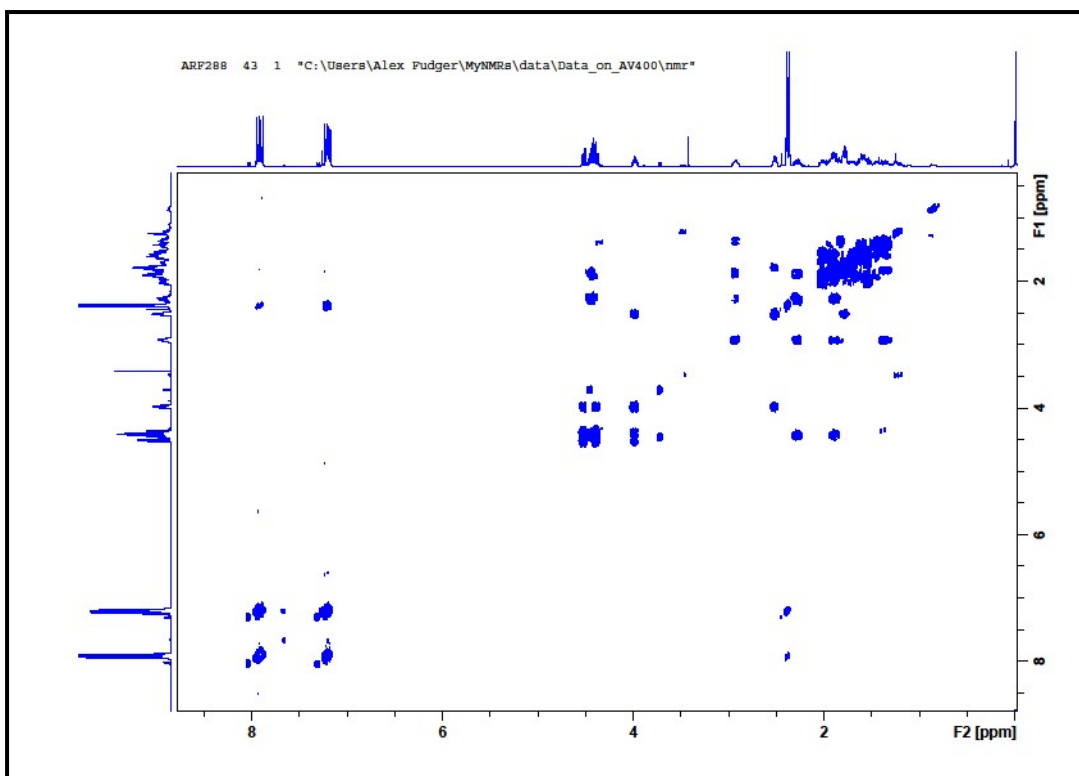

HSQC NMR spectrum for compound **17i**

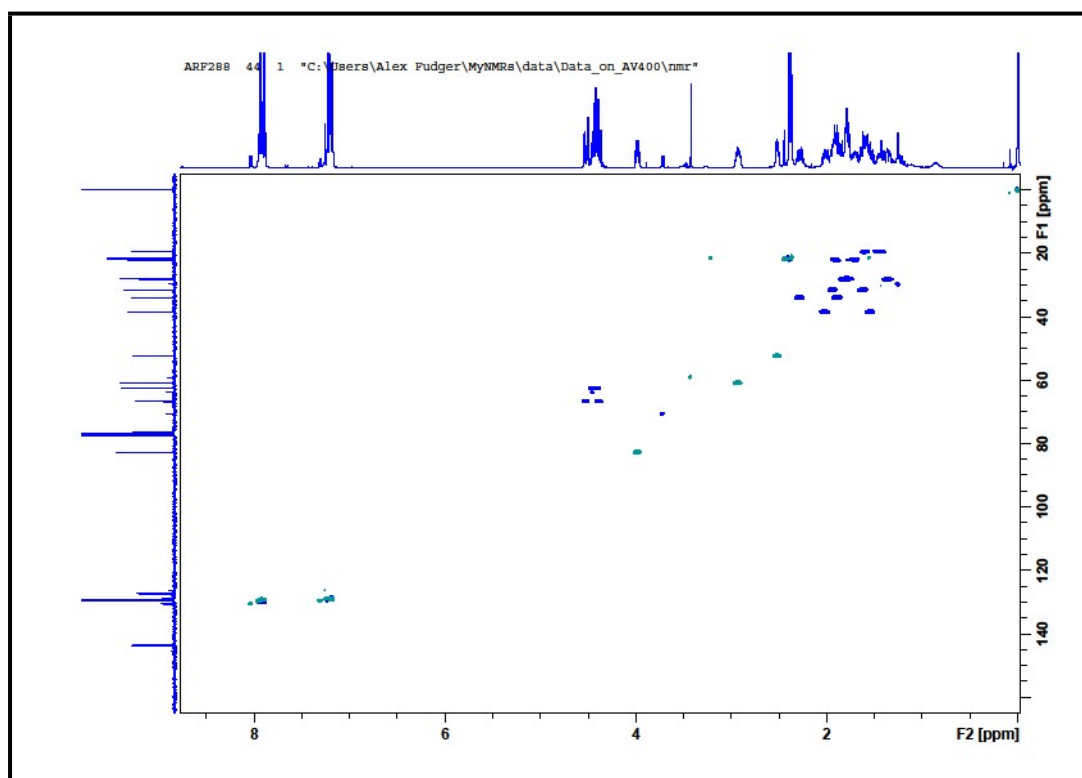

NOESY NMR spectrum for compound **17i**

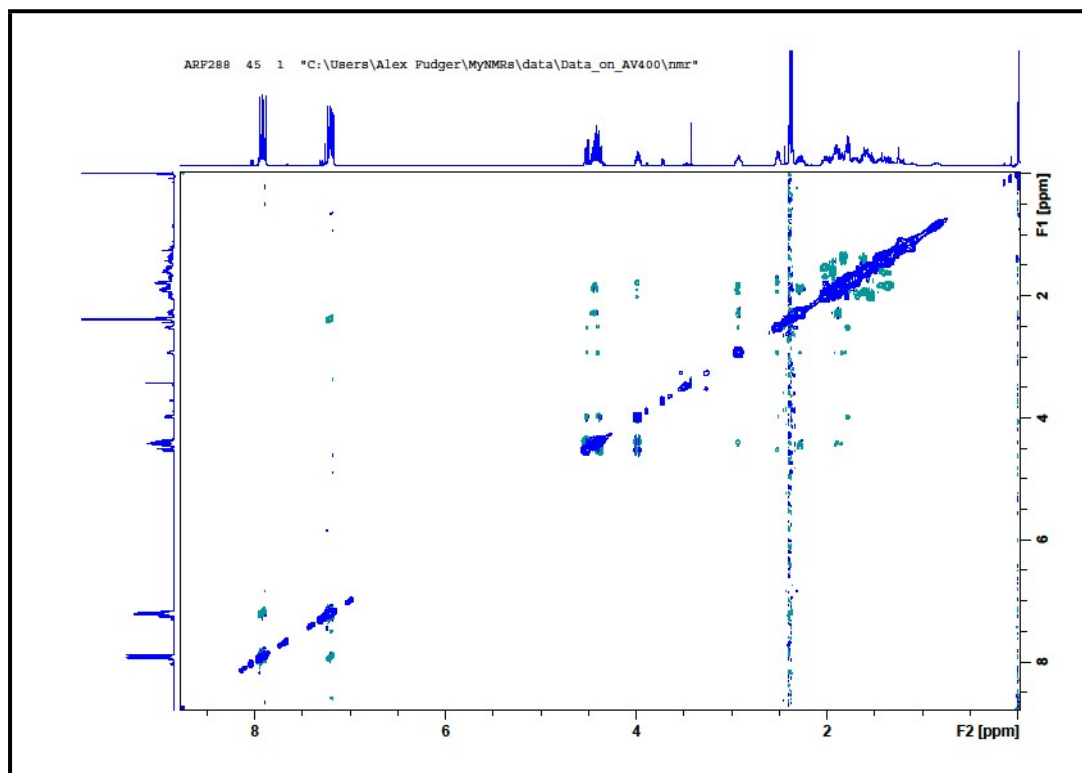

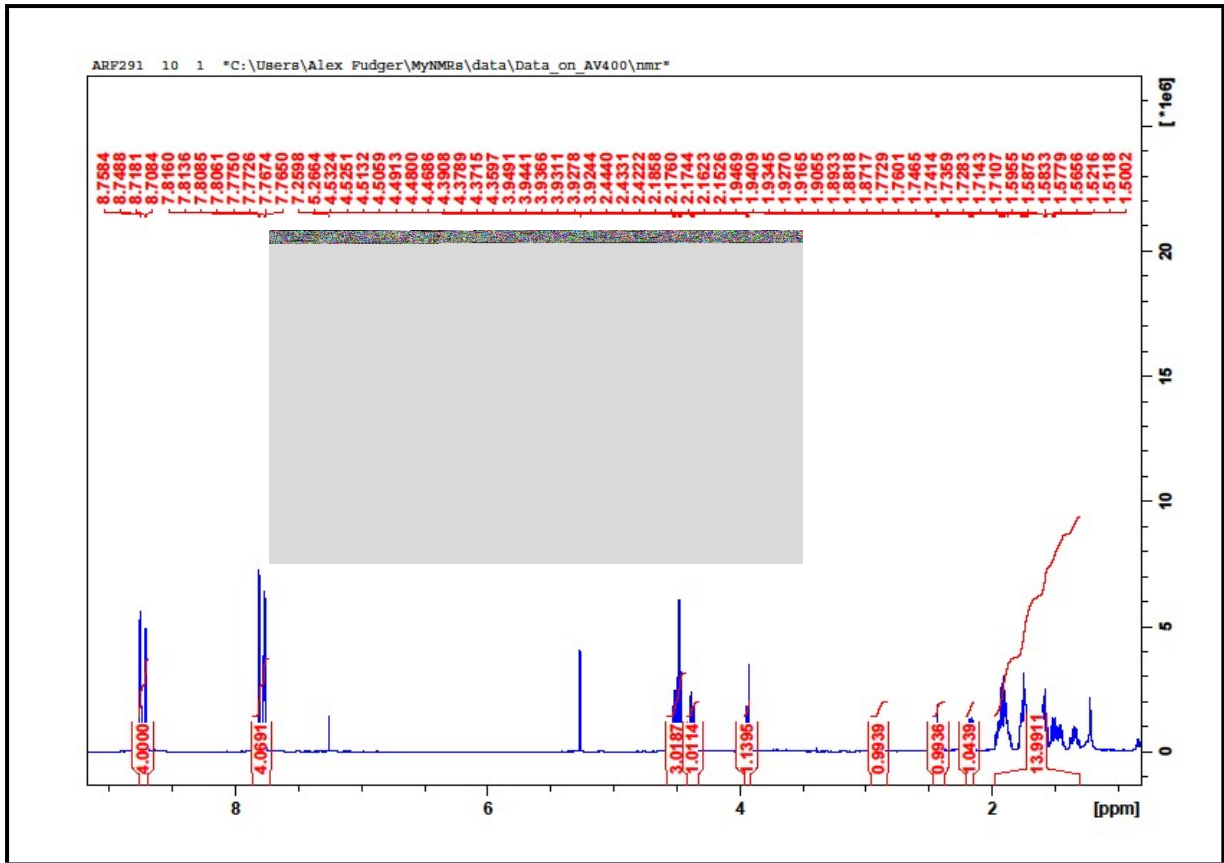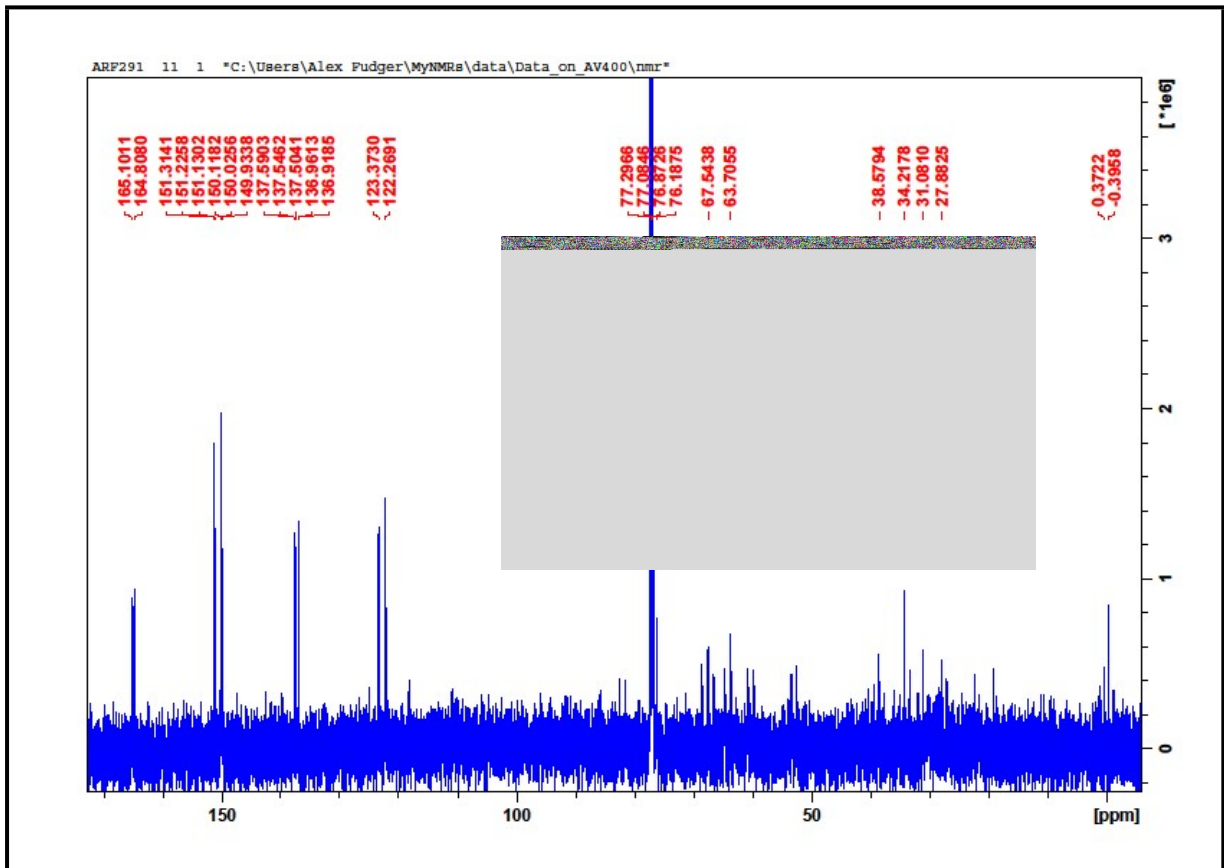



COSY NMR spectrum for compound **17j**

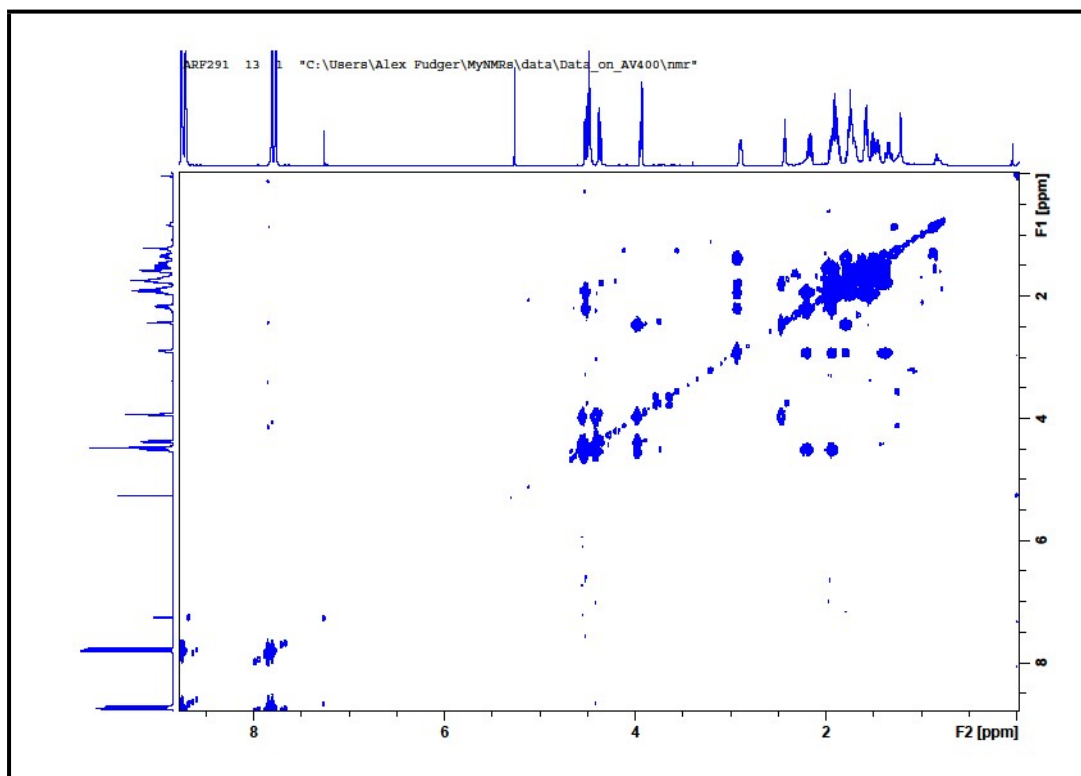

HSQC NMR spectrum for compound **17j**

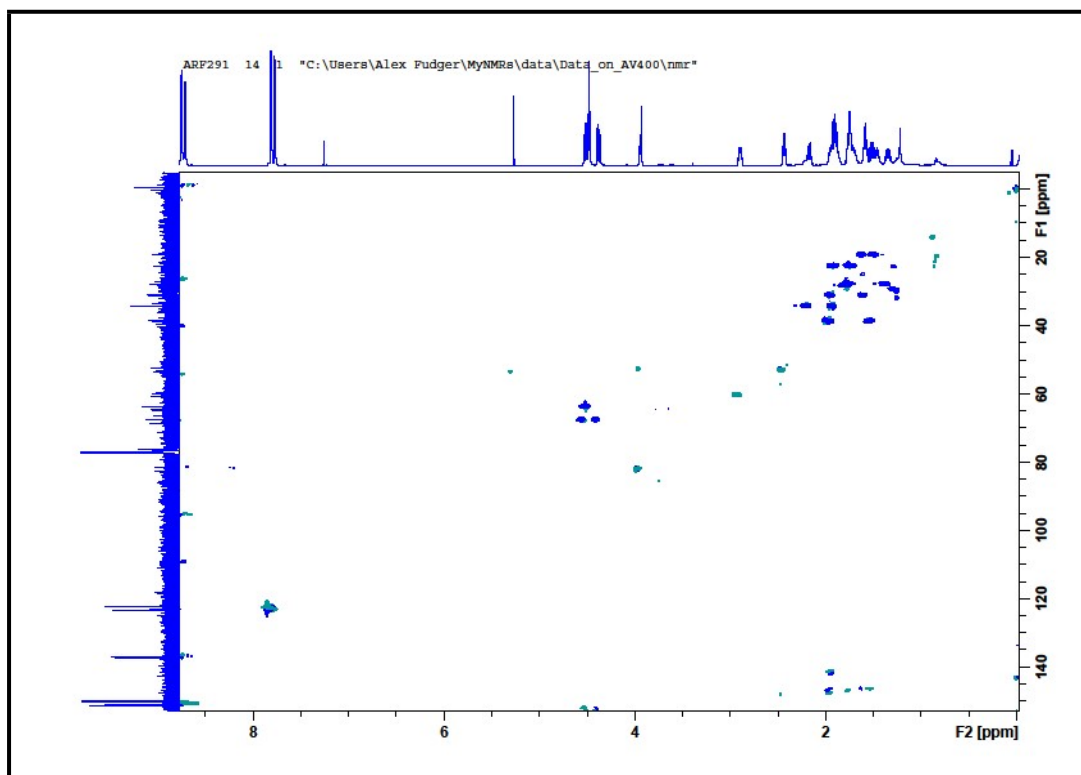

NOESY NMR spectrum for compound (242)

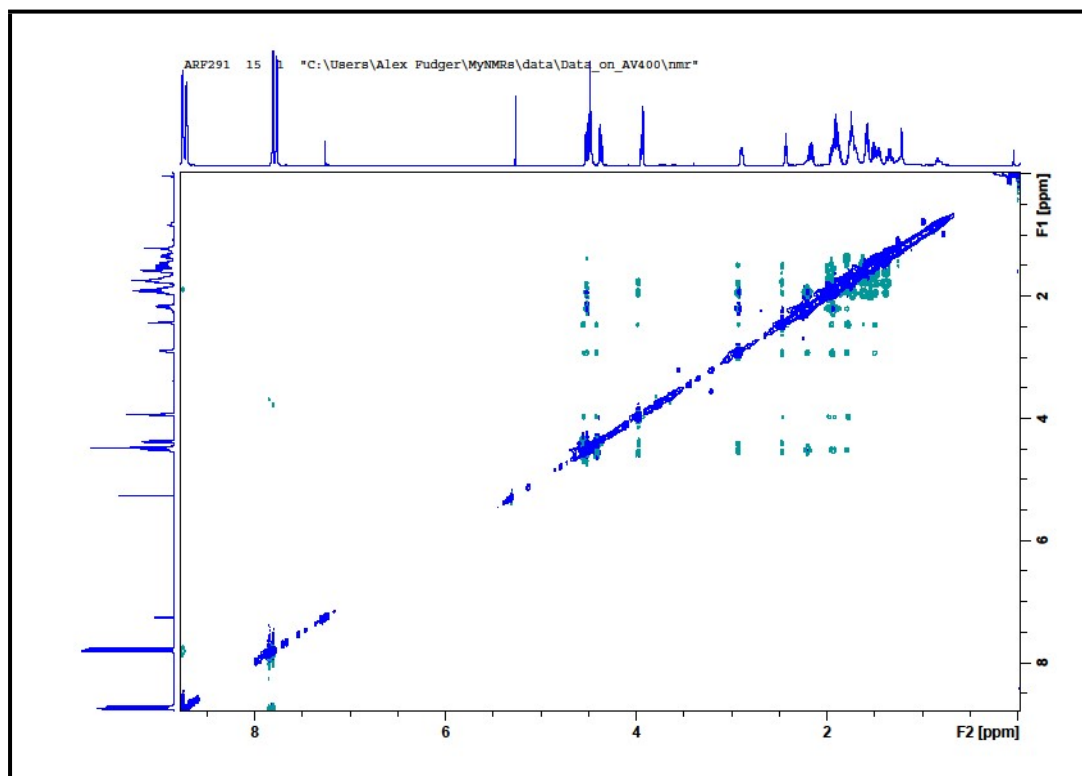

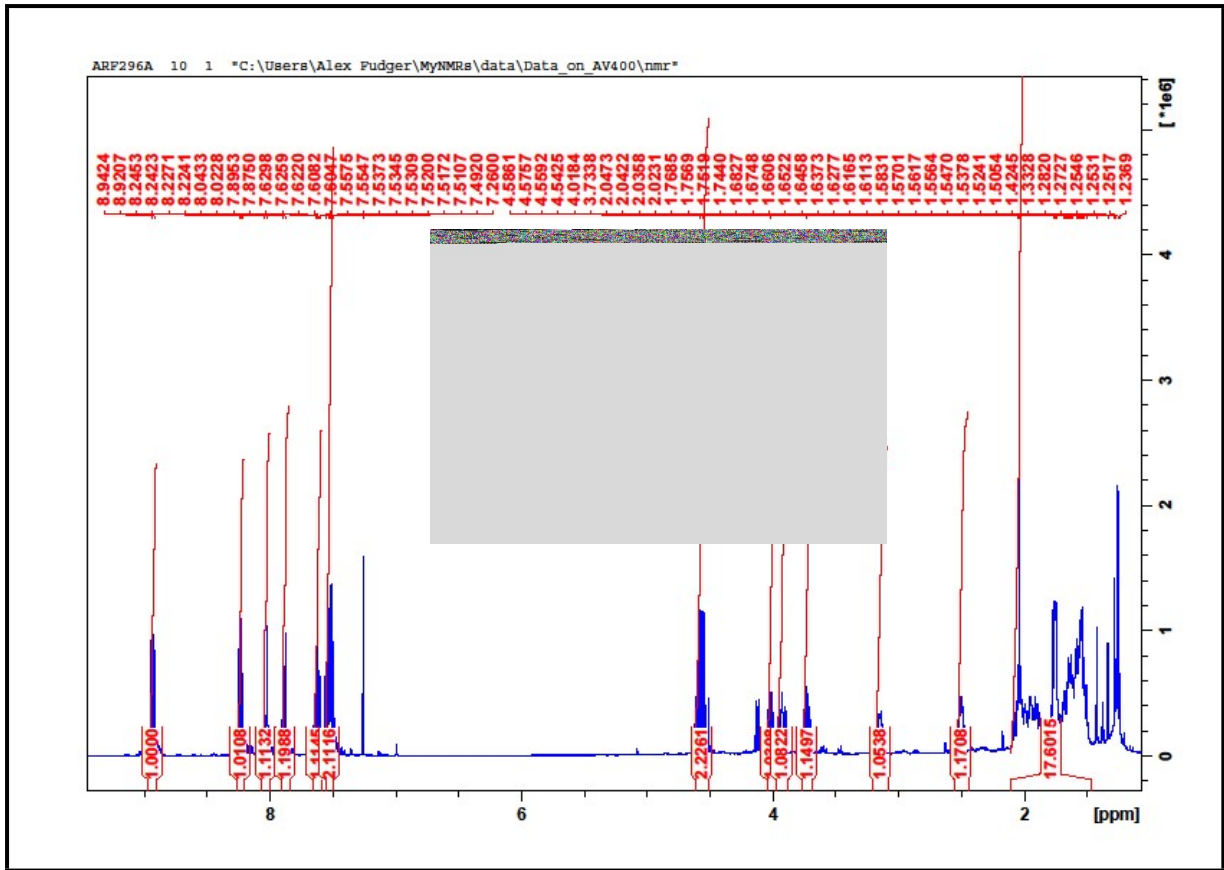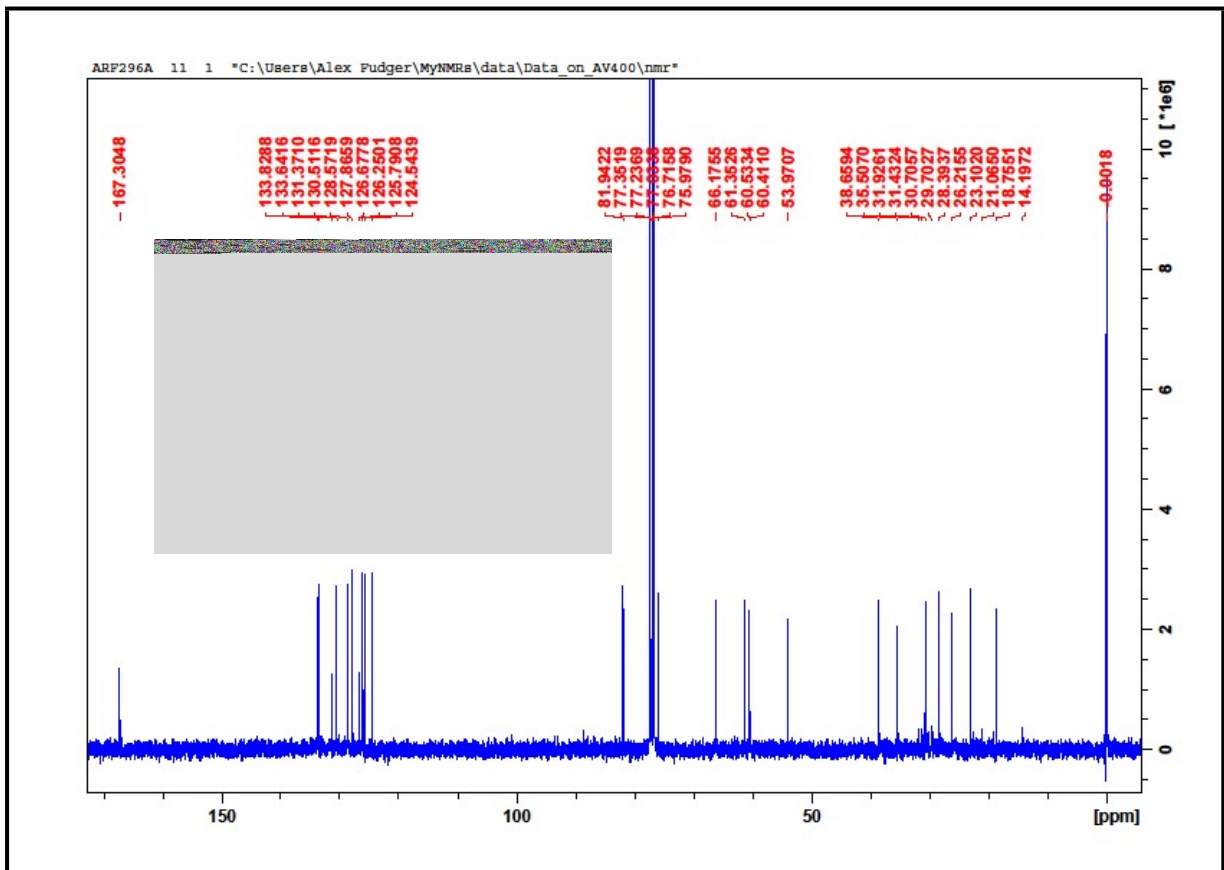





COSY NMR spectrum for compound **17ka**

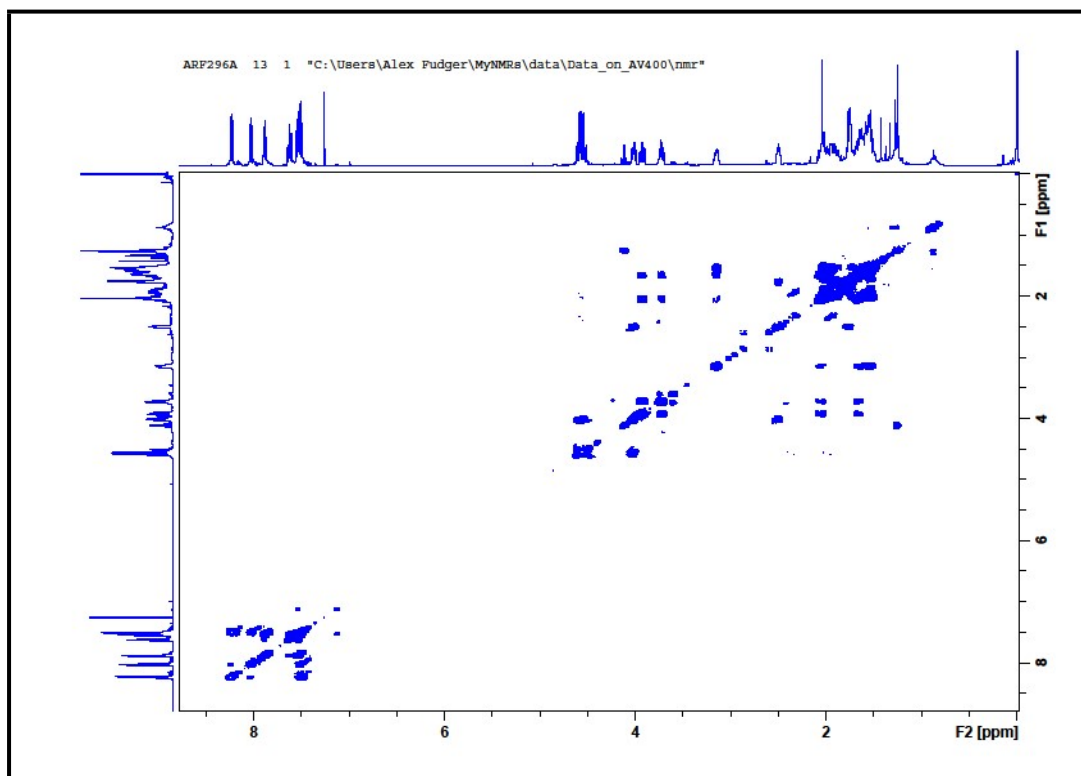

HSQC NMR spectrum for compound **17ka**

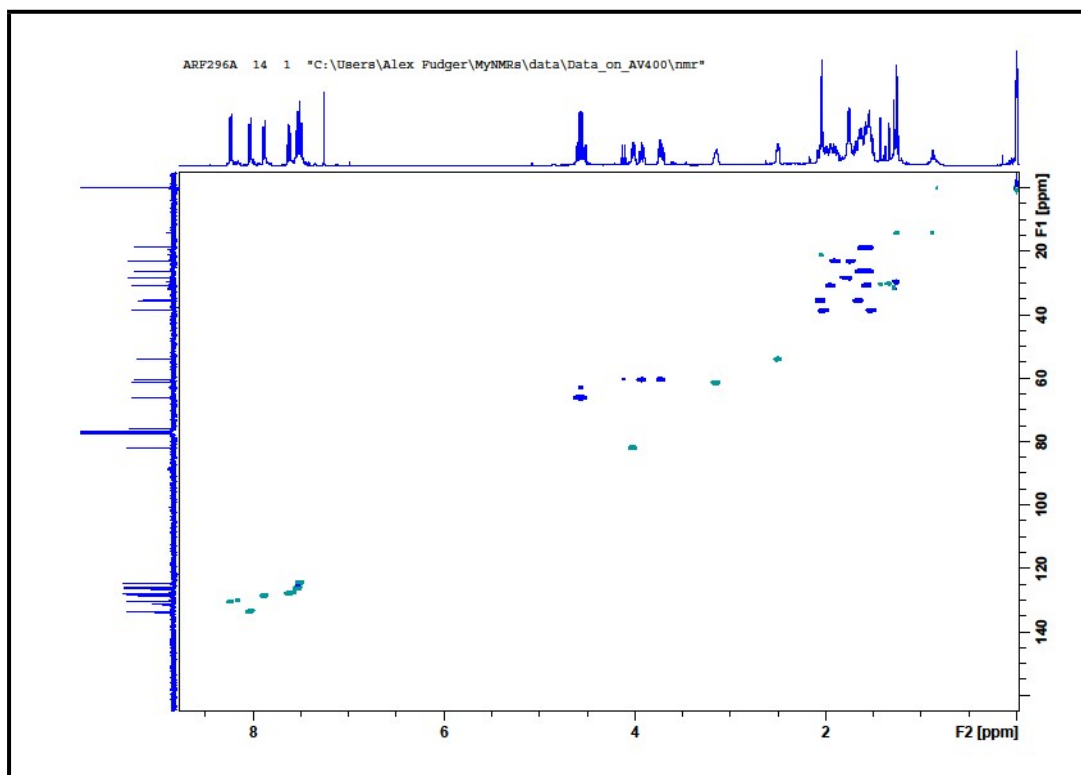

NOESY NMR spectrum for compound **17ka**

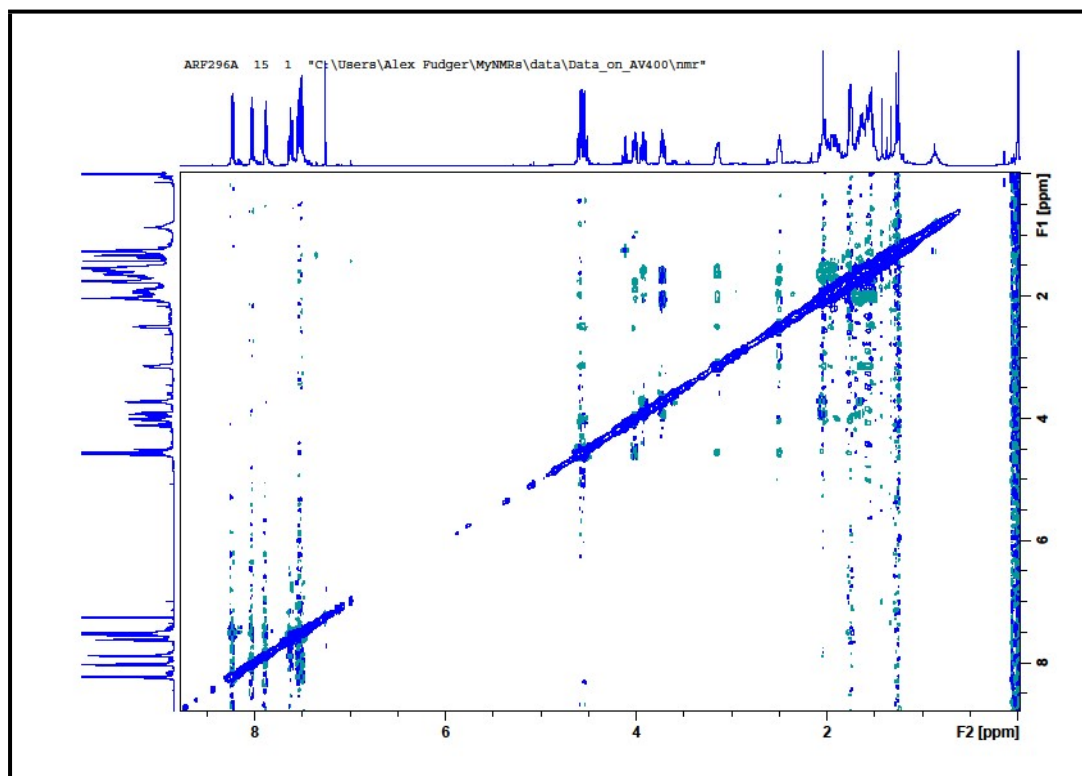

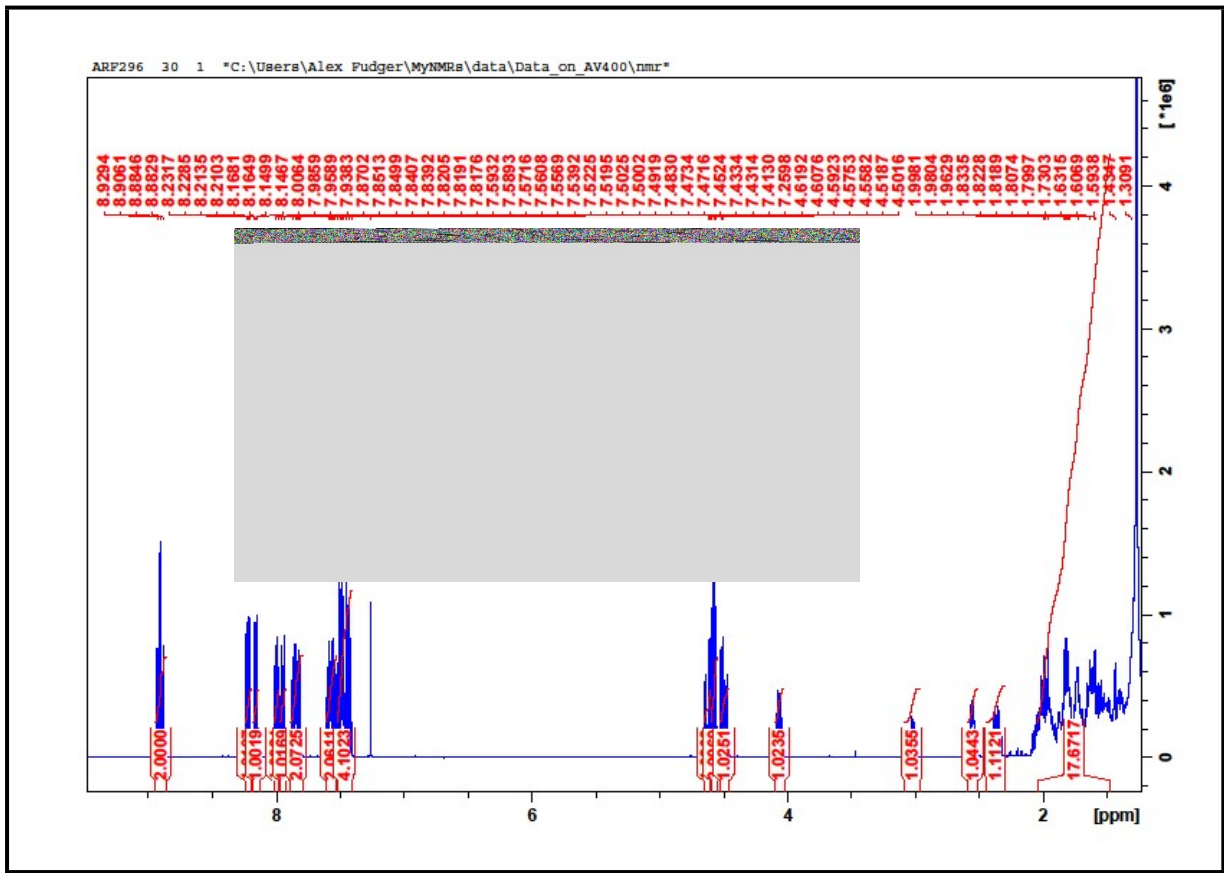

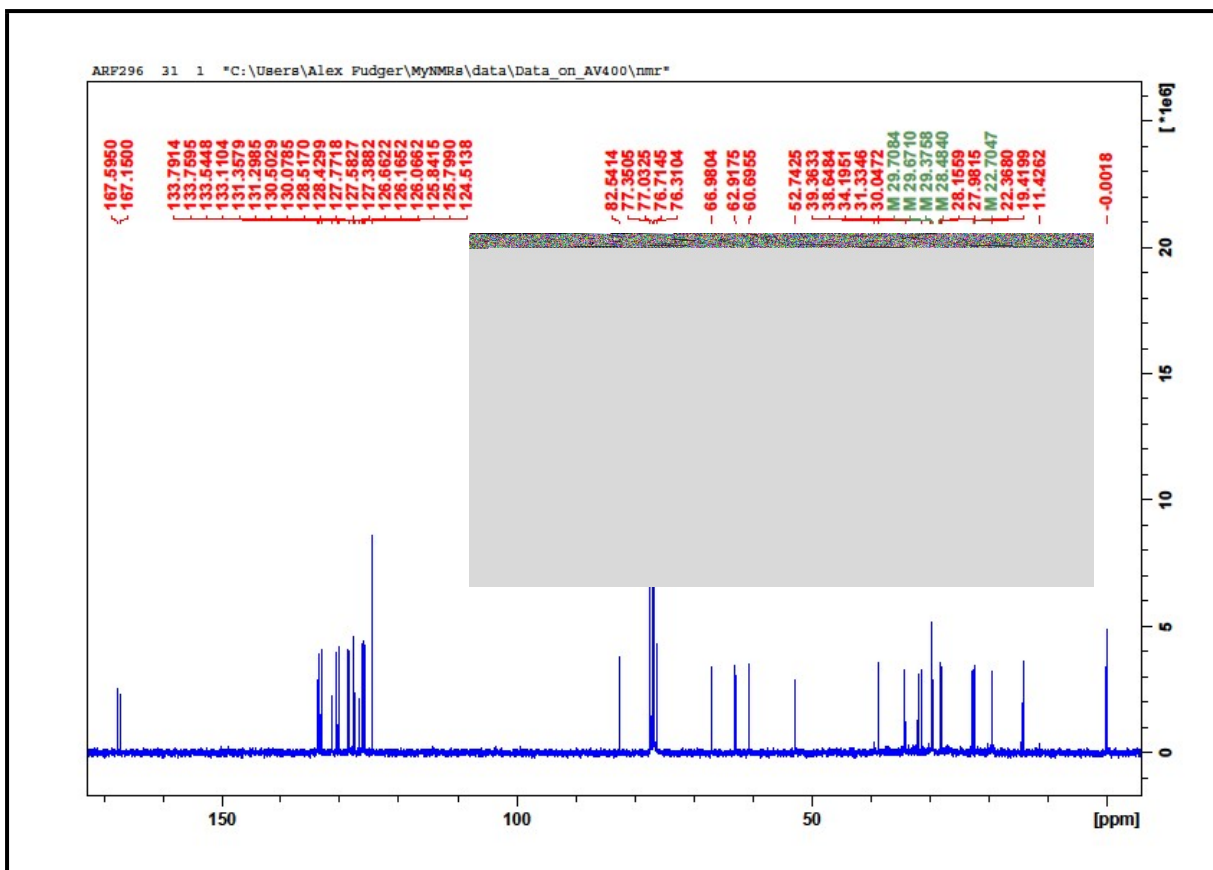

COSY NMR spectrum for compound 17kb

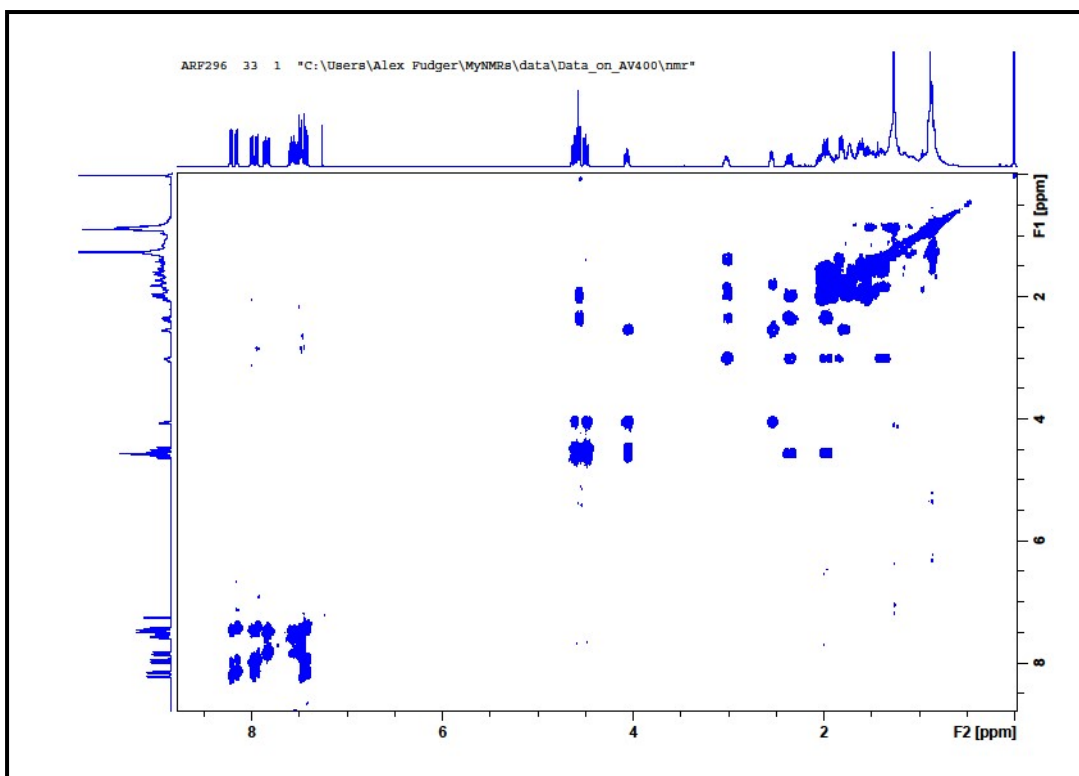

HSQC NMR spectrum for compound **17kb**

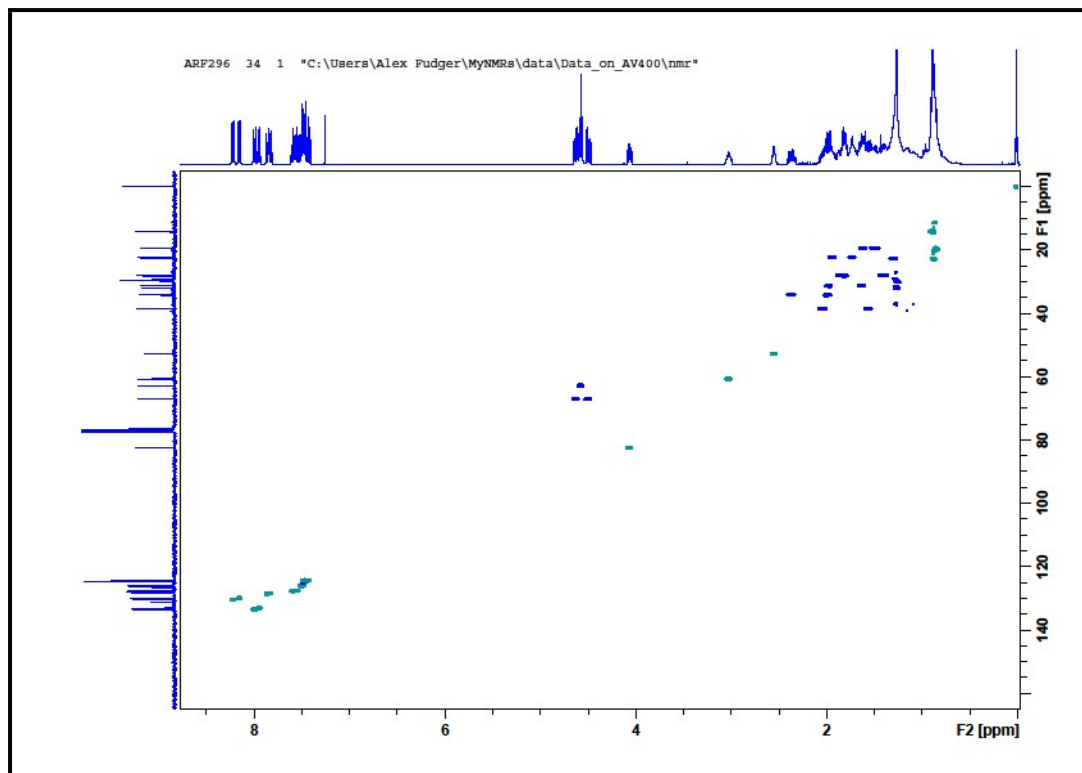

NOESY NMR spectrum for compound **17kb**

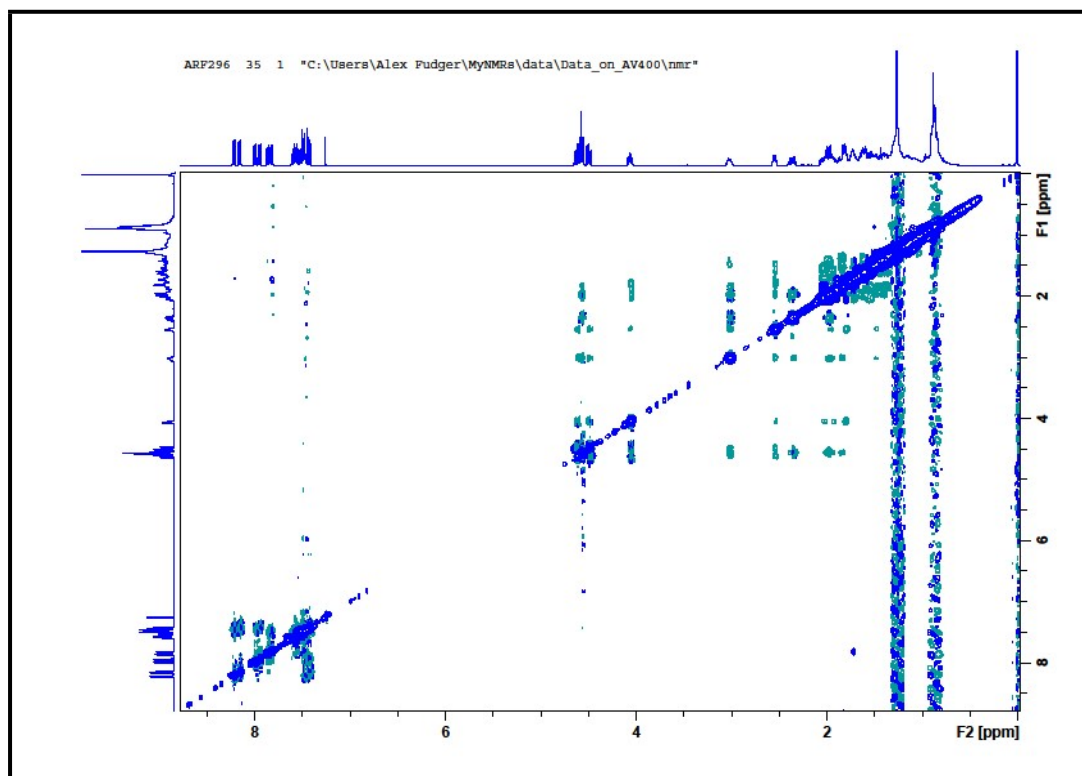

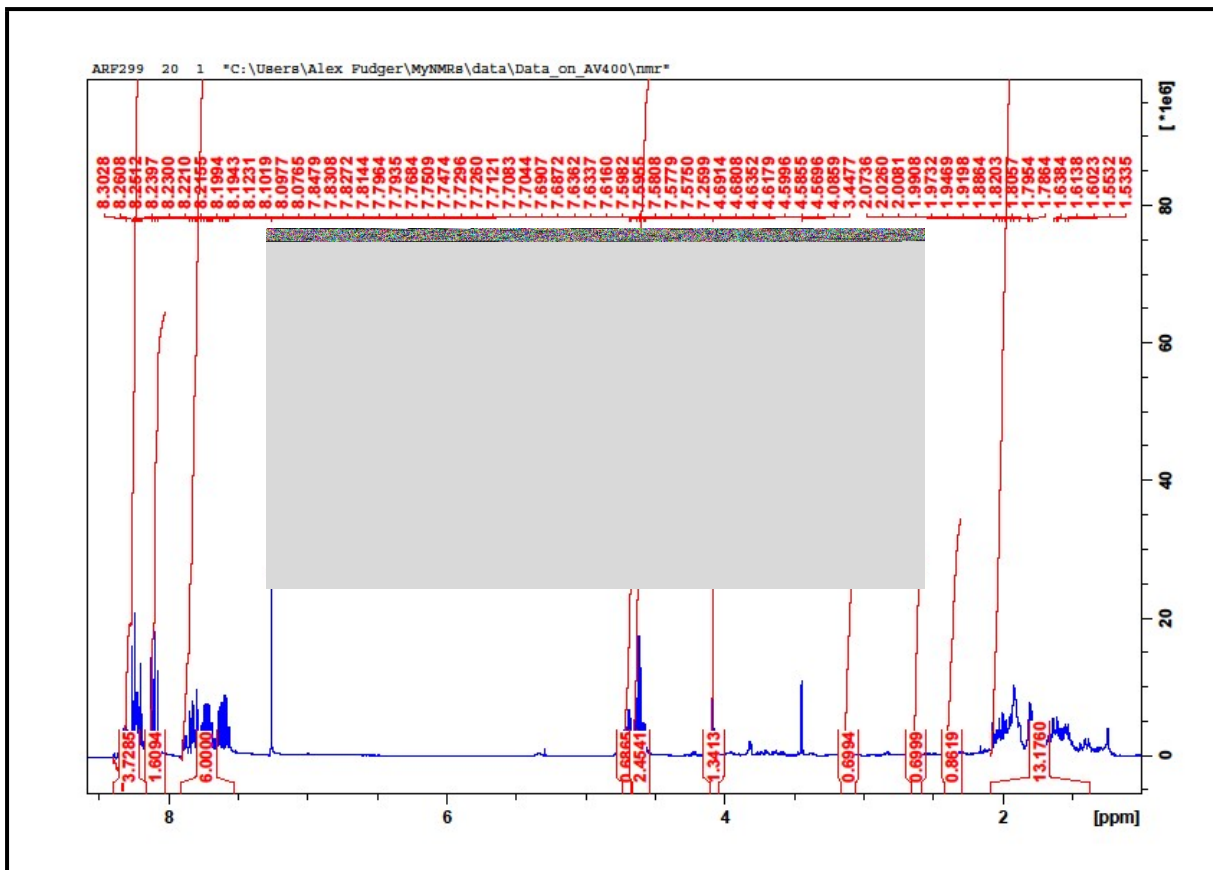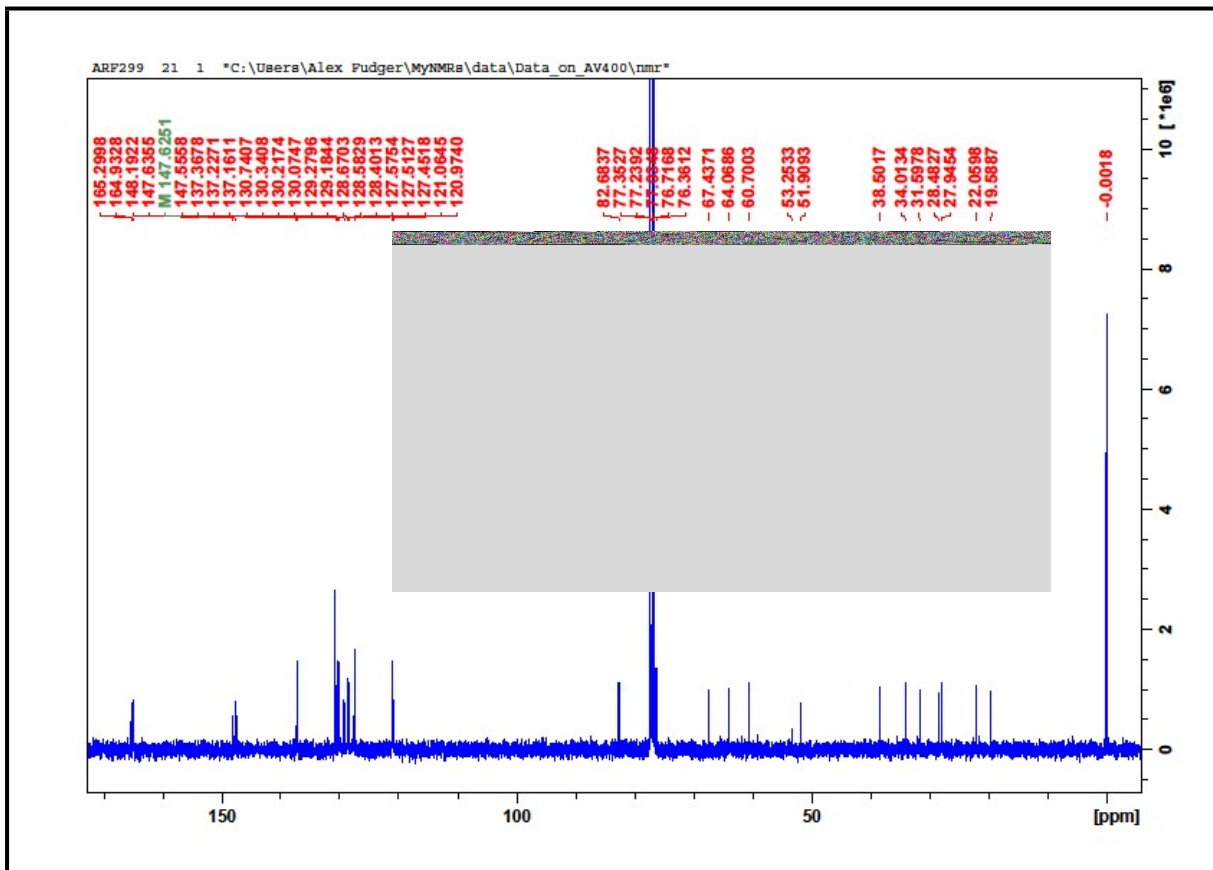



COSY NMR spectrum for compound **17la**

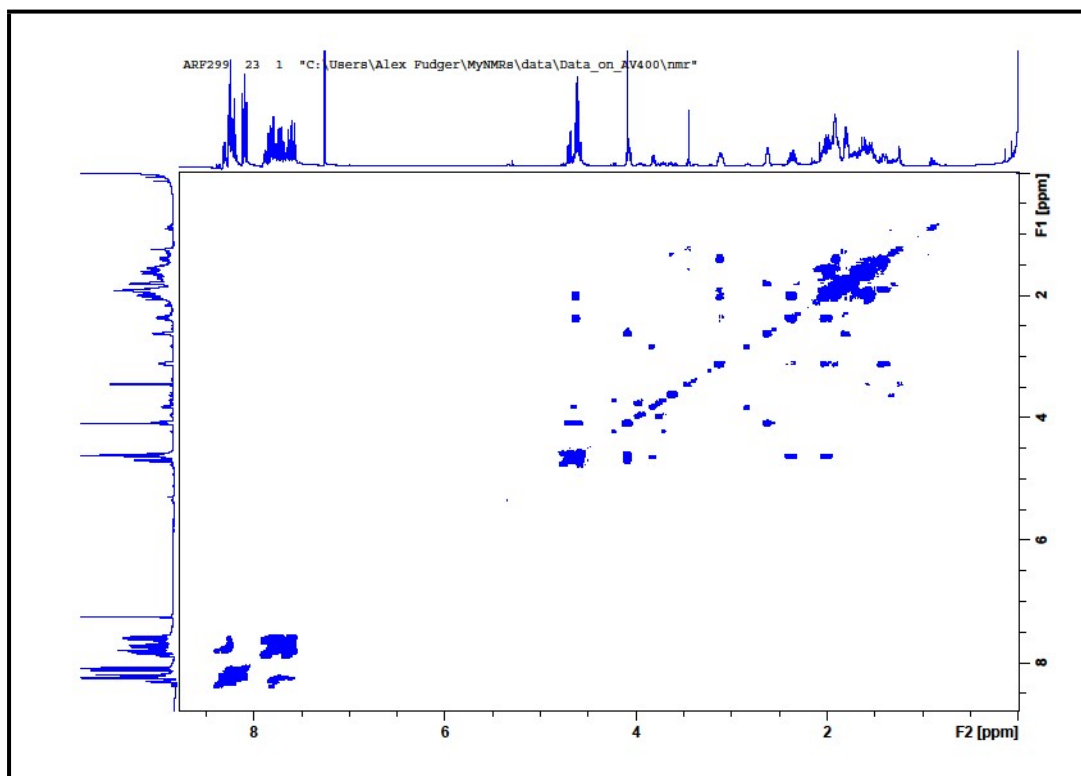

HSQC NMR spectrum for compound **17la**

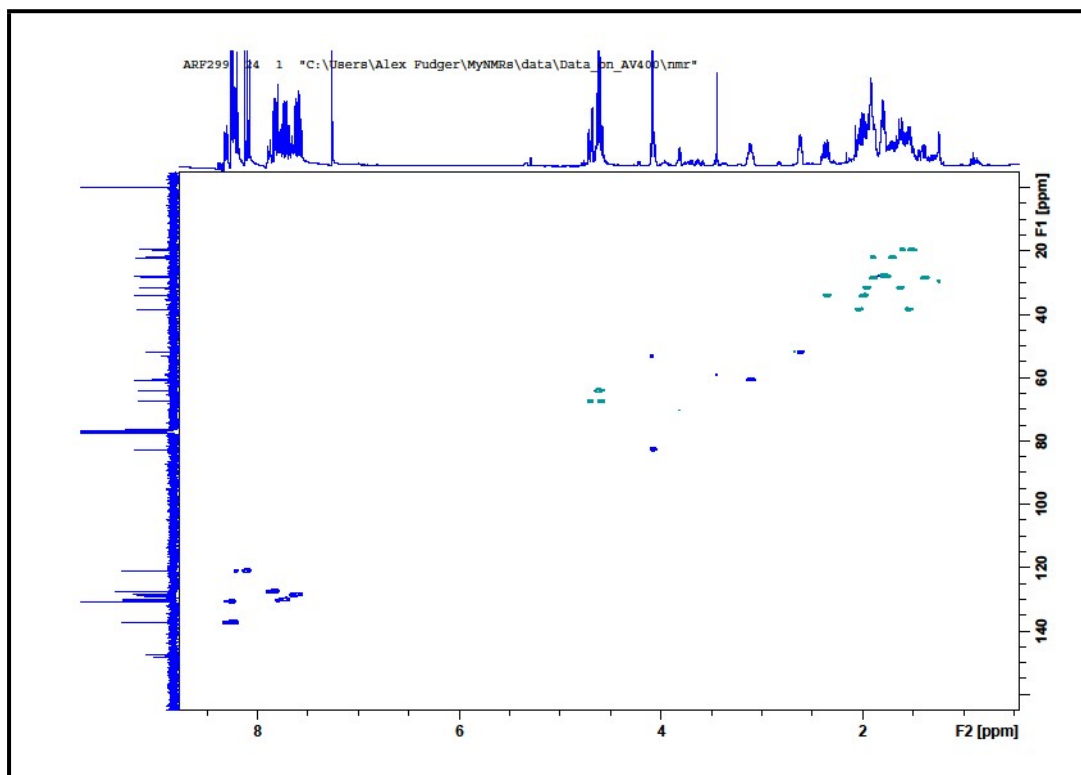



NOESY NMR spectrum for compound **17la**

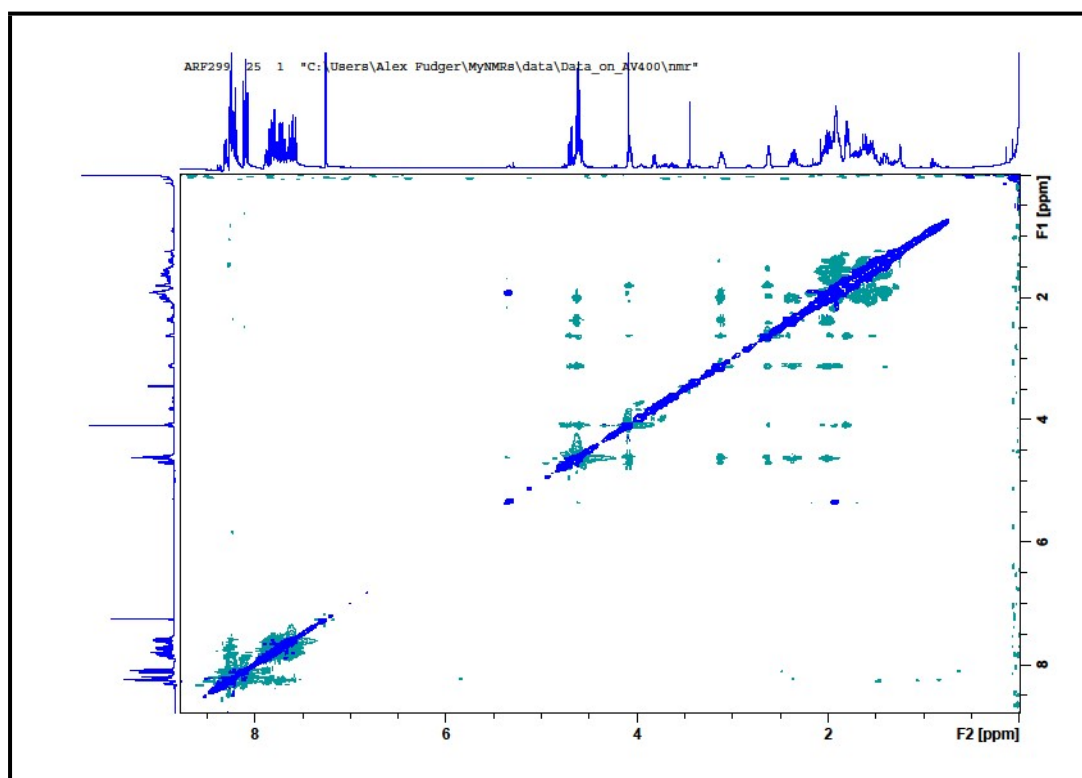

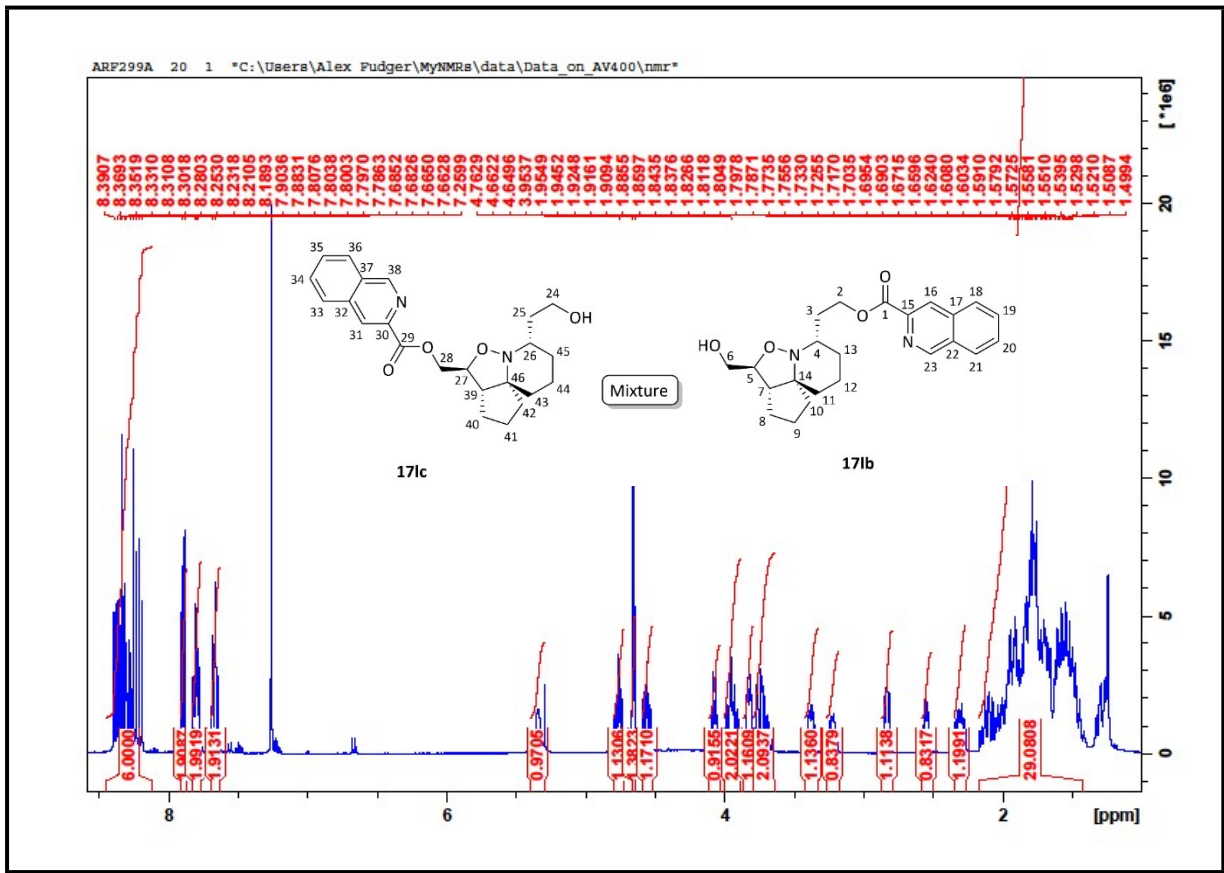

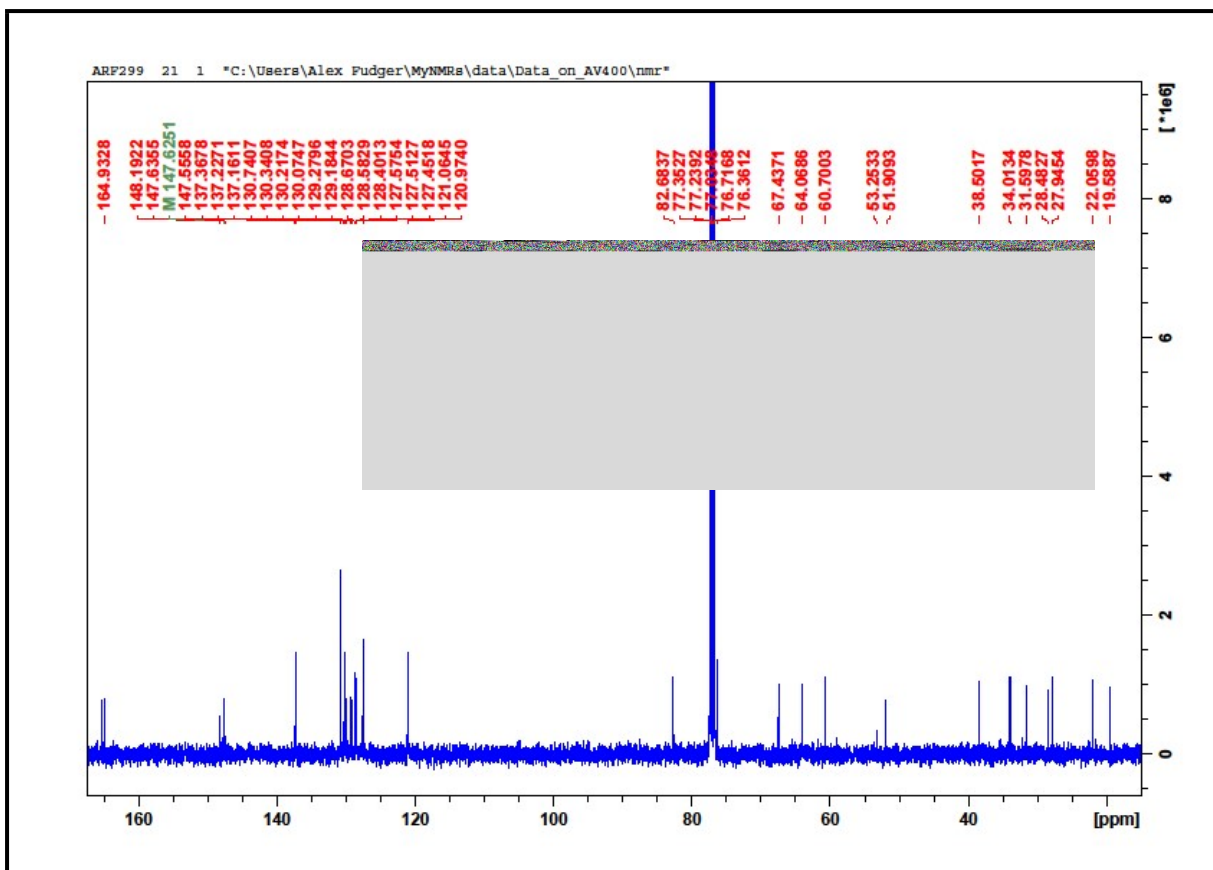

COSY NMR spectrum for mixture of compounds **17lc** and **17lb**

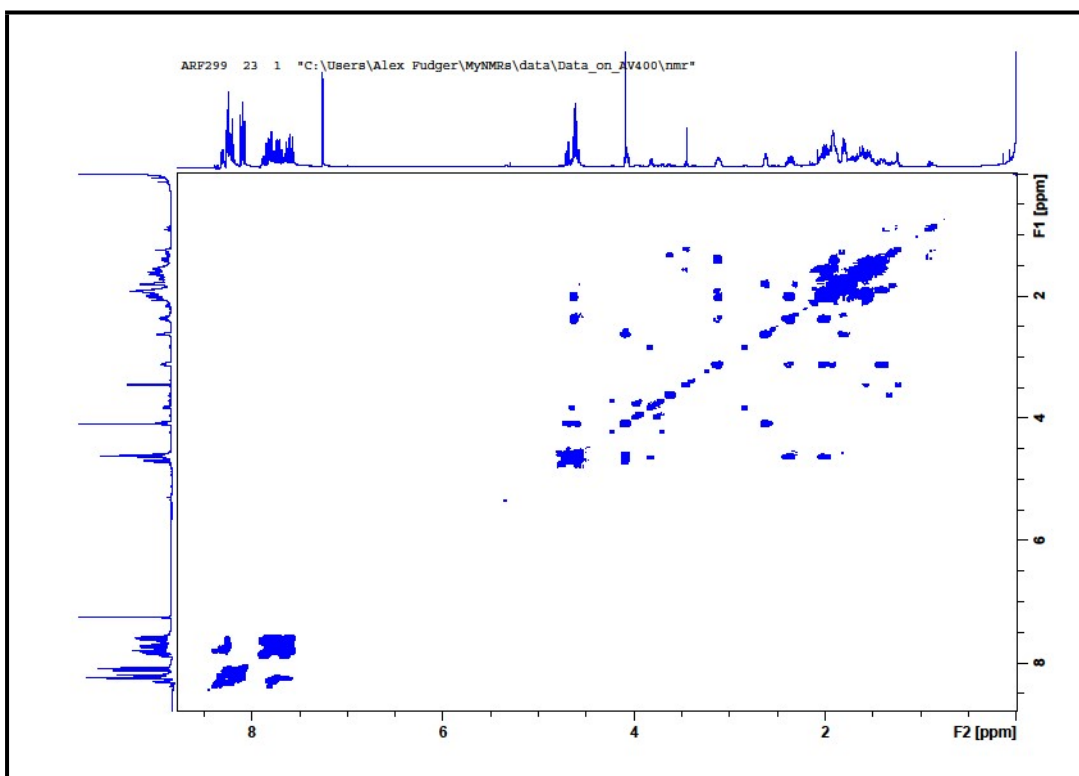

HSQC NMR spectrum for mixture of compounds **17lc** and **17lb**

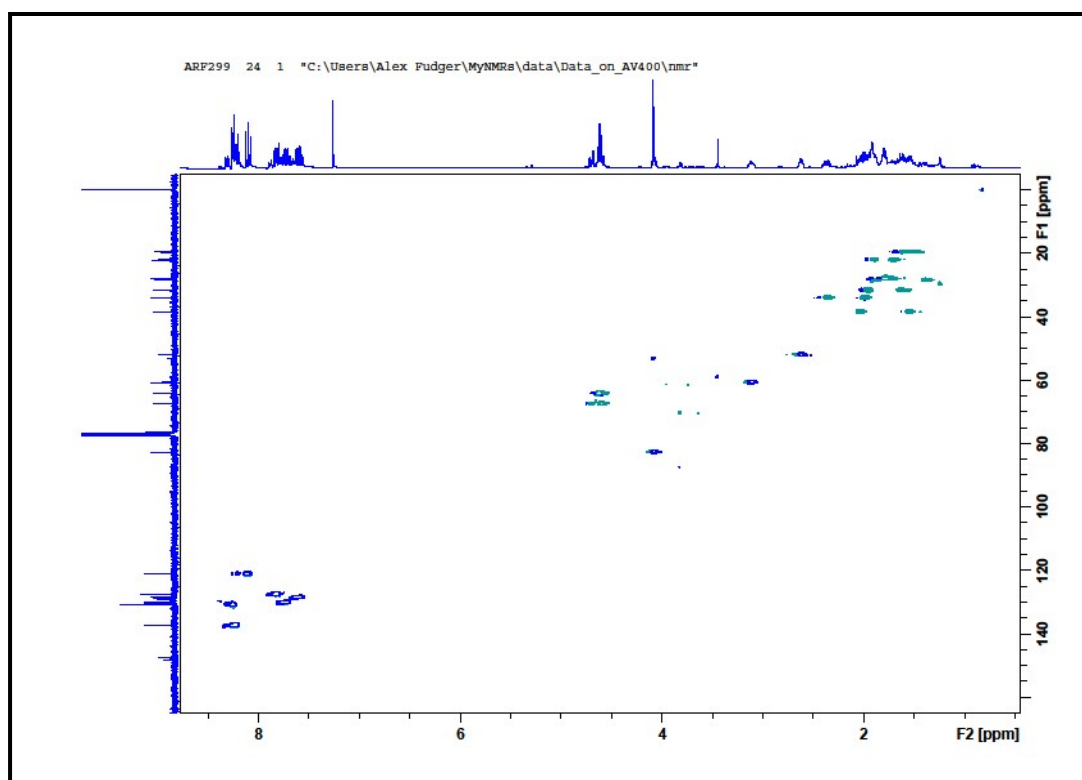

NOESY NMR spectrum for mixture of compounds **17lc** and **17lb**

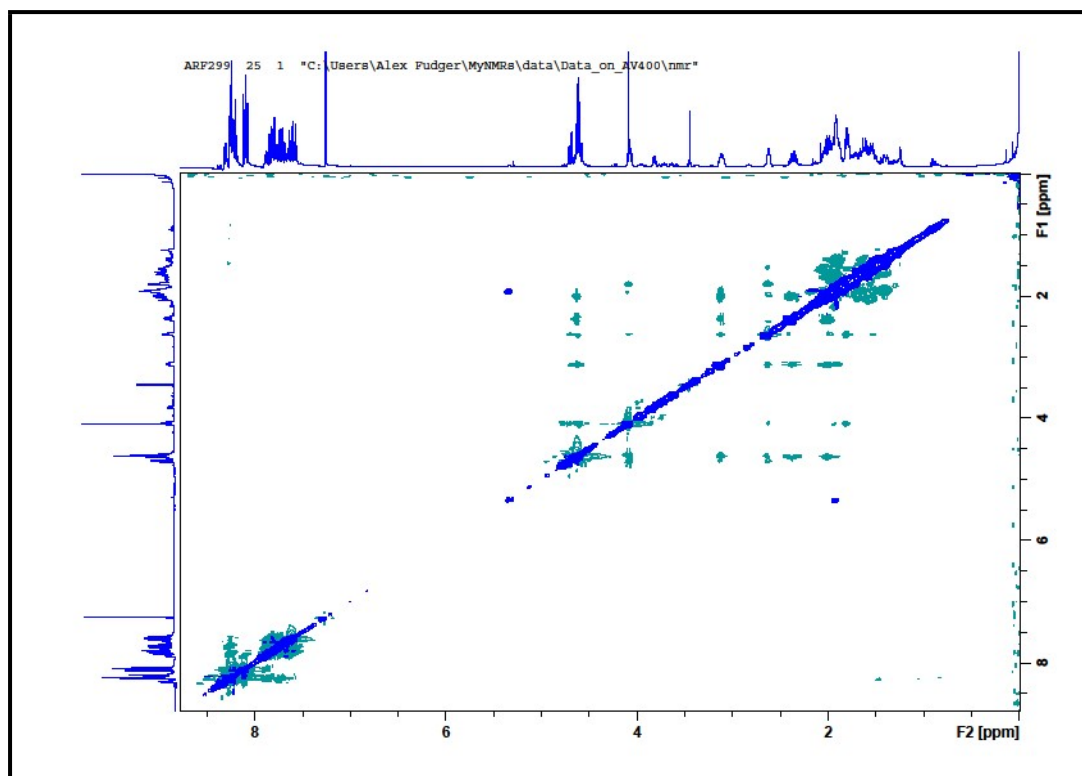

Supplement: d2ob01626e1.pdf [file d2ob01626e1.pdf]
